# Supplementary material for: Synthesis of fused 3-trifluoromethyl-1,2,4-triazoles via base-promoted [3 + 2] cycloaddition of nitrile imines and 1H-benzo[d]imidazole-2-thiols
Source: Royal Society of Chemistry journal article supplement (doi:10.1039/d3ob01133j), 2023-01-01
Supplement: d3ob01133j1.pdf [file d3ob01133j1.pdf]

Supporting Information

**Synthesis of Fused 3-Trifluoromethyl-1,2,4-Triazoles via  
Base-Promoted [3+2] Cycloaddition of Nitrile Imines and  
1*H*-Benzo[*d*]imidazole-2-thiols**

Kaili Cen,<sup>+a</sup> Jiahao Wei,<sup>+c</sup> Yuting Feng,<sup>+d</sup> Yuan Liu,<sup>d</sup> Xinye Wang,<sup>d</sup> Yangyu Liu,<sup>d</sup> Yalin Yin,<sup>a</sup>  
Junhong Yu,<sup>a</sup> Dahan Wang<sup>\*b</sup> and Jinhui Cai<sup>\*a</sup>

<sup>a</sup>College of Chemistry and Chemical Engineering, University of South China, Hengyang 421001,  
Hunan, China

<sup>b</sup>Department of Food and Chemical Engineering, Shaoyang University, Shaoyang 422100, Hunan,  
China

<sup>c</sup>School of Pharmaceutical Science, University of South China, Hengyang 421001, Hunan, China

<sup>d</sup>Chuanshan College University of South China, Hengyang 421001, Hunan, China

E-mail: jinhuicai@usc.edu.cn; syudhwang@163.com

<sup>+</sup>*These authors contributed equally to this work*

**Table of Contents**

|                                                                                                                                                                                                      |       |
|------------------------------------------------------------------------------------------------------------------------------------------------------------------------------------------------------|-------|
| 1. General Information.....                                                                                                                                                                          | SI-2  |
| 2. General Procedure for Synthesis of Fused 3-Trifluoromethyl-1,2,4-Triazoles via Base-Promoted<br>[3+2] Cycloaddition of Nitrile Imines and<br>1 <i>H</i> -Benzo[ <i>d</i> ]imidazole-2-thiols..... | SI-3  |
| 3. Spectra Data of <b>3a-3x</b> .....                                                                                                                                                                | SI-4  |
| 4. Gram-scale Reaction and Derivatizations of <b>3j</b> .....                                                                                                                                        | SI-11 |
| 5. X-ray Crystallography Data of <b>3f</b> .....                                                                                                                                                     | SI-16 |
| 6. References.....                                                                                                                                                                                   | SI-17 |
| 7. NMR Spectra .....                                                                                                                                                                                 | SI-18 |

## 1. General Information

Unless otherwise noted, all experiments were carried out under nitrogen atmosphere. Reactions were monitored by thin-layer chromatography (TLC). TLC was performed using Huanghai  $8\pm 0.2$   $\mu\text{m}$  precoated glass plates (0.25 mm) and visualized by UV fluorescence quenching and  $\text{KMnO}_4$ . Huanghai silica gel (particle size 200 – 300 mesh) was used for chromatography.  $^1\text{H}$  NMR spectra were recorded at room temperature on a Bruker ADVANCE III 500 MHz spectrometer and were reported relative to residual  $\text{CDCl}_3$  ( $\delta$  7.26 ppm).  $^{13}\text{C}$  NMR spectra were recorded on a Bruker ADVANCE III 500 MHz spectrometer (125 MHz) and were reported relative to  $\text{CDCl}_3$  ( $\delta$  77.16 ppm).  $^{19}\text{F}$  NMR spectra were recorded on a Bruker ADVANCE III 500 MHz spectrometer (471 MHz). Data for  $^1\text{H}$  NMR were reported as chemical shift ( $\delta$  ppm) (multiplicity, coupling constant (Hz), integration) using standard abbreviations for multiplicities: s = singlet, d = doublet, t = triplet, q = quartet, m = multiplet. Data for  $^{13}\text{C}$  NMR and  $^{19}\text{F}$  NMR were reported in terms of chemical shifts ( $\delta$  ppm). High resolution mass spectra (HRMS) were obtained by use of a Bruker Compact TOF mass spectrometer in electrospray ionization mode (ESI<sup>+</sup>).

Unless otherwise noted, all reagents were purchased commercially from Adamas, Innochem, Alfa, Energy Chemical, Sigma-Aldrich and used without further purification. Petroleum ether (PE) (60 ~ 90 °C), ethyl acetate (EA) and dichloromethane (DCM) were used as eluent for silica gel chromatography. Dry solvents were purchased commercially. Nitrile imines derivatives were synthesized smoothly according to literature.<sup>1-2</sup>

## 2. General Procedure for Synthesis of Fused 3-Trifluoromethyl-1,2,4-Triazoles via Base-Promoted [3+2] Cycloaddition of Nitrile Imines and 1*H*-Benzo[*d*]imidazole-2-thiols

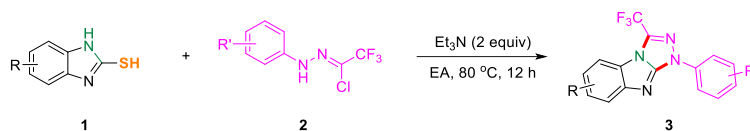

A mixture of 1*H*-benzo[*d*]imidazole-2-thiol **1** (15.3 mg, 0.1 mmol, 1 equiv.), nitrile imines **2** (0.15 mmol, 1.5 equiv.), Et<sub>3</sub>N (2 equiv.), and EA (1 mL) was added to a 10 mL Schlenk-tube, and the mixture was stirred at 80 °C for 12 hours. After the reaction was completed, the mixture was diluted with EA (20 mL) and filtered. The filtrates were concentrated under reduced pressure to give a crude residue which was purified by flash column chromatography to provide the desired product **3a** in 96% yield as a pale solid. *R<sub>f</sub>* = 0.4 (PE : EA = 20 : 1). <sup>1</sup>H NMR (500 MHz, CDCl<sub>3</sub>) δ 8.25 (d, *J* = 8.0 Hz, 2H), 7.82 (d, *J* = 8.2 Hz, 1H), 7.76 (d, *J* = 8.1 Hz, 1H), 7.55 (t, *J* = 7.8 Hz, 2H), 7.48 (t, *J* = 7.8 Hz, 1H), 7.35 – 7.28 (m, 2H). <sup>13</sup>C NMR (125 MHz, CDCl<sub>3</sub>) δ 151.7, 149.9, 137.0, 129.8 (q, *J* = 43.8 Hz), 129.7, 126.7, 126.2, 124.5, 121.5, 120.0, 117.94 (q, *J* = 267.5 Hz), 117.90, 112.1. <sup>19</sup>F NMR (471 MHz, CDCl<sub>3</sub>) δ -64.79. HRMS (ESI<sup>+</sup>) *m/z* calc'd for C<sub>15</sub>H<sub>10</sub>F<sub>3</sub>N<sub>4</sub><sup>+</sup> [M+H]<sup>+</sup> : 303.0852, found 303.0855

### 3. Spectra Data of 3a-3x

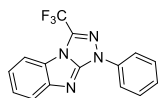

#### 1-Phenyl-3-(trifluoromethyl)-1H-benzo[4,5]imidazo[2,1-c][1,2,4]triazole (3a)

Following the general procedure, the desired product **3a** (29.0 mg) was obtained in 96% yield as a pale solid.  $R_f = 0.4$  (PE : EA = 20 : 1).

$^1\text{H}$  NMR (500 MHz,  $\text{CDCl}_3$ )  $\delta$  8.25 (d,  $J = 8.0$  Hz, 2H), 7.82 (d,  $J = 8.2$  Hz, 1H), 7.76 (d,  $J = 8.1$  Hz, 1H), 7.55 (t,  $J = 7.8$  Hz, 2H), 7.48 (t,  $J = 7.8$  Hz, 1H), 7.35 – 7.28 (m, 2H).  $^{13}\text{C}$  NMR (125 MHz,  $\text{CDCl}_3$ )  $\delta$  151.7, 149.9, 137.0, 129.75 (q,  $J = 43.8$  Hz), 129.71, 126.7, 126.2, 124.5, 121.5, 120.0, 117.94 (q,  $J = 267.5$  Hz), 117.90, 112.1.  $^{19}\text{F}$  NMR (471 MHz,  $\text{CDCl}_3$ )  $\delta$  -64.79. HRMS (ESI<sup>+</sup>)  $m/z$  calc'd for  $\text{C}_{15}\text{H}_{10}\text{F}_3\text{N}_4^+$  [M+H]<sup>+</sup> : 303.0852, found 303.0855.

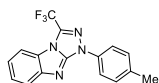

#### 1-(p-Tolyl)-3-(trifluoromethyl)-1H-benzo[4,5]imidazo[2,1-c][1,2,4]triazole (3b)

Following the general procedure, the desired product **3b** (29.1 mg) was obtained in 92% yield as a pale solid.  $R_f = 0.4$  (PE : EA = 20 : 1).

$^1\text{H}$  NMR (500 MHz,  $\text{CDCl}_3$ )  $\delta$  8.09 (d,  $J = 8.4$  Hz, 2H), 7.82 (d,  $J = 8.2$  Hz, 1H), 7.76 (d,  $J = 8.2$  Hz, 1H), 7.47 (t,  $J = 7.8$  Hz, 1H), 7.36 – 7.27 (m, 3H), 2.39 (s, 3H).  $^{13}\text{C}$  NMR (125 MHz,  $\text{CDCl}_3$ )  $\delta$  151.7, 150.0, 136.6, 134.7, 130.2, 129.5 (q,  $J = 43.8$  Hz), 126.1, 124.6, 121.3, 120.0, 118.0 (q,  $J = 268.8$  Hz), 117.8, 112.1, 21.2.  $^{19}\text{F}$  NMR (471 MHz,  $\text{CDCl}_3$ )  $\delta$  -64.74. HRMS (ESI<sup>+</sup>): calc'd for  $\text{C}_{16}\text{H}_{12}\text{F}_3\text{N}_4^+$  [M+H]<sup>+</sup>: 317.1009, found 317.1009.

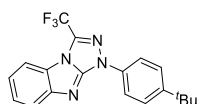

#### 1-(4-(tert-Butyl)phenyl)-3-(trifluoromethyl)-1H-benzo[4,5]imidazo[2,1-c][1,2,4]triazole (3c)

Following the general procedure, the desired product **3c** (32.2 mg) was obtained in 90% yield as a pale solid.  $R_f = 0.4$  (PE : EA = 20 : 1).

$^1\text{H}$  NMR (500 MHz,  $\text{CDCl}_3$ )  $\delta$  8.14 (d,  $J = 8.6$  Hz, 2H), 7.83 (d,  $J = 8.2$  Hz, 1H), 7.78 (d,  $J = 8.2$  Hz, 1H), 7.57 (d,  $J = 8.6$  Hz, 2H), 7.49 (t,  $J = 7.8$  Hz, 1H), 7.31 (t,  $J = 7.8$

Hz, 1H), 1.37 (s, 9H).  $^{13}\text{C}$  NMR (125 MHz,  $\text{CDCl}_3$ )  $\delta$  151.9, 150.0, 134.6, 129.6 (q,  $J = 43.8$  Hz), 126.6, 126.2, 124.7, 121.3, 120.0, 119.1, 118.0 (q,  $J = 268.8$  Hz), 116.9, 112.1, 34.8, 31.5.  $^{19}\text{F}$  NMR (471 MHz,  $\text{CDCl}_3$ )  $\delta$  -64.73. HRMS (ESI $^+$ ): calc'd for  $\text{C}_{19}\text{H}_{18}\text{F}_3\text{N}_4^+$  [M+H] $^+$ : 359.1478, found 359.1476.

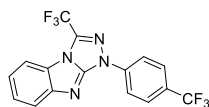

**3-(Trifluoromethyl)-1-(4-(trifluoromethyl)phenyl)-1H-benzo[4,5]imidazo[2,1-c][1,2,4]triazole (3d)**

Following the general procedure, the desired product **3d** (26.6 mg) was obtained in 72% yield as a colorless oil.  $R_f = 0.4$  (PE : EA = 20 : 1).

$^1\text{H}$  NMR (500 MHz,  $\text{CDCl}_3$ )  $\delta$  8.40 (d,  $J = 8.6$  Hz, 2H), 7.81 (t,  $J = 8.0$  Hz, 3H), 7.76 (d,  $J = 8.0$  Hz, 1H), 7.50 (t,  $J = 7.6$  Hz, 1H), 7.34 (t,  $J = 7.6$  Hz, 1H).  $^{13}\text{C}$  NMR (126 MHz,  $\text{CDCl}_3$ )  $\delta$  151.5, 149.8, 139.6, 130.6 (q,  $J = 43.8$  Hz), 128.5 (q,  $J = 32.5$  Hz), 127.0 (q,  $J = 3.8$  Hz), 126.5, 124.6, 123.9 (q,  $J = 271.9$  Hz), 122.0, 120.2, 117.79 (q,  $J = 268.8$  Hz), 117.77, 112.2.  $^{19}\text{F}$  NMR (471 MHz,  $\text{CDCl}_3$ )  $\delta$  -62.29, -64.94. HRMS (ESI $^+$ )  $m/z$  calc'd for  $\text{C}_{16}\text{H}_9\text{F}_6\text{N}_4^+$  [M+H] $^+$  : 371.0726, found 371.0725.

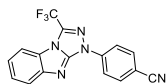

**4-(3-(Trifluoromethyl)-1H-benzo[4,5]imidazo[2,1-c][1,2,4]triazol-1-yl)benzotrile (3e)**

Following the general procedure, the desired product **3e** (20.9 mg) was obtained in 64% yield as a pale solid.  $R_f = 0.3$  (PE : EA = 10 : 1).

$^1\text{H}$  NMR (500 MHz,  $\text{CDCl}_3$ )  $\delta$  8.42 (d,  $J = 8.6$  Hz, 2H), 7.87 – 7.80 (m, 3H), 7.76 (d,  $J = 8.2$  Hz, 1H), 7.51 (t,  $J = 7.8$  Hz, 1H), 7.35 (t,  $J = 7.8$  Hz, 1H).  $^{13}\text{C}$  NMR (125 MHz,  $\text{CDCl}_3$ )  $\delta$  151.3, 149.7, 140.1, 133.9, 131.1 (q,  $J = 45.0$  Hz), 126.6, 124.6, 122.3, 120.3, 118.4, 118.0, 117.7 (q,  $J = 268.8$  Hz), 112.2, 109.9.  $^{19}\text{F}$  NMR (471 MHz,  $\text{CDCl}_3$ )  $\delta$  -64.98. HRMS (ESI $^+$ ): calc'd for  $\text{C}_{16}\text{H}_9\text{F}_3\text{N}_5^+$  [M+H] $^+$ : 328.0805, found, 328.0802.

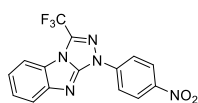

**1-(4-Nitrophenyl)-3-(trifluoromethyl)-1H-benzo[4,5]imidazo[2,1-c][1,2,4]triazole (3f)**

Following the general procedure, the desired product **3f** (22.9 mg) was obtained in 66% yield as a pale solid.  $R_f = 0.2$  (PE : EA = 10 : 1).

$^1\text{H}$  NMR (500 MHz,  $\text{CDCl}_3$ )  $\delta$  8.49 – 8.43 (m, 2H), 8.42 – 8.37 (m, 2H), 7.82 (d,  $J = 8.2$  Hz, 1H), 7.76 (d,  $J = 8.0$  Hz, 1H), 7.51 (t,  $J = 7.8$  Hz, 1H), 7.36 (t,  $J = 7.8$  Hz, 1H).

$^{13}\text{C}$  NMR (125 MHz,  $\text{CDCl}_3$ )  $\delta$  151.2, 149.6, 145.4, 141.5, 131.3 (q,  $J = 43.8$  Hz), 126.6, 125.6, 124.7, 122.4, 120.4, 117.8, 117.6 (q,  $J = 270.0$  Hz), 112.2.  $^{19}\text{F}$  NMR

(471 MHz,  $\text{CDCl}_3$ )  $\delta$  -65.17. HRMS (ESI<sup>+</sup>): calc'd for  $\text{C}_{15}\text{H}_9\text{F}_3\text{N}_5\text{O}_2^+$  [M+H]<sup>+</sup>: 348.0703, found 348.0698.

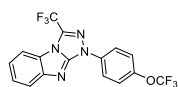

**1-(4-(Trifluoromethoxy)phenyl)-3-(trifluoromethyl)-1H-benzo[4,5]imidazo[2,1-c][1,2,4]triazole (3g)**

Following the general procedure, the desired product **3g** (29.7 mg) was obtained in 77% yield as a colorless oil.  $R_f = 0.3$  (PE : EA = 15 : 1).

$^1\text{H}$  NMR (500 MHz,  $\text{CDCl}_3$ )  $\delta$  8.34 – 8.28 (m, 2H), 7.81 (d,  $J = 8.2$  Hz, 1H), 7.77 (d,  $J = 8.2$  Hz, 1H), 7.52 – 7.47 (m, 1H), 7.41 (d,  $J = 8.6$  Hz, 2H), 7.33 (t,  $J = 7.8$  Hz, 1H).

$^{13}\text{C}$  NMR (125 MHz,  $\text{CDCl}_3$ )  $\delta$  151.5, 149.9, 147.2, 135.5, 130.2 (q,  $J = 45.0$  Hz), 126.4, 124.7, 122.5, 121.8, 120.6 (q,  $J = 256.3$  Hz), 120.1, 119.2, 117.8 (q,  $J = 268.8$

Hz), 112.2.  $^{19}\text{F}$  NMR (471 MHz,  $\text{CDCl}_3$ )  $\delta$  -58.05, -64.86. HRMS (ESI<sup>+</sup>): calc'd for  $\text{C}_{16}\text{H}_9\text{F}_6\text{N}_4\text{O}^+$  [M+H]<sup>+</sup>: 387.0675, found 387.0672.

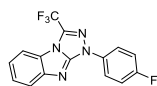

**1-(4-Fluorophenyl)-3-(trifluoromethyl)-1H-benzo[4,5]imidazo[2,1-c][1,2,4]triazole (3h)**

Following the general procedure, the desired product **3h** (26.9 mg) was obtained in 84% yield as a colorless oil.  $R_f = 0.4$  (PE : EA = 20 : 1).

$^1\text{H}$  NMR (500 MHz,  $\text{CDCl}_3$ )  $\delta$  8.30 – 8.18 (m, 2H), 7.86 – 7.72 (m, 2H), 7.55 – 7.45 (m, 1H), 7.36 – 7.20 (m, 3H).  $^{13}\text{C}$  NMR (125 MHz,  $\text{CDCl}_3$ )  $\delta$  161.0 (d,  $J = 245.0$  Hz),

151.6, 149.9, 133.2, 129.8 (q,  $J = 45.0$  Hz), 126.3, 124.7, 121.6, 120.0, 119.7 (d,  $J = 7.5$  Hz), 117.9 (q,  $J = 268.8$  Hz), 116.6 (d,  $J = 23.8$  Hz), 112.2.  $^{19}\text{F}$  NMR (471 MHz,

$\text{CDCl}_3$ )  $\delta$  -64.79, -114.92. HRMS (ESI<sup>+</sup>): calc'd for  $\text{C}_{15}\text{H}_9\text{F}_4\text{N}_4^+$  [M+H]<sup>+</sup>: 321.0758, found 321.0755.

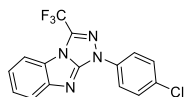

**1-(4-Chlorophenyl)-3-(trifluoromethyl)-1H-benzo[4,5]imidazo[2,1-c][1,2,4]triazole (3i)**

Following the general procedure, the desired product **3i** (27.9 mg) was obtained in 83% yield as a colorless oil.  $R_f = 0.4$  (PE : EA = 20 : 1).

$^1\text{H}$  NMR (500 MHz,  $\text{CDCl}_3$ )  $\delta$  8.22 (d,  $J = 8.7$  Hz, 2H), 7.81 (d,  $J = 8.2$  Hz, 1H), 7.76 (d,  $J = 8.2$  Hz, 1H), 7.54 – 7.45 (m, 3H), 7.32 (t,  $J = 7.8$  Hz, 1H).  $^{13}\text{C}$  NMR (125 MHz,  $\text{CDCl}_3$ )  $\delta$  151.5, 149.9, 135.6, 132.1, 129.8, 129.4 (q,  $J = 45.0$  Hz), 126.4, 124.7, 121.7, 120.1, 119.1, 117.9 (q,  $J = 268.8$  Hz), 112.2.  $^{19}\text{F}$  NMR (471 MHz,  $\text{CDCl}_3$ )  $\delta$  -64.83. HRMS (ESI<sup>+</sup>): calc'd for  $\text{C}_{15}\text{H}_9\text{ClF}_3\text{N}_4^+$  [M+H]<sup>+</sup>: 337.0462, found 337.0462.

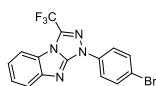

**1-(4-Bromophenyl)-3-(trifluoromethyl)-1H-benzo[4,5]imidazo[2,1-c][1,2,4]triazole (3j)**

Following the general procedure, the desired product **3j** (25.8 mg) was obtained in 68% yield as a pale solid.  $R_f = 0.4$  (PE : EA = 20 : 1).

$^1\text{H}$  NMR (500 MHz,  $\text{CDCl}_3$ )  $\delta$  8.19 – 8.15 (m, 2H), 7.82 (d,  $J = 8.2$  Hz, 1H), 7.77 (d,  $J = 8.2$  Hz, 1H), 7.69 – 7.64 (m, 2H), 7.52 – 7.47 (m, 1H), 7.36 – 7.30 (m, 1H).  $^{13}\text{C}$  NMR (125 MHz,  $\text{CDCl}_3$ )  $\delta$  151.6, 149.9, 136.1, 132.7, 129.2 (q,  $J = 267.5$  Hz), 126.5, 124.7, 121.8, 120.2, 119.9, 119.4, 117.9 (q,  $J = 267.5$  Hz), 112.2.  $^{19}\text{F}$  NMR (471 MHz,  $\text{CDCl}_3$ )  $\delta$  -64.86. HRMS (ESI<sup>+</sup>): calc'd for  $\text{C}_{15}\text{H}_9\text{BrF}_3\text{N}_4^+$  [M+H]<sup>+</sup>: 380.9957, found 380.9957.

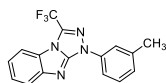

**1-(*m*-Tolyl)-3-(trifluoromethyl)-1H-benzo[4,5]imidazo[2,1-c][1,2,4]triazole (3k)**

Following the general procedure, the desired product **3k** (28.8 mg) was obtained in 91% yield as a pale solid.  $R_f = 0.4$  (PE : EA = 20 : 1).

$^1\text{H}$  NMR (500 MHz,  $\text{CDCl}_3$ )  $\delta$  8.08 – 8.03 (m, 2H), 7.82 (d,  $J = 8.2$  Hz, 1H), 7.76 (d,  $J = 8.2$  Hz, 1H), 7.49 (t,  $J = 7.4$  Hz, 1H), 7.42 (t,  $J = 7.8$  Hz, 1H), 7.30 (t,  $J = 8.2$  Hz, 1H), 7.13 (d,  $J = 7.5$  Hz, 1H), 2.48 (s, 3H).  $^{13}\text{C}$  NMR (125 MHz,  $\text{CDCl}_3$ )  $\delta$  151.7, 149.9, 139.9, 137.0, 129.6 (q,  $J = 43.8$  Hz), 129.5, 127.5, 126.1, 124.6, 121.4, 120.0, 118.4, 118.0 (q,  $J = 268.8$  Hz), 115.1, 112.1, 21.8.  $^{19}\text{F}$  NMR (471 MHz,  $\text{CDCl}_3$ )  $\delta$

-64.75. HRMS (ESI<sup>+</sup>): calc'd for C<sub>16</sub>H<sub>12</sub>F<sub>3</sub>N<sub>4</sub><sup>+</sup> [M+H]<sup>+</sup>: 317.1009, found 317.1010.

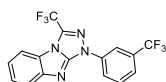

**3-(Trifluoromethyl)-1-(3-(trifluoromethyl)phenyl)-1H-benzo[4,5]imidazo[2,1-c][1,2,4]triazole (3l)**

Following the general procedure, the desired product **3l** (27.0 mg) was obtained in 73% yield as a colorless oil.  $R_f = 0.4$  (PE : EA = 20 : 1).

<sup>1</sup>H NMR (500 MHz, CDCl<sub>3</sub>) δ 8.56 (d,  $J = 8.2$  Hz, 1H), 8.48 (s, 1H), 7.83 (d,  $J = 8.2$  Hz, 1H), 7.76 (d,  $J = 8.1$  Hz, 1H), 7.69 (t,  $J = 7.8$  Hz, 1H), 7.59 (d,  $J = 7.6$  Hz, 1H), 7.50 (t,  $J = 7.6$  Hz, 1H), 7.33 (t,  $J = 7.6$  Hz, 1H). <sup>13</sup>C NMR (125 MHz, CDCl<sub>3</sub>) δ 151.5, 149.8, 137.5, 132.4 (q,  $J = 32.5$  Hz), 130.46 (q,  $J = 45.0$  Hz), 130.45, 126.4, 124.7, 123.7 (q,  $J = 271.3$  Hz), 123.1 (q,  $J = 3.8$  Hz), 121.9, 120.8, 120.3, 117.8 (q,  $J = 268.8$  Hz), 114.8 (q,  $J = 3.8$  Hz), 112.2. <sup>19</sup>F NMR (471 MHz, CDCl<sub>3</sub>) δ -62.70, -64.88.

HRMS (ESI<sup>+</sup>): calc'd for C<sub>16</sub>H<sub>9</sub>F<sub>6</sub>N<sub>4</sub><sup>+</sup> [M+H]<sup>+</sup>: 371.0726, found 371.0726.

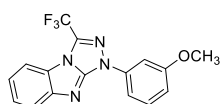

**1-(3-Methoxyphenyl)-3-(trifluoromethyl)-1H-benzo[4,5]imidazo[2,1-c][1,2,4]triazole (3m)**

Following the general procedure, the desired product **3m** (25.6 mg) was obtained in 77% yield as a colorless oil.  $R_f = 0.4$  (PE : EA = 20 : 1).

<sup>1</sup>H NMR (500 MHz, CDCl<sub>3</sub>) δ 7.89 (d,  $J = 7.8$  Hz, 1H), 7.81 (d,  $J = 8.2$  Hz, 1H), 7.78 – 7.73 (m, 2H), 7.51 – 7.41 (m, 2H), 7.30 (t,  $J = 7.6$  Hz, 1H), 6.86 (d,  $J = 8.0$  Hz, 1H), 3.92 (s, 3H). <sup>13</sup>C NMR (125 MHz, CDCl<sub>3</sub>) δ 160.7, 151.7, 149.9, 138.1, 130.6, 129.7 (q,  $J = 43.8$  Hz), 126.2, 124.6, 121.5, 120.1, 117.9 (q,  $J = 268.8$  Hz), 112.7, 112.1, 110.1, 103.6, 55.7. <sup>19</sup>F NMR (471 MHz, CDCl<sub>3</sub>) δ -64.77. HRMS (ESI<sup>+</sup>): calc'd for C<sub>16</sub>H<sub>12</sub>F<sub>3</sub>N<sub>4</sub>O<sup>+</sup> [M+H]<sup>+</sup>: 333.0958, found 333.0959.

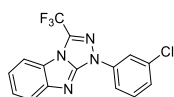

**1-(3-Chlorophenyl)-3-(trifluoromethyl)-1H-benzo[4,5]imidazo[2,1-c][1,2,4]triazole (3n)**

Following the general procedure, the desired product **3n** (23.5 mg) was obtained in 70% yield as a colorless oil.  $R_f = 0.3$  (PE : EA = 20 : 1).



$^1\text{H}$  NMR (500 MHz,  $\text{CDCl}_3$ )  $\delta$  8.27 – 8.24 (m, 1H), 8.22 (d,  $J = 8.2$  Hz, 1H), 7.81 (d,  $J = 8.2$  Hz, 1H), 7.75 (d,  $J = 8.2$  Hz, 1H), 7.52 – 7.45 (m, 2H), 7.34 – 7.28 (m, 2H).  $^{13}\text{C}$  NMR (125 MHz,  $\text{CDCl}_3$ )  $\delta$  151.5, 149.8, 137.9, 135.7, 130.8, 130.2 (q,  $J = 43.8$  Hz), 126.7, 126.3, 124.6, 121.8, 120.2, 118.0, 117.84 (q,  $J = 268.8$  Hz), 115.9, 112.1.  $^{19}\text{F}$  NMR (471 MHz,  $\text{CDCl}_3$ )  $\delta$  -64.95. HRMS (ESI $^+$ ): calc'd for  $\text{C}_{15}\text{H}_9\text{ClF}_3\text{N}_4^+$  [M+H] $^+$ : 337.0462, found 337.0462.

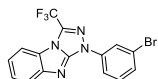

**1-(3-Bromophenyl)-3-(trifluoromethyl)-1H-benzo[4,5]imidazo[2,1-c][1,2,4]triazole (3o)**

Following the general procedure, the desired product **3o** (24.7 mg) was obtained in 65% yield as a pale solid.  $R_f = 0.4$  (PE : EA = 20 : 1).

$^1\text{H}$  NMR (500 MHz,  $\text{CDCl}_3$ )  $\delta$  8.42 (s, 1H), 8.30 (d,  $J = 8.0$  Hz, 1H), 7.84 (d,  $J = 8.2$  Hz, 1H), 7.78 (d,  $J = 8.2$  Hz, 1H), 7.54 – 7.41 (m, 3H), 7.34 (t,  $J = 7.8$  Hz, 1H).  $^{13}\text{C}$  NMR (125 MHz,  $\text{CDCl}_3$ )  $\delta$  151.5, 149.9, 138.0, 131.1, 130.3 (q,  $J = 45.0$  Hz), 129.7, 126.4, 124.7, 123.5, 121.8, 120.9, 120.2, 117.8 (q,  $J = 268.8$  Hz), 116.4, 112.2.  $^{19}\text{F}$  NMR (471 MHz,  $\text{CDCl}_3$ )  $\delta$  -64.86. HRMS (ESI $^+$ ): calc'd for  $\text{C}_{15}\text{H}_9\text{BrF}_3\text{N}_4^+$  [M+H] $^+$ : 380.9957, found 380.9956.

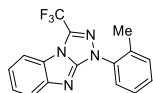

**1-(o-Tolyl)-3-(trifluoromethyl)-1H-benzo[4,5]imidazo[2,1-c][1,2,4]triazole (3p)**

Following the general procedure, the desired product **3p** (16.1 mg) was obtained in 51% yield as a pale solid.  $R_f = 0.4$  (PE : EA = 20 : 1).

$^1\text{H}$  NMR (500 MHz,  $\text{CDCl}_3$ )  $\delta$  7.80 (d,  $J = 8.2$  Hz, 1H), 7.76 (d,  $J = 8.2$  Hz, 1H), 7.62 (d,  $J = 7.5$  Hz, 1H), 7.48 (t,  $J = 7.8$  Hz, 1H), 7.44 – 7.36 (m, 3H), 7.31 (t,  $J = 7.8$  Hz, 1H), 2.42 (s, 3H).  $^{13}\text{C}$  NMR (125 MHz,  $\text{CDCl}_3$ )  $\delta$  153.4, 150.1, 134.8, 134.5, 132.1, 130.0 (q,  $J = 43.8$  Hz), 129.8, 127.3, 126.14, 126.11, 125.3, 121.1, 119.9, 118.0 (q,  $J = 268.8$  Hz), 112.2, 18.6.  $^{19}\text{F}$  NMR (471 MHz,  $\text{CDCl}_3$ )  $\delta$  -64.81. HRMS (ESI $^+$ ): calc'd for  $\text{C}_{16}\text{H}_{12}\text{F}_3\text{N}_4^+$  [M+H] $^+$ : 317.1009, found 317.1009.

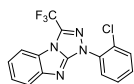

**1-(2-Chlorophenyl)-3-(trifluoromethyl)-1H-benzo[4,5]imidazo[2,1-c][1,2,4]triazol**

### e (3q)

Following the general procedure, the desired product **3q** (17.5 mg) was obtained in 52% yield as a colorless oil.  $R_f = 0.4$  (PE : EA = 20 : 1).

$^1\text{H}$  NMR (500 MHz,  $\text{CDCl}_3$ )  $\delta$  7.80 (d,  $J = 8.2$  Hz, 1H), 7.76 (d,  $J = 8.2$  Hz, 1H), 7.72 – 7.68 (m, 1H), 7.65 – 7.61 (m, 1H), 7.52 – 7.44 (m, 3H), 7.32 (t,  $J = 7.8$  Hz, 1H).  $^{13}\text{C}$  NMR (125 MHz,  $\text{CDCl}_3$ )  $\delta$  153.2, 150.0, 133.3, 131.4, 131.3, 130.3 (q,  $J = 43.8$  Hz), 128.6, 128.2, 126.2, 125.4, 121.4, 120.0, 117.8 (q,  $J = 268.8$  Hz), 112.2.  $^{19}\text{F}$  NMR (471 MHz,  $\text{CDCl}_3$ )  $\delta$  -64.94. HRMS (ESI<sup>+</sup>): calc'd for  $\text{C}_{15}\text{H}_9\text{ClF}_3\text{N}_4^+$  [M+H]<sup>+</sup>: 337.0462, found 337.0461.

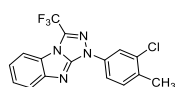

### 1-(3-Chloro-4-methylphenyl)-3-(trifluoromethyl)-1H-benzo[4,5]imidazo[2,1-c][1,2,4]triazole (3r)

Following the general procedure, the desired product **3r** (30.5 mg) was obtained in 87% yield as a pale solid.  $R_f = 0.3$  (PE : EA = 20 : 1).

$^1\text{H}$  NMR (500 MHz,  $\text{CDCl}_3$ )  $\delta$  8.24 (d,  $J = 2.1$  Hz, 1H), 8.11 – 8.09 (m, 1H), 7.83 (d,  $J = 8.2$  Hz, 1H), 7.77 (d,  $J = 8.2$  Hz, 1H), 7.50 (t,  $J = 7.8$  Hz, 1H), 7.40 (d,  $J = 8.2$  Hz, 1H), 7.33 (t,  $J = 7.8$  Hz, 1H), 2.43 (s, 3H).  $^{13}\text{C}$  NMR (125 MHz,  $\text{CDCl}_3$ )  $\delta$  151.5, 149.9, 135.7, 135.5, 134.6, 131.8, 130.0 (q,  $J = 43.8$  Hz), 126.3, 124.7, 121.7, 120.1, 118.5, 117.9 (q,  $J = 267.5$  Hz), 116.0, 112.1, 23.2.  $^{19}\text{F}$  NMR (471 MHz,  $\text{CDCl}_3$ )  $\delta$  -64.79. HRMS (ESI<sup>+</sup>): calc'd for  $\text{C}_{16}\text{H}_{11}\text{ClF}_3\text{N}_4^+$  [M+H]<sup>+</sup>: 351.0619, found 351.0618.

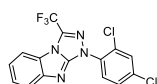

### 1-(2,4-Dichlorophenyl)-3-(trifluoromethyl)-1H-benzo[4,5]imidazo[2,1-c][1,2,4]triazole (3s)

Following the general procedure, the desired product **3s** (21.1 mg) was obtained in 57% yield as a colorless oil.  $R_f = 0.3$  (PE : EA = 20 : 1).

$^1\text{H}$  NMR (500 MHz,  $\text{CDCl}_3$ )  $\delta$  7.82 – 7.74 (m, 2H), 7.65 – 7.63 (m, 2H), 7.51 – 7.44 (m, 2H), 7.33 (t,  $J = 7.8$  Hz, 1H).  $^{13}\text{C}$  NMR (125 MHz,  $\text{CDCl}_3$ )  $\delta$  153.0, 149.9, 136.7, 132.2, 132.0, 131.2, 131.0 (q,  $J = 45.0$  Hz), 129.2, 128.5, 126.3, 125.4, 121.6, 120.1, 117.8 (q,  $J = 268.8$  Hz), 112.2.  $^{19}\text{F}$  NMR (471 MHz,  $\text{CDCl}_3$ )  $\delta$  -65.00. HRMS (ESI<sup>+</sup>): calc'd for  $\text{C}_{15}\text{H}_8\text{Cl}_2\text{F}_3\text{N}_4^+$  [M+H]<sup>+</sup>: 371.0073, found 371.0073.

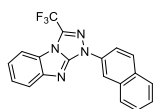

**1-(Naphthalen-2-yl)-3-(trifluoromethyl)-1H-benzo[4,5]imidazo[2,1-c][1,2,4]triazole (3t)**

Following the general procedure, the desired product **3t** (17.6 mg) was obtained in 50% yield as a pale solid.  $R_f = 0.4$  (PE : EA = 20 : 1).

$^1\text{H}$  NMR (500 MHz,  $\text{CDCl}_3$ )  $\delta$  8.63 (d,  $J = 1.5$  Hz, 1H), 8.28 (dd,  $J = 8.9, 2.1$  Hz, 1H), 7.94 – 7.88 (m, 2H), 7.78 (t,  $J = 8.6$  Hz, 2H), 7.70 (d,  $J = 8.2$  Hz, 1H), 7.48 – 7.38 (m, 3H), 7.24 (t,  $J = 7.8$  Hz, 1H).  $^{13}\text{C}$  NMR (125 MHz,  $\text{CDCl}_3$ )  $\delta$  151.7, 150.0, 134.5, 133.5, 131.7, 129.9, 129.8 (q,  $J = 45.0$  Hz), 128.3, 127.9, 127.3, 126.3, 126.2, 124.6, 121.5, 120.1, 118.0 (q,  $J = 268.8$  Hz), 116.8, 115.4, 112.1.  $^{19}\text{F}$  NMR (471 MHz,  $\text{CDCl}_3$ )  $\delta$  -64.70. HRMS (ESI<sup>+</sup>): calc'd for  $\text{C}_{19}\text{H}_{12}\text{F}_3\text{N}_4^+$  [M+H]<sup>+</sup>: 353.1009, found 353.1009.

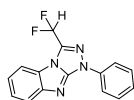

**3-(Difluoromethyl)-1-phenyl-1H-benzo[4,5]imidazo[2,1-c][1,2,4]triazole (3u)**

Following the general procedure, the desired product **3u** (26.1 mg) was obtained in 92% yield as a pale solid.  $R_f = 0.4$  (PE : EA = 20 : 1).

$^1\text{H}$  NMR (500 MHz,  $\text{CDCl}_3$ )  $\delta$  8.26 – 8.20 (m, 2H), 7.83 (dd,  $J = 16.8, 8.2$  Hz, 2H), 7.58 – 7.52 (m, 2H), 7.49 – 7.44 (m, 1H), 7.36 – 7.27 (m, 2H), 7.01 (t,  $J = 52.0$  Hz, 1H).  $^{13}\text{C}$  NMR (125 MHz,  $\text{CDCl}_3$ )  $\delta$  151.8, 150.0, 137.3, 133.8 (t,  $J = 31.3$  Hz), 129.7, 126.3, 125.9, 124.9, 121.2, 119.7, 117.7, 112.8, 108.1 (t,  $J = 235.0$  Hz).  $^{19}\text{F}$  NMR (471 MHz,  $\text{CDCl}_3$ )  $\delta$  -116.67 (d,  $J = 52.0$  Hz). HRMS (ESI<sup>+</sup>)  $m/z$  calc'd for  $\text{C}_{15}\text{H}_{11}\text{F}_2\text{N}_4^+$  [M+H]<sup>+</sup>: 285.0946, found 285.0945.

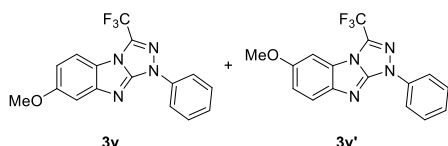

**7-Methoxy-1-phenyl-3-(trifluoromethyl)-1H-benzo[4,5]imidazo[2,1-c][1,2,4]triazole (3v)** and

**6-Methoxy-1-phenyl-3-(trifluoromethyl)-1H-benzo[4,5]imidazo[2,1-c][1,2,4]triazole (3v')**

### ole (3v')

Following the general procedure, a mixture of **3v** and **3v'** (29.4 mg) was obtained in 88% yield as a pale solid with approximately a ratio of 1:1.1.  $R_f = 0.3$  (PE : EA = 20 : 1).

$^1\text{H}$  NMR (500 MHz,  $\text{CDCl}_3$ )  $\delta$  8.41 – 8.19 (m, 3.6H), 7.74 (d,  $J = 8.8$  Hz, 0.85H), 7.65 (d,  $J = 8.8$  Hz, 1.09H), 7.62 – 7.49 (t,  $J = 7.2$  Hz, 3.69H), 7.40 – 7.30 (m, 3.28H), 7.26 (s, 0.77H), 7.14 (d,  $J = 8.8$  Hz, 0.74H), 6.93 (d,  $J = 8.8$  Hz, 1H), 3.925 (s, 2.91H), 3.920 (s, 2.62H).  $^{13}\text{C}$  NMR (125 MHz,  $\text{CDCl}_3$ )  $\delta$  158.6, 155.2, 152.1, 151.2, 144.0, 137.1, 137.0, 129.7, 129.3 (q,  $J = 43.8$  Hz), 126.6, 126.4, 124.7, 120.4, 119.0, 118.0 (q,  $J = 267.5$  Hz), 117.9, 117.7, 114.7, 112.5, 110.7, 102.4, 96.4, 56.2, 55.8.  $^{19}\text{F}$  NMR (471 MHz,  $\text{CDCl}_3$ )  $\delta$  -64.48, -64.74. HRMS (ESI<sup>+</sup>)  $m/z$  calc'd for  $\text{C}_{16}\text{H}_{12}\text{F}_3\text{N}_4\text{O}^+$  [M+H]<sup>+</sup>: 333.0958, found 333.0958.

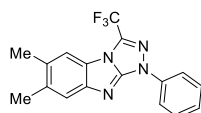

### 6,7-Dimethyl-1-phenyl-3-(trifluoromethyl)-1H-benzo[4,5]imidazo[2,1-c][1,2,4]triazole (3w)

Following the general procedure, the desired product **3w** (31.2 mg) was obtained in 95% yield as a pale solid.  $R_f = 0.4$  (PE : EA = 20 : 1).

$^1\text{H}$  NMR (500 MHz,  $\text{CDCl}_3$ )  $\delta$  8.22 (d,  $J = 7.9$  Hz, 2H), 7.58 – 7.50 (m, 3H), 7.47 (s, 1H), 7.31 (t,  $J = 7.4$  Hz, 1H), 2.39 (s, 3H), 2.38 (s, 3H).  $^{13}\text{C}$  NMR (125 MHz,  $\text{CDCl}_3$ )  $\delta$  151.4, 148.3, 137.2, 135.3, 130.6, 129.7, 129.5 (q,  $J = 41.3$  Hz), 126.4, 122.9, 120.1, 118.0 (q,  $J = 268.8$  Hz), 117.8, 112.1, 20.7, 20.5.  $^{19}\text{F}$  NMR (471 MHz,  $\text{CDCl}_3$ )  $\delta$  -64.76. HRMS (ESI<sup>+</sup>)  $m/z$  calc'd for  $\text{C}_{17}\text{H}_{14}\text{F}_3\text{N}_4^+$  [M+H]<sup>+</sup>: 331.1165, found 331.1163.

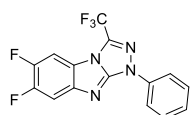

### 6,7-Difluoro-1-phenyl-3-(trifluoromethyl)-1H-benzo[4,5]imidazo[2,1-c][1,2,4]triazole (3x)

Following the general procedure, the desired product **3x** (27.7 mg) was obtained in 82% yield as a pale solid.  $R_f = 0.4$  (PE : EA = 20 : 1).

$^1\text{H}$  NMR (500 MHz,  $\text{CDCl}_3$ )  $\delta$  8.19 (d,  $J$  = 7.8 Hz, 2H), 7.64 – 7.51 (m, 4H), 7.37 – 7.31 (m, 1H).  $^{13}\text{C}$  NMR (125 MHz,  $\text{CDCl}_3$ )  $\delta$  152.5, 149.9 (d,  $J$  = 245.0, 13.8 Hz), 146.5 (dd,  $J$  = 242.5, 15.0 Hz), 145.6 (dd,  $J$  = 11.3, 1.3 Hz), 136.7, 129.8, 129.3 (q,  $J$  = 43.8 Hz), 127.0, 119.5 (dd,  $J$  = 10.0, 1.2 Hz), 117.9, 117.8 (q,  $J$  = 268.8 Hz), 107.8 (d,  $J$  = 20.0 Hz), 100.9 (d,  $J$  = 23.8 Hz).  $^{19}\text{F}$  NMR (471 MHz,  $\text{CDCl}_3$ )  $\delta$  -64.49, -137.17, -142.13. HRMS (ESI $^+$ )  $m/z$  calc'd for  $\text{C}_{15}\text{H}_8\text{F}_5\text{N}_4^+[\text{M}+\text{H}]^+$ : 339.0664, found 339.0664.

#### 4. Gram-scale Reaction and Derivatizations of **3j**

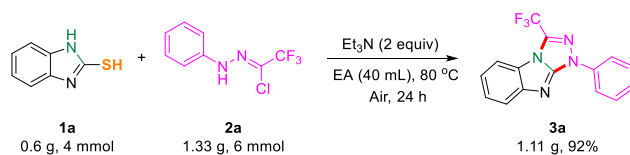

A mixture of 1*H*-benzo[*d*]imidazole-2-thiol **1** (0.61 g, 4 mmol, 1 equiv.), nitrile imines **2a** (1.33 g, 6 mmol, 1.5 equiv.),  $\text{Et}_3\text{N}$  (1.11 mL, 8 mmol, 2 equiv.), and EA (40 mL) was added to a 100 mL round-bottom flask, and the mixture was stirred at 80 °C for 24 hours. After the reaction was completed, the mixture was diluted with EA and filtered. The filtrates were concentrated under reduced pressure to give a crude residue which was purified by flash column chromatography to provide 1.11 g of **3a** in 92% yield as a pale solid.

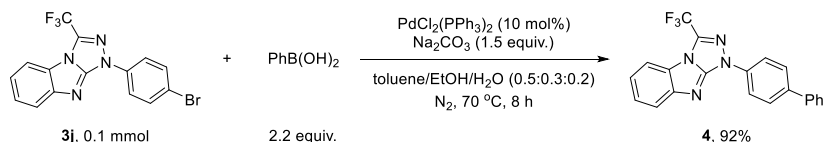

According to literature,<sup>3</sup> under  $\text{N}_2$  atmosphere, a mixture of **3j** (37.9 mg, 0.1 mmol, 1 equiv.),  $\text{PhB(OH)}_2$  (26.8 mg, 0.22 mmol, 2.2 equiv.),  $\text{PdCl}_2(\text{PPh}_3)_2$  (7.2 mg, 0.01 mmol, 0.1 equiv.),  $\text{Na}_2\text{CO}_3$  (17.0 mg, 0.15 mmol, 1.5 equiv.), and toluene:EtOH: $\text{H}_2\text{O}$  (degassed)(0.5 mL: 0.3 mL: 0.2 mL) were added to a 10 mL-Schlenk tube, subsequently, the sealed tube was stirred at 70 °C for 8 h. After the reaction was finished, the solution was evaporated under reduced pressure to give the crude product which was purified by flash column chromatography to provide compound **4** as a colorless oil in 92% yield.  $R_f$  = 0.3 (PE : EA = 20 : 1).  $^1\text{H}$  NMR (500 MHz,  $\text{CDCl}_3$ )  $\delta$  8.32 (d,  $J$  = 8.6 Hz, 2H), 7.85 (d,  $J$  = 8.2 Hz, 1H), 7.81 – 7.74 (m, 3H), 7.63

(d,  $J = 7.2$  Hz, 2H), 7.54 – 7.44 (m, 3H), 7.38 (t,  $J = 7.2$  Hz, 1H), 7.33 (t,  $J = 7.8$  Hz, 1H).  $^{13}\text{C}$  NMR (125 MHz,  $\text{CDCl}_3$ )  $\delta$  151.7, 150.0, 140.1, 139.6, 136.2, 129.9 (q,  $J = 43.8$  Hz), 129.1, 128.3, 127.8, 127.2, 126.3, 124.7, 121.5, 120.1, 118.3, 118.0 (q,  $J = 268.8$  Hz), 112.2.  $^{19}\text{F}$  NMR (471 MHz,  $\text{CDCl}_3$ )  $\delta$  -64.74. HRMS (ESI<sup>+</sup>): calc'd for  $\text{C}_{21}\text{H}_{14}\text{F}_3\text{N}_4^+$  [M+H]<sup>+</sup>: 379.1165, found 379.1164.

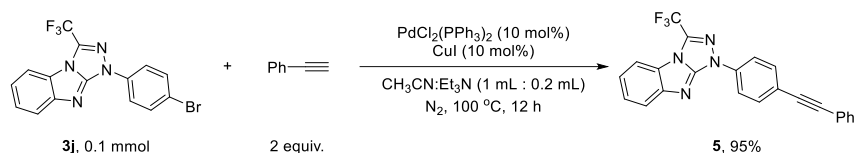

According to literature,<sup>4</sup> under  $\text{N}_2$  atmosphere, a mixture of **3j** (38.1 mg, 0.1 mmol, 1 equiv.), phenylacetylene (22  $\mu\text{L}$ , 0.2 mmol, 2 equiv.),  $\text{PdCl}_2(\text{PPh}_3)_2$  (7.0 mg, 0.01 mmol, 0.1 equiv.),  $\text{CuI}$  (2.1 mg, 0.01 mmol, 0.1 equiv.), and  $\text{CH}_3\text{CN}:\text{Et}_3\text{N}$  (1 mL: 0.2 mL) were added to a 10 mL-Schlenk tube, subsequently, the sealed tube was stirred at 100 °C for 12 h. After the reaction was finished, the solution was evaporated under reduced pressure to give the crude product which was purified by flash column chromatography to provide compound **5** as a colorless oil in 95% yield.  $R_f = 0.4$  (PE : EA = 20 : 1).  $^1\text{H}$  NMR (500 MHz,  $\text{CDCl}_3$ )  $\delta$  8.26 (d,  $J = 8.6$  Hz, 2H), 7.84 (d,  $J = 8.2$  Hz, 1H), 7.76 (d,  $J = 8.2$  Hz, 1H), 7.70 (d,  $J = 8.6$  Hz, 2H), 7.58 – 7.52 (m, 2H), 7.50 (t,  $J = 7.8$  Hz, 1H), 7.40 – 7.29 (m, 4H).  $^{13}\text{C}$  NMR (125 MHz,  $\text{CDCl}_3$ )  $\delta$  151.5, 149.9, 136.5, 133.0, 131.8, 130.1 (q,  $J = 45.0$  Hz), 128.6, 128.5, 126.3, 124.6, 123.1, 121.7, 121.6, 120.1, 117.9 (q,  $J = 268.8$  Hz), 117.7, 112.1, 90.5, 88.7.  $^{19}\text{F}$  NMR (471 MHz,  $\text{CDCl}_3$ )  $\delta$  -64.80. HRMS (ESI<sup>+</sup>): calc'd for  $\text{C}_{23}\text{H}_{14}\text{F}_3\text{N}_4^+$  [M+H]<sup>+</sup>: 403.1165, found 403.1166.

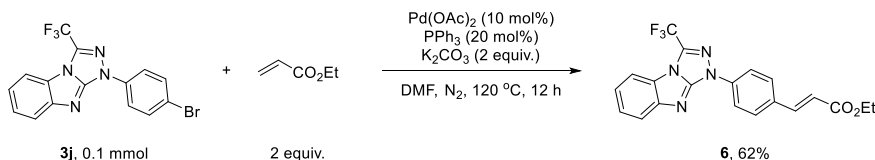

Following the literature,<sup>5</sup> under  $\text{N}_2$  atmosphere, a mixture of **3j** (38.0 mg, 0.1 mmol, 1 equiv.), ethyl acrylate (22  $\mu\text{L}$ , 0.2 mmol, 2 equiv.),  $\text{Pd}(\text{OAc})_2$  (2.3 mg, 0.01 mmol, 0.1 equiv.),  $\text{PPh}_3$  (5.3 mg, 0.02 mmol, 0.2 equiv.),  $\text{K}_2\text{CO}_3$  (28.0 mg, 0.2 mmol, 2 equiv.), and DMF (1 mL) were added to a 10 mL-Schlenk tube, subsequently, the sealed tube was stirred at 120 °C for 12 h. After the reaction was finished, the solution was added

water (15 mL) and extracted by EA (15 mL x 3). The combined organic phase was dried by anhydrous Na<sub>2</sub>SO<sub>4</sub> and filtered. The filtrates were evaporated under reduced pressure to give the crude product which was purified by flash column chromatography to provide compound **6** as a colorless oil in 62% yield.  $R_f = 0.2$  (PE : EA = 10 : 1). <sup>1</sup>H NMR (500 MHz, CDCl<sub>3</sub>) δ 8.31 (d,  $J = 8.6$  Hz, 2H), 7.84 (d,  $J = 8.2$  Hz, 1H), 7.78 (d,  $J = 8.2$  Hz, 1H), 7.72 – 7.68 (m, 3H), 7.51 (t,  $J = 7.8$  Hz, 1H), 7.34 (t,  $J = 7.8$  Hz, 1H), 6.48 (d,  $J = 16.0$  Hz, 1H), 4.29 (q,  $J = 7.2$  Hz, 2H), 1.36 (t,  $J = 7.2$  Hz, 3H). <sup>13</sup>C NMR (125 MHz, CDCl<sub>3</sub>) δ 167.0, 151.6, 149.9, 143.3, 138.2, 132.8, 130.3 (q,  $J = 45.0$  Hz), 129.5, 126.4, 124.7, 121.9, 120.2, 118.9, 118.1, 117.9 (q,  $J = 268.8$  Hz), 112.2, 60.8, 14.5. <sup>19</sup>F NMR (471 MHz, CDCl<sub>3</sub>) δ -64.85. HRMS (ESI<sup>+</sup>): calc'd for C<sub>20</sub>H<sub>16</sub>F<sub>3</sub>N<sub>4</sub>O<sub>2</sub><sup>+</sup> [M+H]<sup>+</sup>: 401.1220, found 401.1221.

## 5. X-ray Crystallography Data of 3f

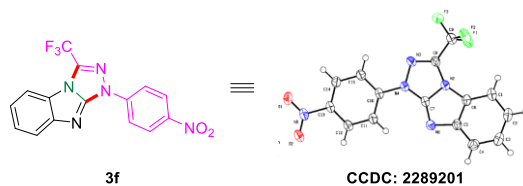

|                                             |                                                                             |
|---------------------------------------------|-----------------------------------------------------------------------------|
| Identification code                         | 2289201                                                                     |
| Empirical formula                           | C <sub>15</sub> H <sub>8</sub> F <sub>3</sub> N <sub>5</sub> O <sub>2</sub> |
| Formula weight                              | 347.26                                                                      |
| Temperature/K                               | 170.00                                                                      |
| Crystal system                              | monoclinic                                                                  |
| Space group                                 | P2 <sub>1</sub> /n                                                          |
| a/Å                                         | 5.0516(6)                                                                   |
| b/Å                                         | 25.263(3)                                                                   |
| c/Å                                         | 11.1686(13)                                                                 |
| α/°                                         | 90                                                                          |
| β/°                                         | 101.502(4)                                                                  |
| γ/°                                         | 90                                                                          |
| Volume/Å <sup>3</sup>                       | 1396.7(3)                                                                   |
| Z                                           | 4                                                                           |
| ρ <sub>calc</sub> /cm <sup>3</sup>          | 1.651                                                                       |
| μ/mm <sup>-1</sup>                          | 0.142                                                                       |
| F(000)                                      | 704.0                                                                       |
| Crystal size/mm <sup>3</sup>                | 0.42 × 0.16 × 0.15                                                          |
| Radiation                                   | MoKα (λ = 0.71073)                                                          |
| 2θ range for data collection/°              | 4.056 to 55.176                                                             |
| Index ranges                                | -6 ≤ h ≤ 6, -32 ≤ k ≤ 29, -14 ≤ l ≤ 14                                      |
| Reflections collected                       | 13208                                                                       |
| Independent reflections                     | 3219 [R <sub>int</sub> = 0.0475, R <sub>sigma</sub> = 0.0404]               |
| Data/restraints/parameters                  | 3219/0/226                                                                  |
| Goodness-of-fit on F <sup>2</sup>           | 1.162                                                                       |
| Final R indexes [I ≥ 2σ (I)]                | R <sub>1</sub> = 0.0663, wR <sub>2</sub> = 0.1271                           |
| Final R indexes [all data]                  | R <sub>1</sub> = 0.0938, wR <sub>2</sub> = 0.1430                           |
| Largest diff. peak/hole / e Å <sup>-3</sup> | 0.26/-0.28                                                                  |



## 6. References

1. D. Wang, X. Wan, Y. Zhou, J. Liu, J. Cai and G.-J. Deng, *Asian J. Org. Chem.*, 2023, **12**, e202200674.
2. (a) Y. Zhang, J.-L. Zeng, Z. Chen and R. Wang, *J. Org. Chem.*, 2022, **87**, 14514–14522; (b) Y. Zhou, C.-F. Gao, H. Ma, J. Nie, J.-A. Ma and F.-G. Zhang, *Chem.–Asian J.*, 2022, **17**, e202200436.
3. N. Miyaura, T. Yanagi and A. Suzuki, *Synth. Commun.*, 1981, **11**, 513–519.
4. D. Wang, F. Zhang, F. Xiao and G.-J. Deng, *Org. Biomol. Chem.*, 2019, **17**, 9163–9168.
5. J. Wang, P.-B. Bai and S.-D. Yang, *Chin. Chem. Lett.*, 2022, **33**, 2397–2401.

## 7. NMR Spectra

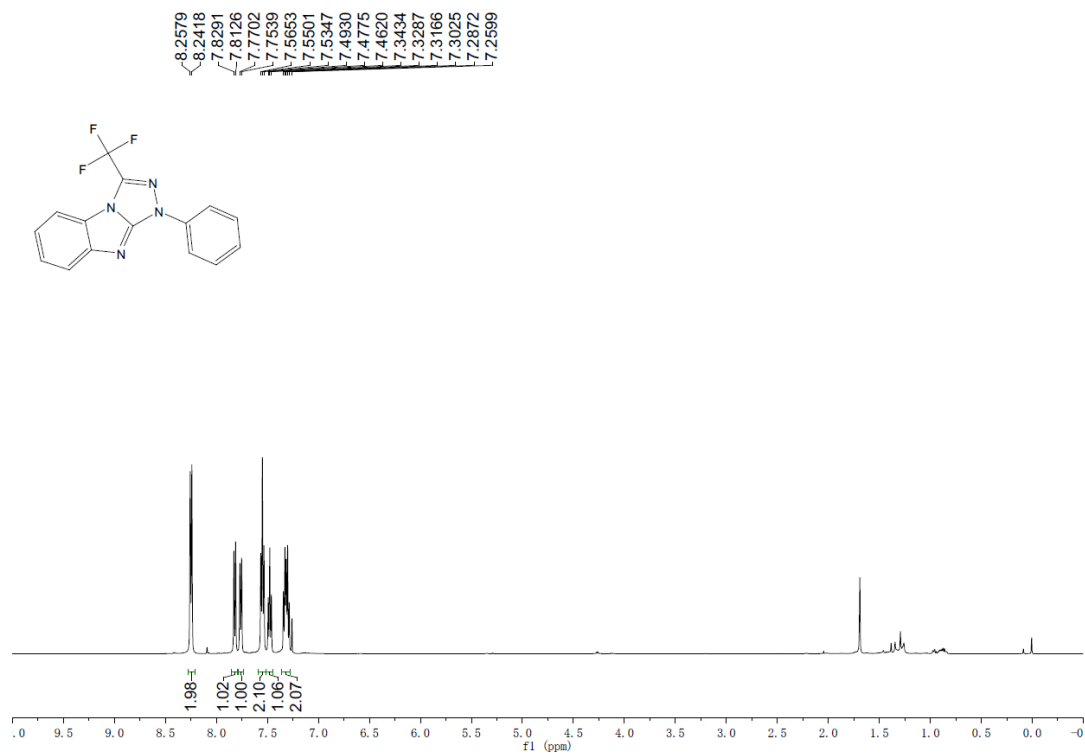

$^1\text{H}$  NMR (500 MHz,  $\text{CDCl}_3$ ) of **3a**.

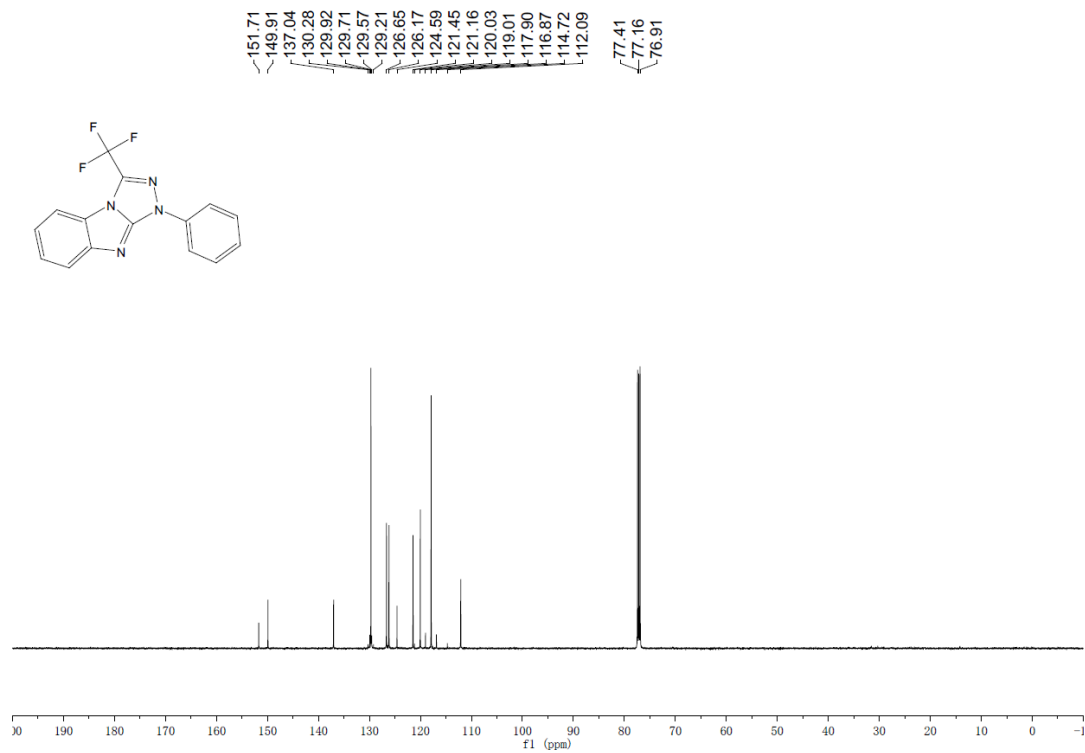

$^{13}\text{C}$  NMR (125 MHz,  $\text{CDCl}_3$ ) of **3a**.

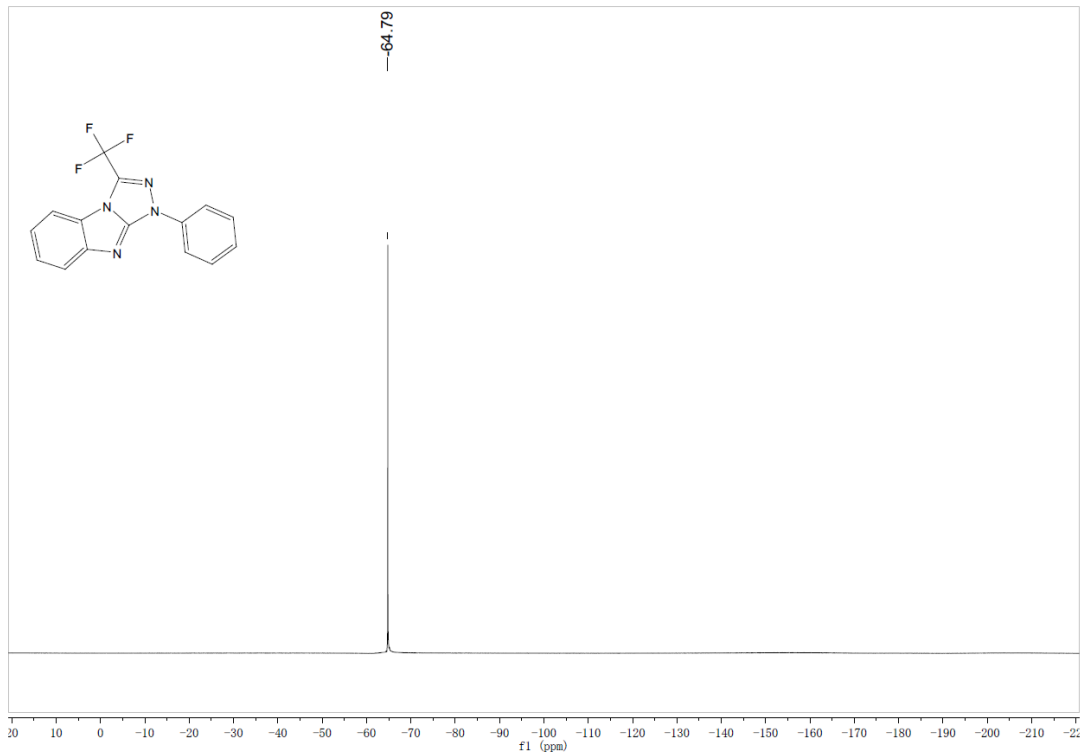

$^{19}\text{F}$  NMR (471 MHz,  $\text{CDCl}_3$ ) of **3a**.

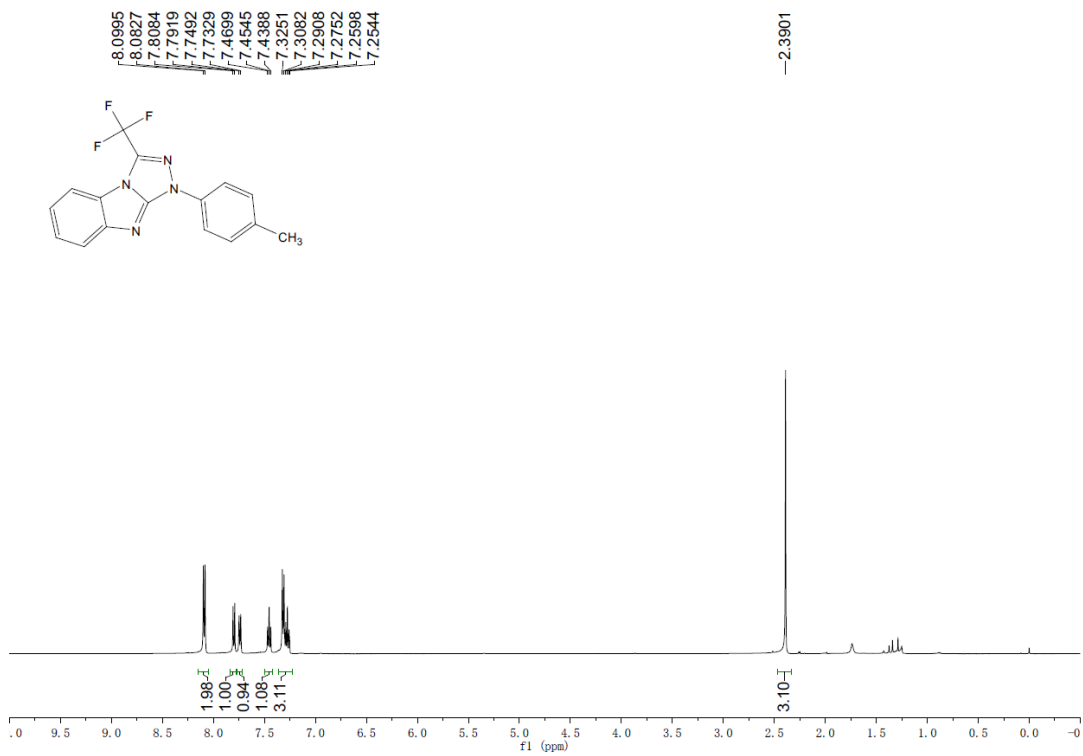

$^1\text{H}$  NMR (500 MHz,  $\text{CDCl}_3$ ) of **3b**.

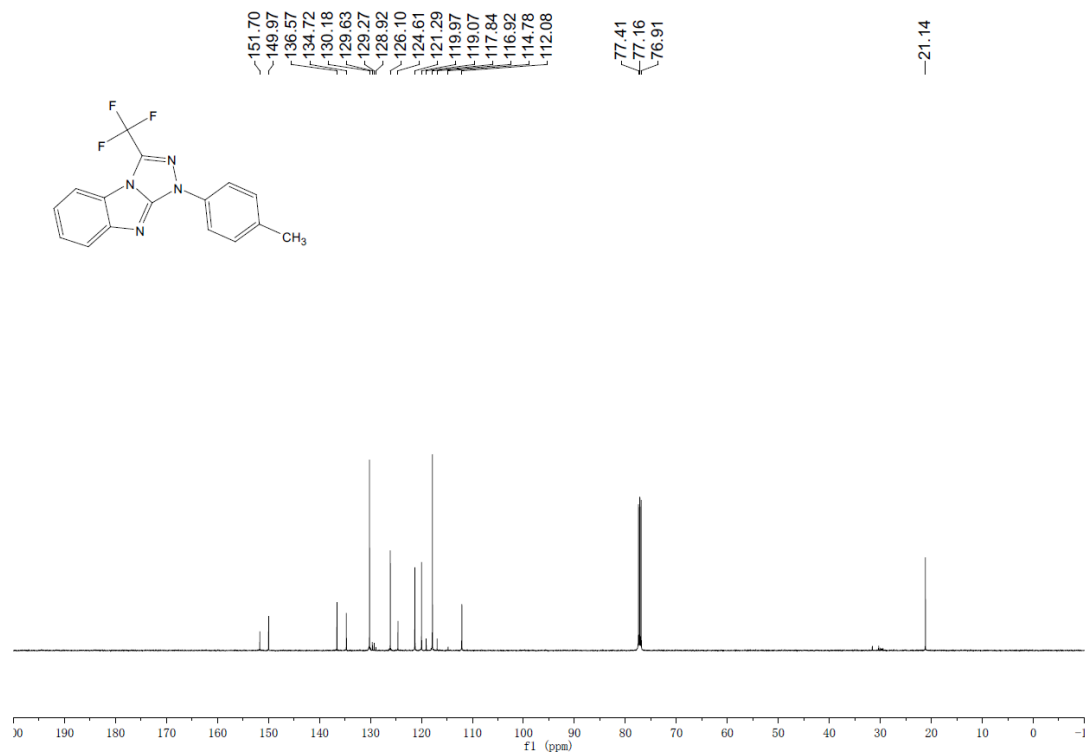

$^{13}\text{C}$  NMR (125 MHz,  $\text{CDCl}_3$ ) of **3b**.

CKL-1-87-6

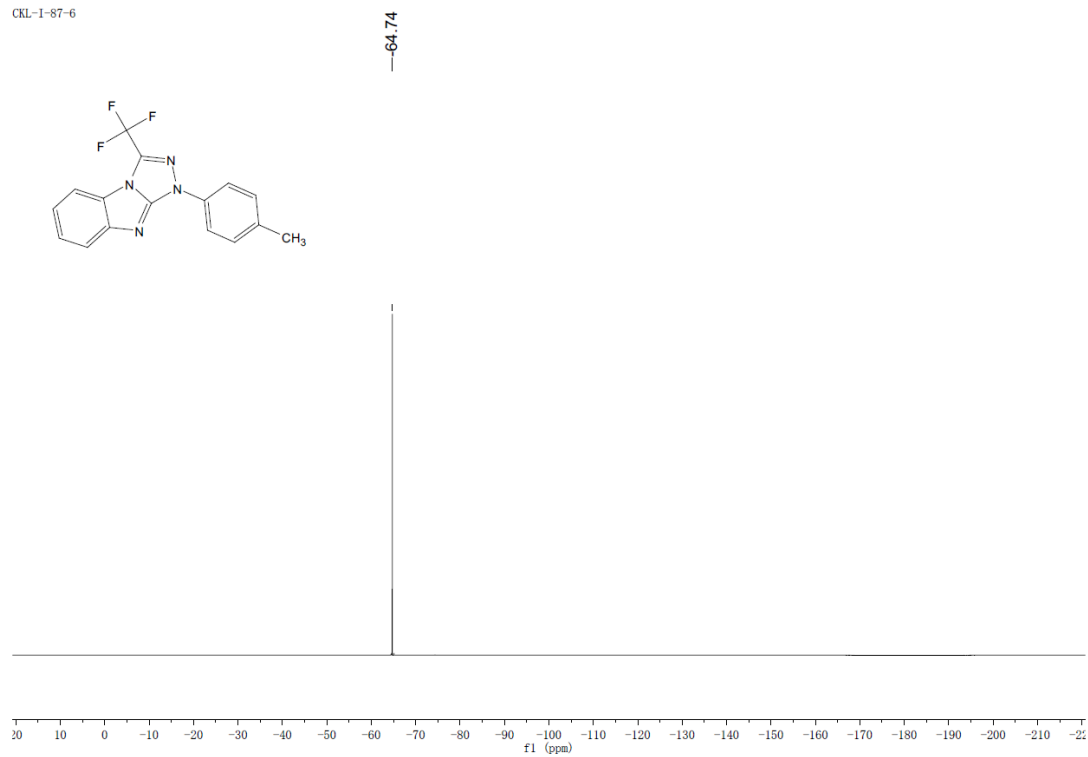

$^{19}\text{F}$  NMR (471 MHz,  $\text{CDCl}_3$ ) of **3b**.

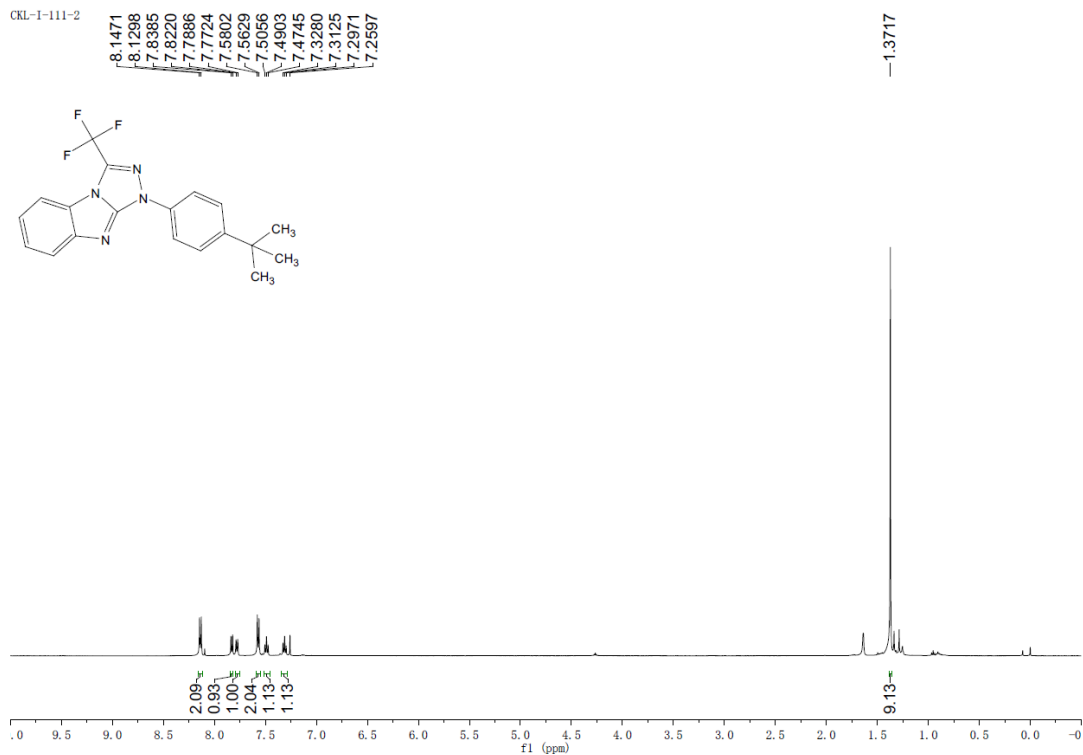

$^1\text{H}$  NMR (500 MHz,  $\text{CDCl}_3$ ) of **3c**.

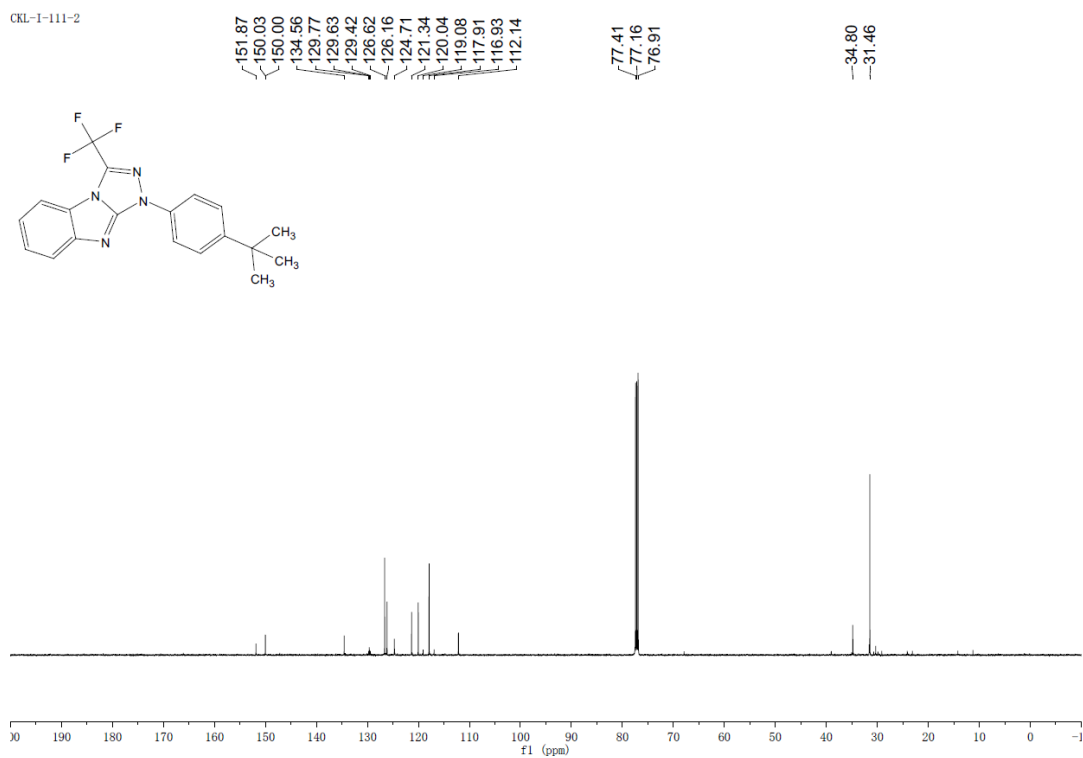

$^{13}\text{C}$  NMR (125 MHz,  $\text{CDCl}_3$ ) of **3c**.

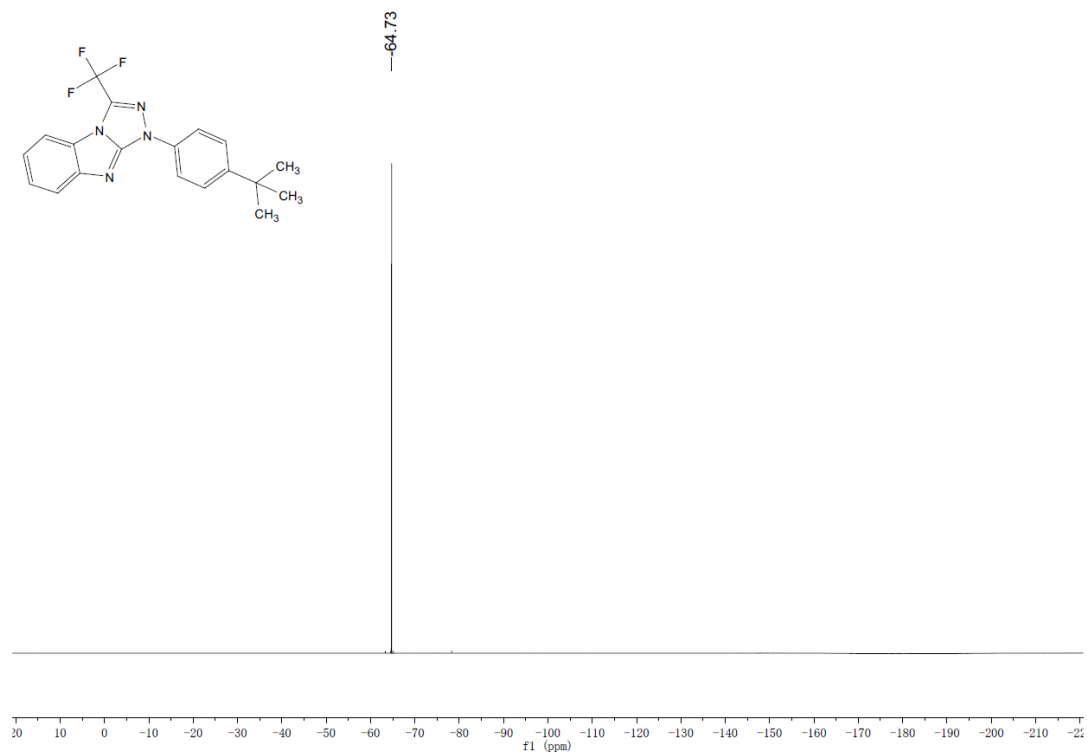

$^{19}\text{F}$  NMR (471 MHz,  $\text{CDCl}_3$ ) of **3c**.

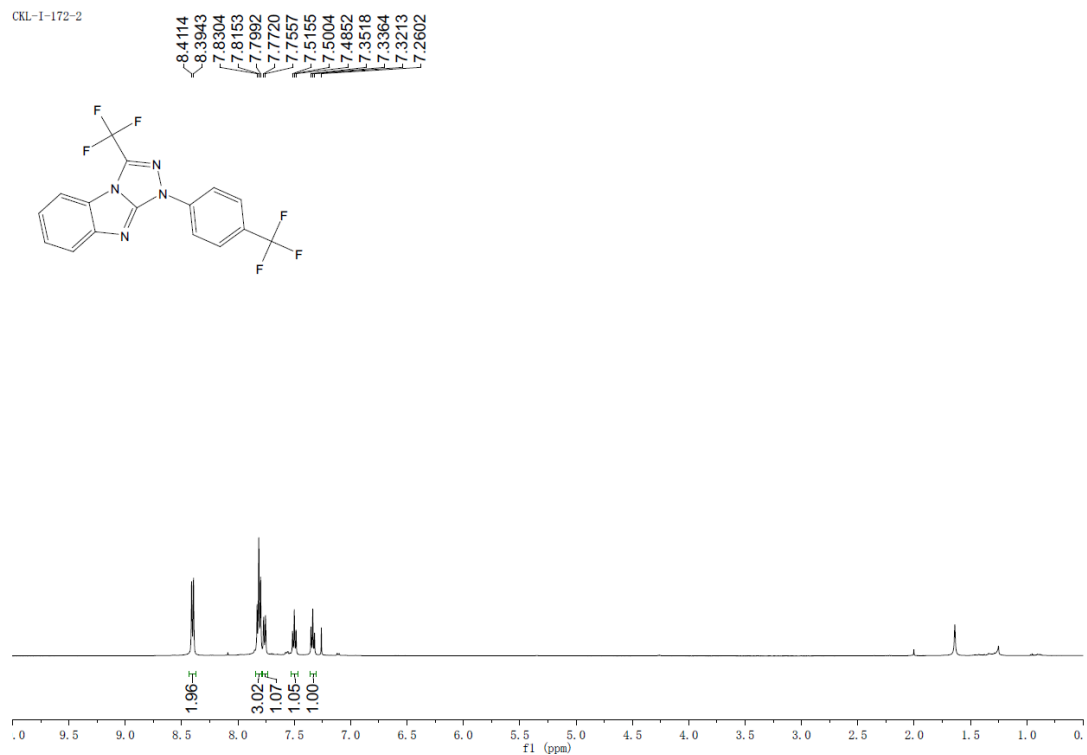

$^1\text{H}$  NMR (500 MHz,  $\text{CDCl}_3$ ) of **3d**.

CKL-1-172-2

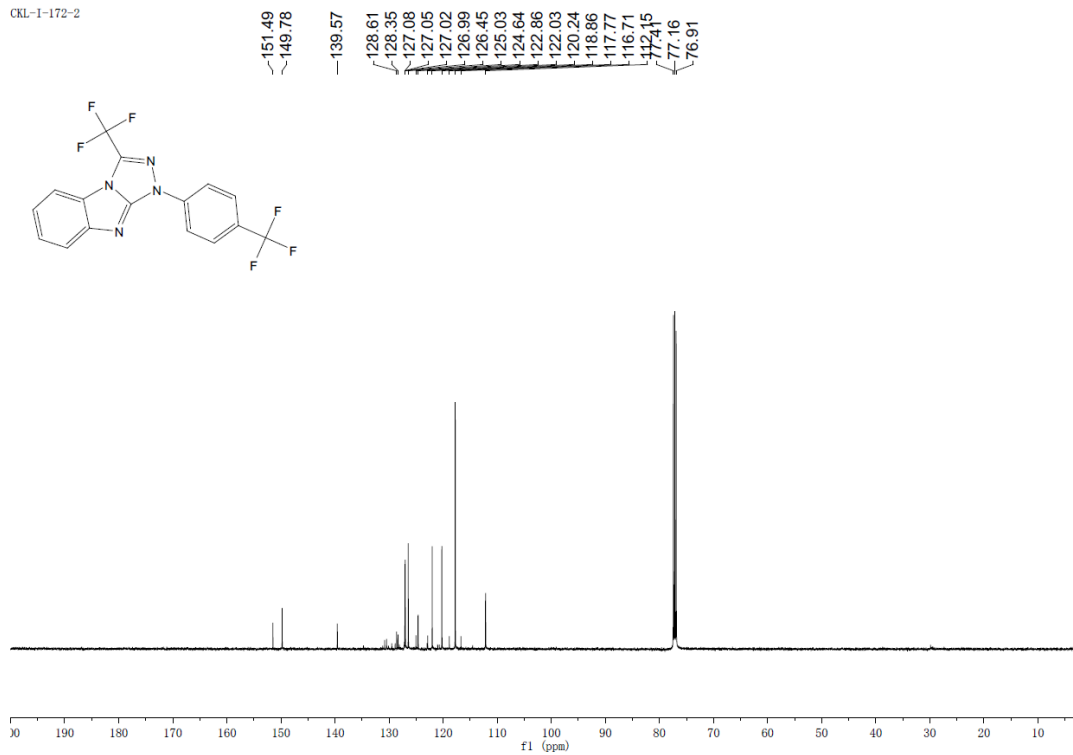

$^{13}\text{C}$  NMR (125 MHz,  $\text{CDCl}_3$ ) of **3d**.

CKL-1-172-2

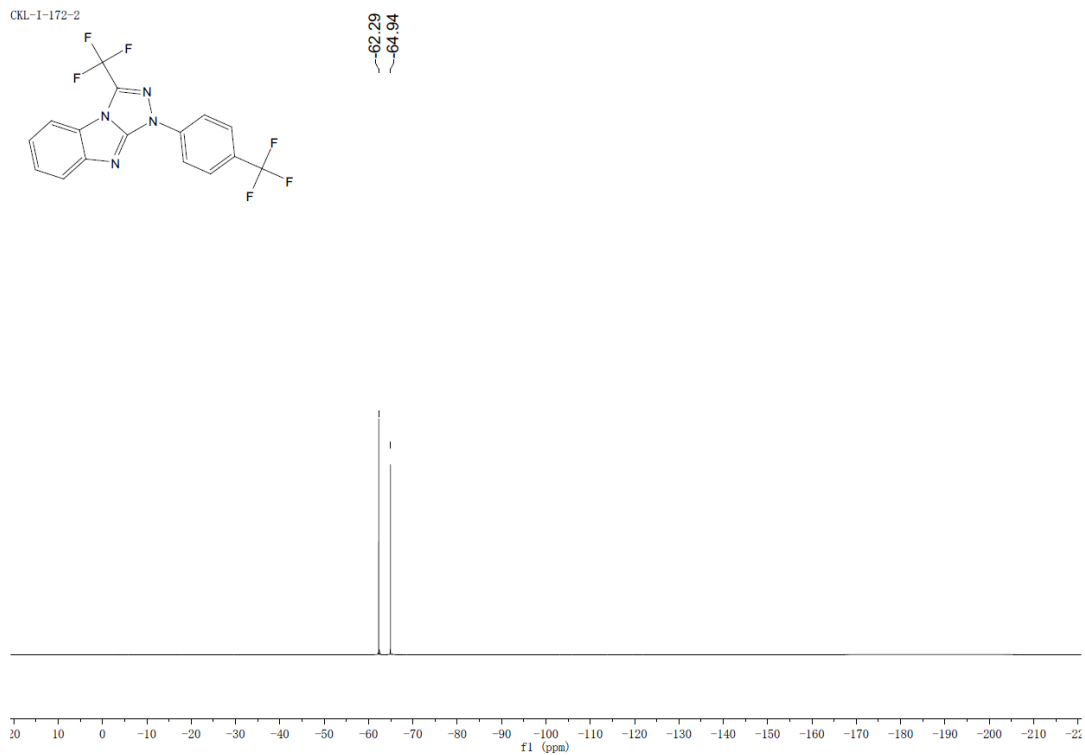

$^{19}\text{F}$  NMR (471 MHz,  $\text{CDCl}_3$ ) of **3d**.

CEL-1-64-1-H-2

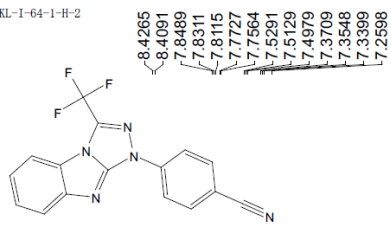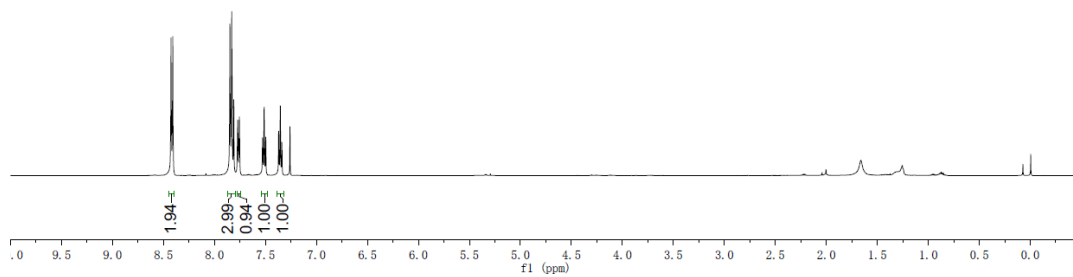

$^1\text{H}$  NMR (500 MHz,  $\text{CDCl}_3$ ) of **3e**.

CEL-1-64-1-H-2

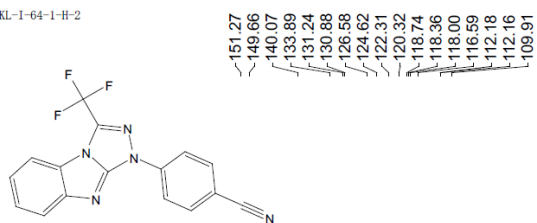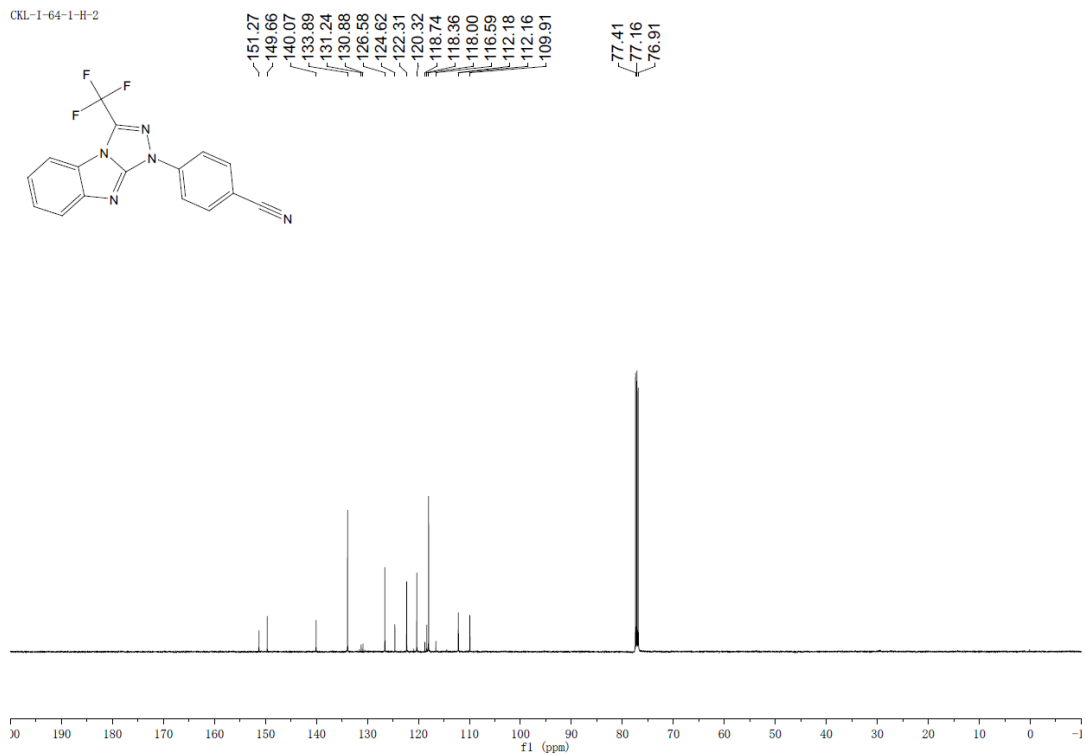

$^{13}\text{C}$  NMR (125 MHz,  $\text{CDCl}_3$ ) of **3e**.



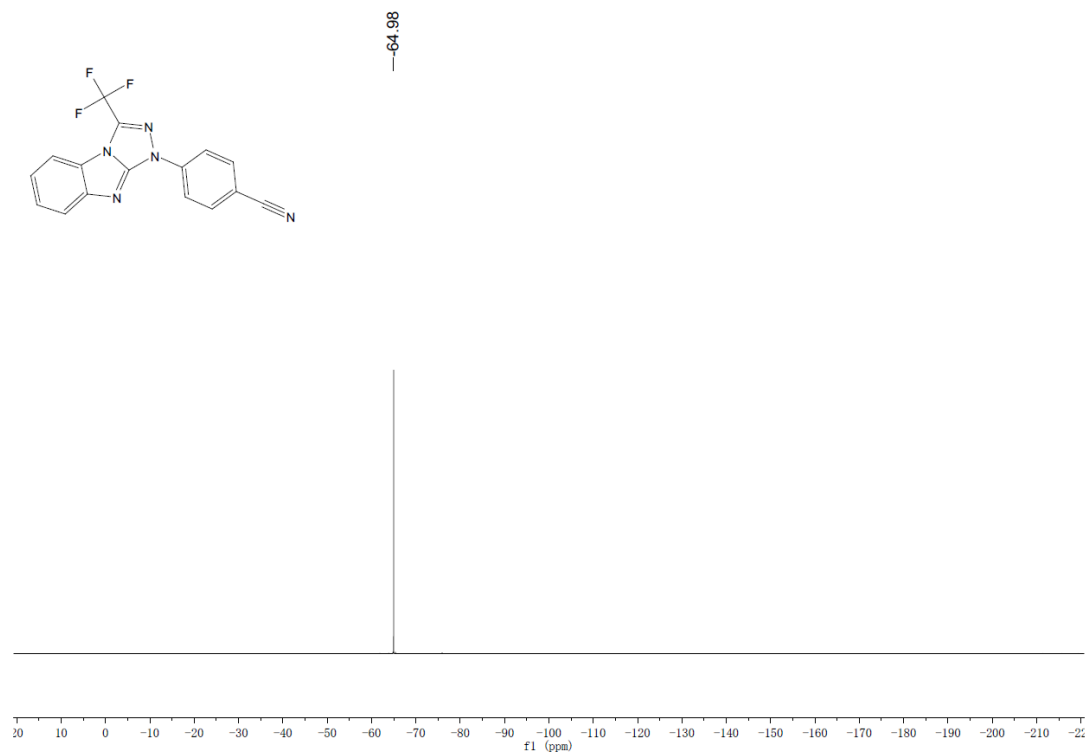

$^{19}\text{F}$  NMR (471 MHz,  $\text{CDCl}_3$ ) of **3e**.

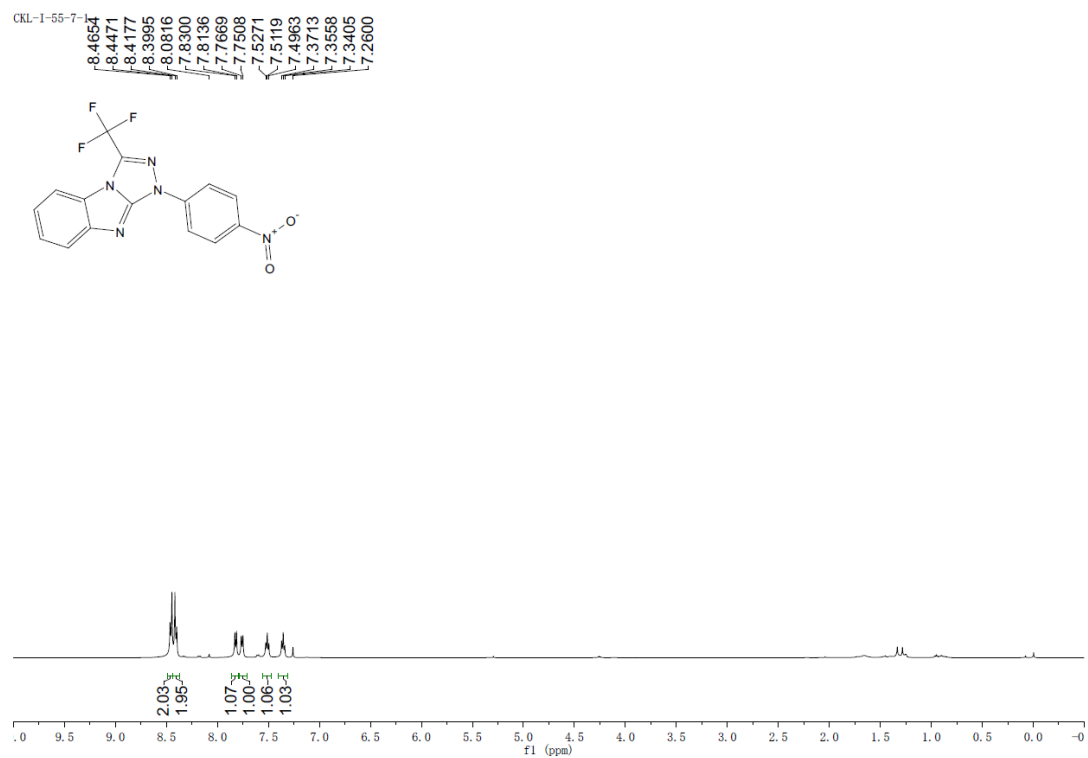

$^1\text{H}$  NMR (500 MHz,  $\text{CDCl}_3$ ) of **3f**.

CKL-1-55-7-1

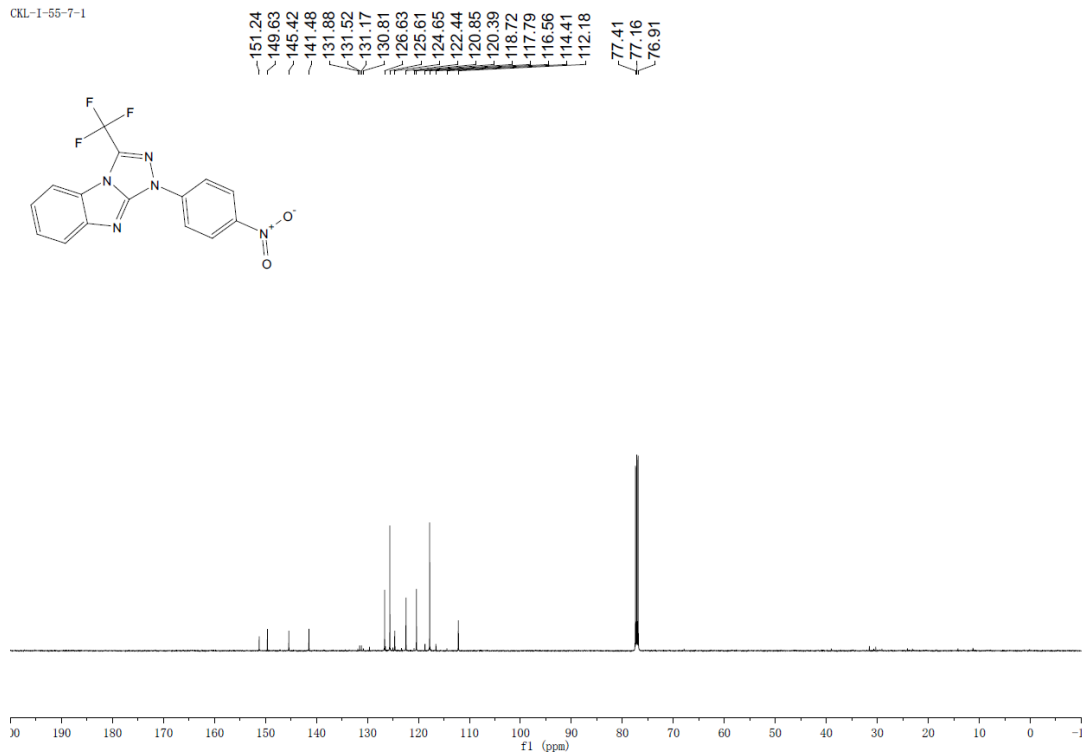

CKL-1-55-7-1

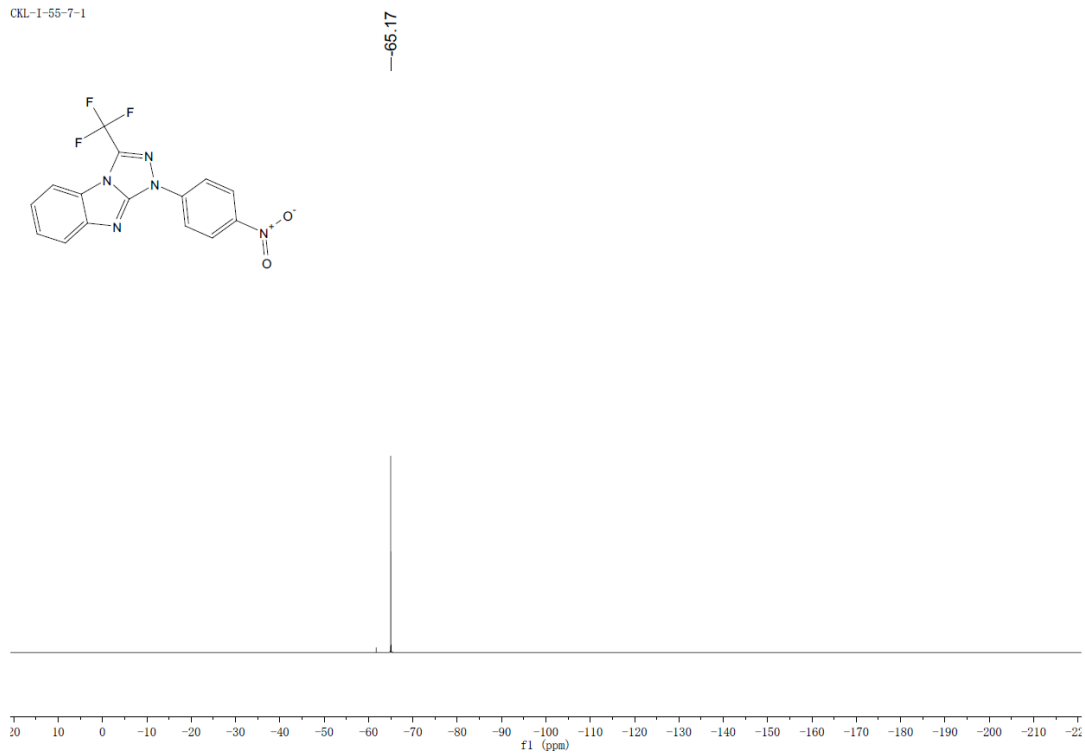

CEL-1-87-4

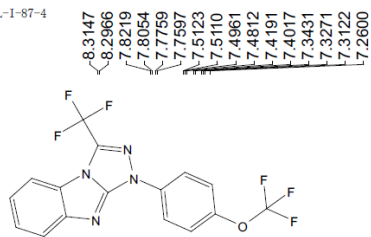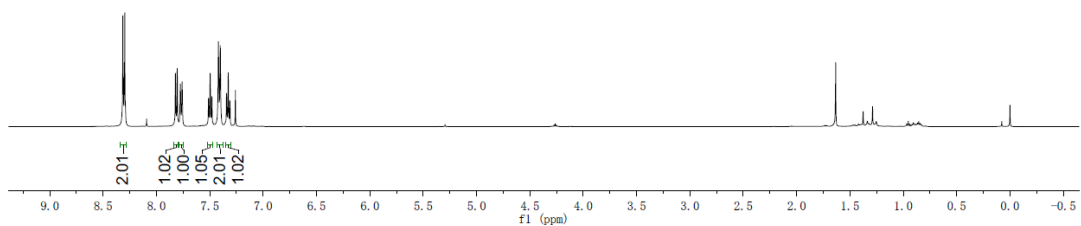

$^1\text{H}$  NMR (500 MHz,  $\text{CDCl}_3$ ) of **3g**.

CEL-1-87-4

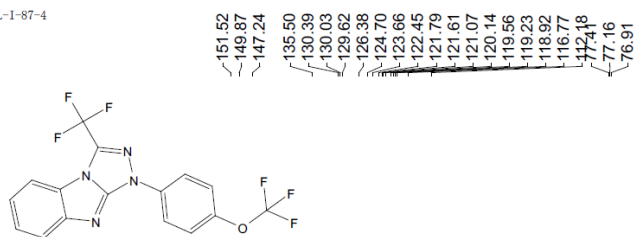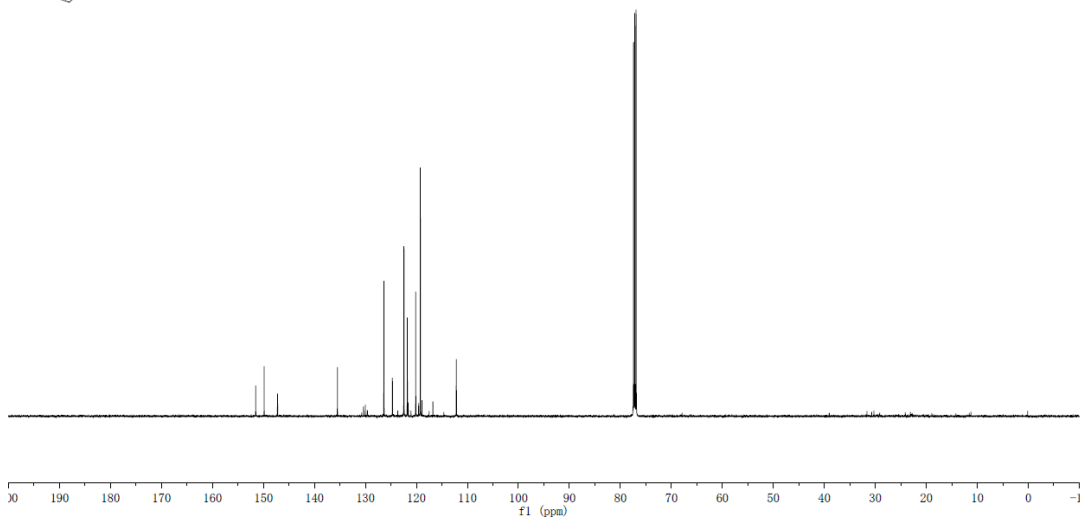

$^{13}\text{C}$  NMR (125 MHz,  $\text{CDCl}_3$ ) of **3g**.

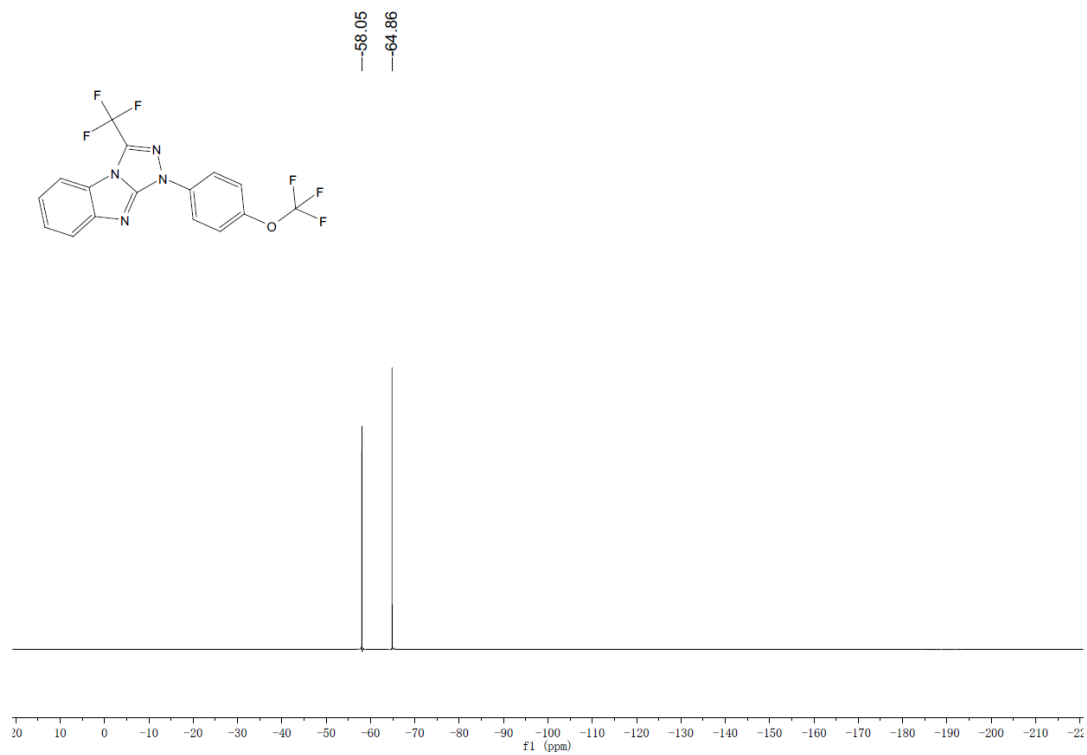

$^{19}\text{F}$  NMR (471 MHz,  $\text{CDCl}_3$ ) of **3g**.

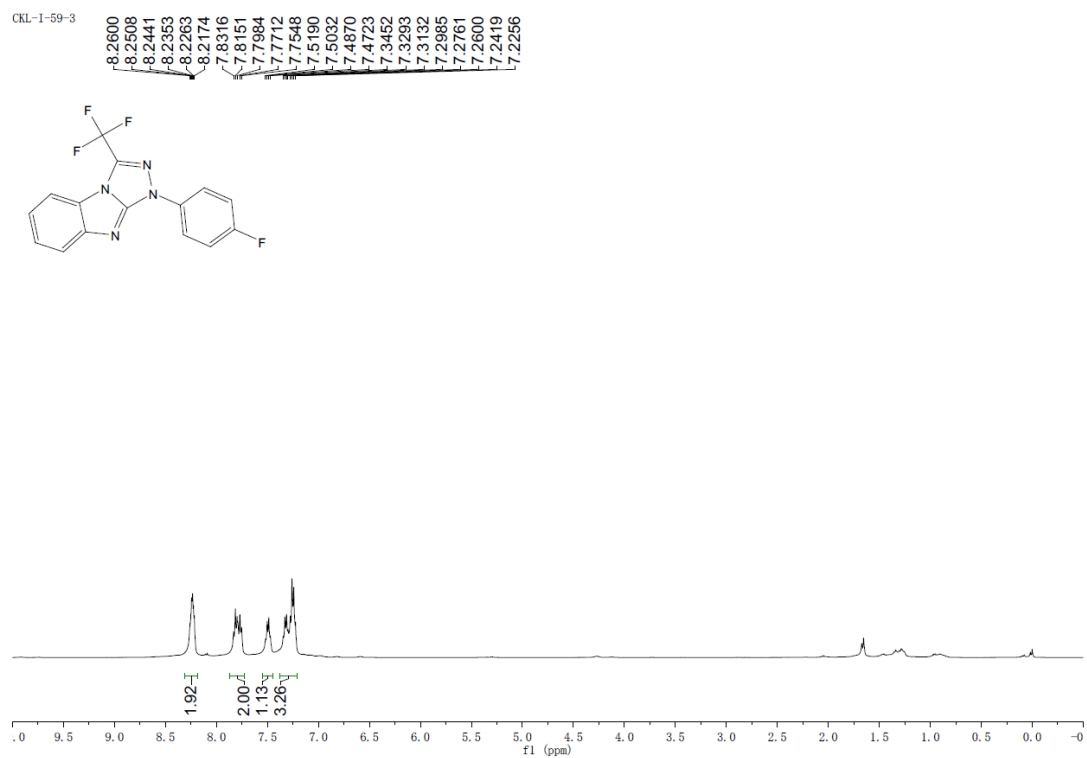

$^1\text{H}$  NMR (500 MHz,  $\text{CDCl}_3$ ) of **3h**.

CEL-1-59-3

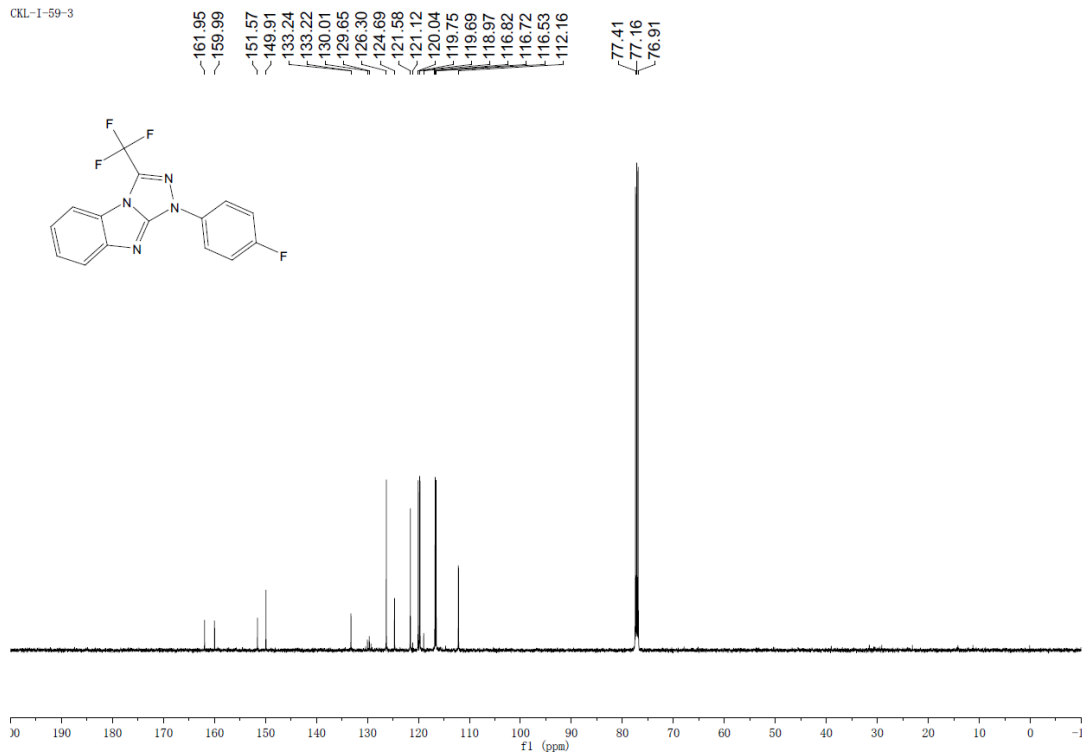

<sup>13</sup>C NMR (125 MHz, CDCl<sub>3</sub>) of 3h.

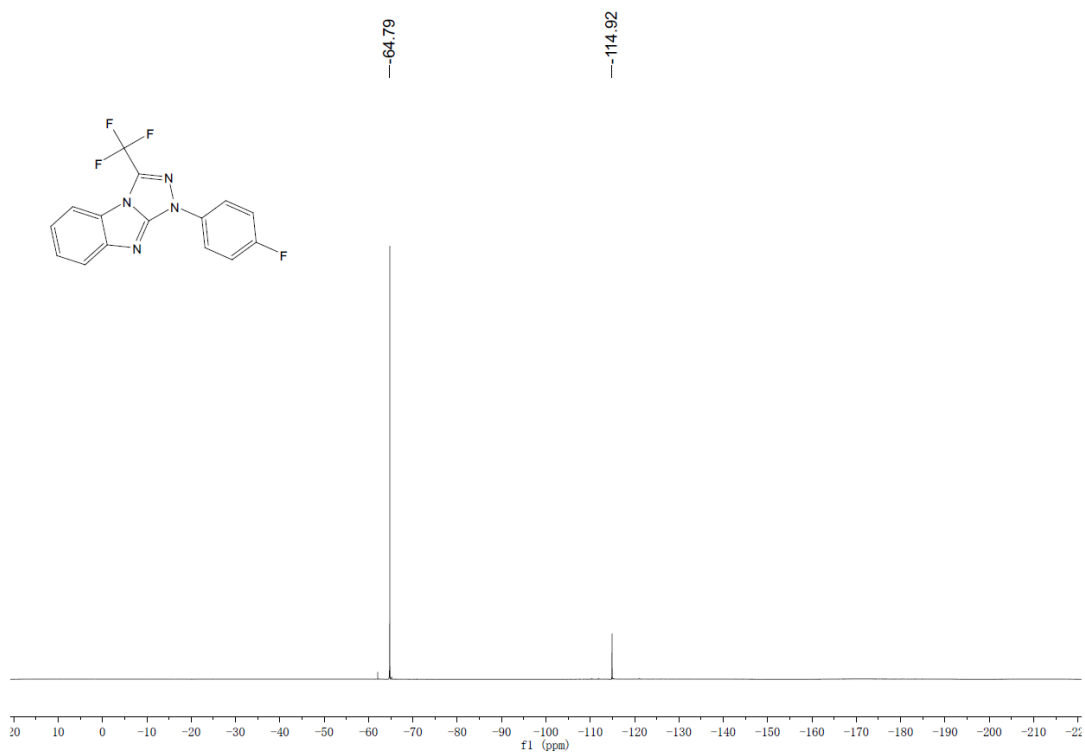

<sup>19</sup>F NMR (471 MHz, CDCl<sub>3</sub>) of 3h.

CKL-1-59-1-H

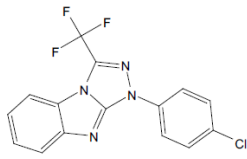

8.2253  
8.2080  
7.8223  
7.8059  
7.7705  
7.7545  
7.5210  
7.5039  
7.4932  
7.4770  
7.3368  
7.3215  
7.3060  
7.2596

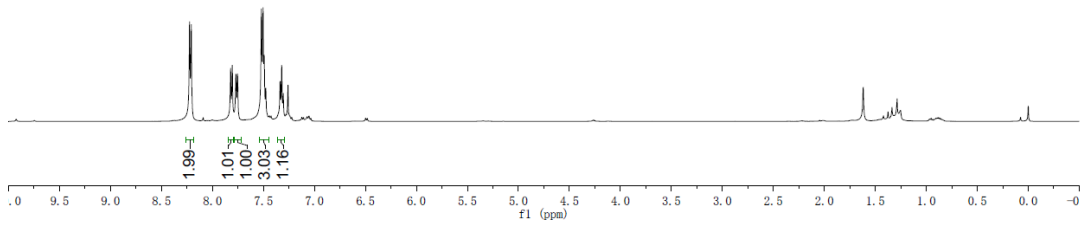

$^1\text{H}$  NMR (500 MHz,  $\text{CDCl}_3$ ) of **3i**.

CKL-1-59-1-H

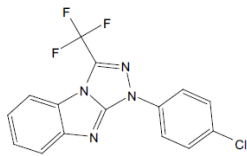

151.48  
149.86  
135.58  
132.09  
130.34  
130.22  
129.84  
129.62  
129.15  
129.15  
126.35  
124.65  
121.73  
120.10  
119.08  
118.93  
116.78  
112.15

77.41  
77.16  
76.91

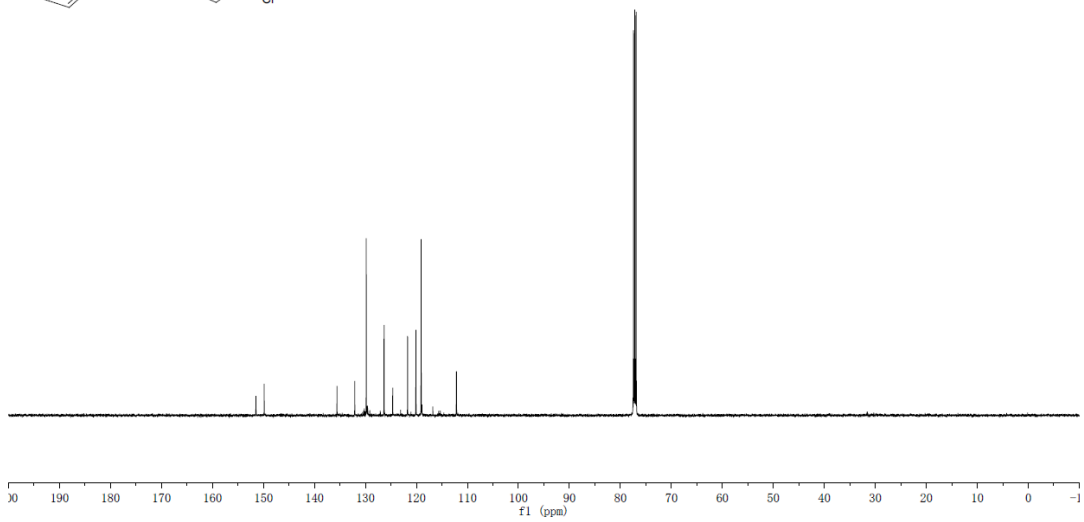

$^{13}\text{C}$  NMR (125 MHz,  $\text{CDCl}_3$ ) of **3i**.

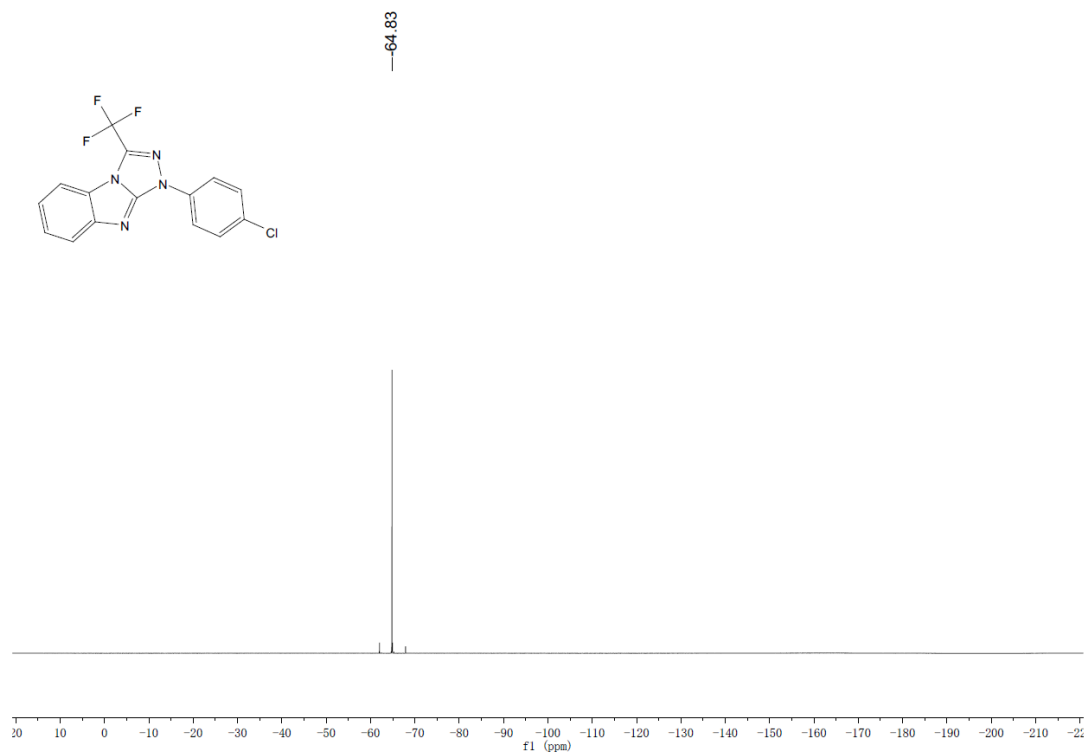

$^{19}\text{F}$  NMR (471 MHz,  $\text{CDCl}_3$ ) of **3i**.

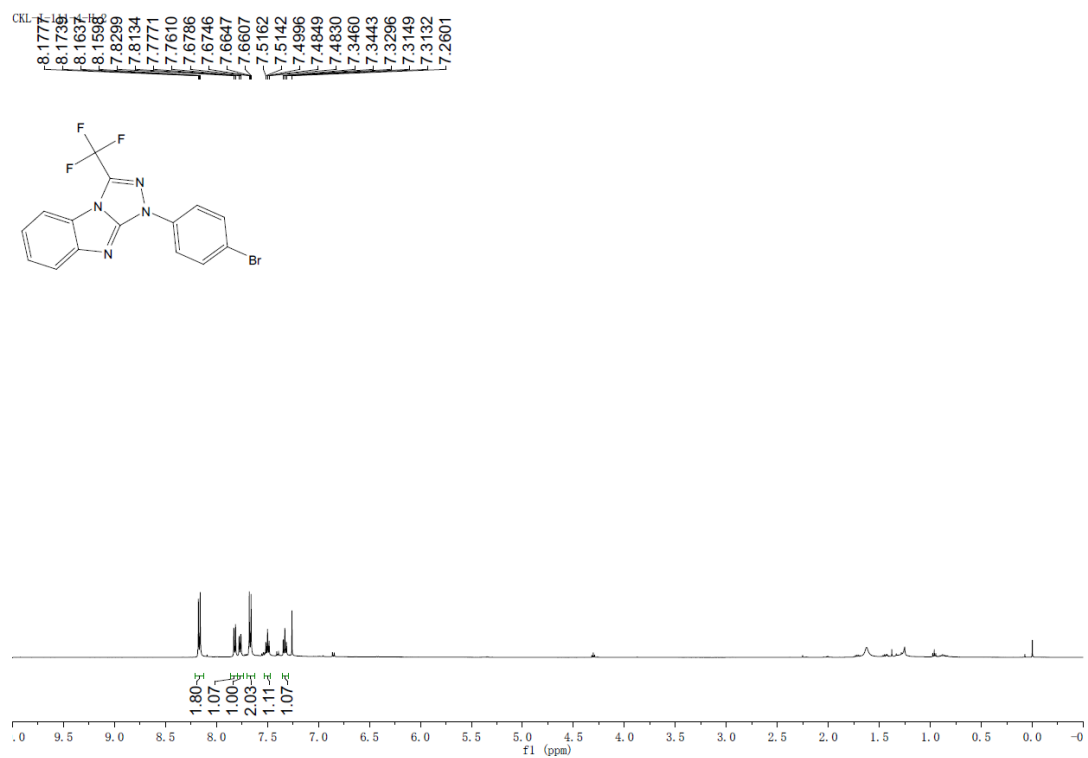

$^1\text{H}$  NMR (500 MHz,  $\text{CDCl}_3$ ) of **3j**.

CKL-1-111-4-H-4

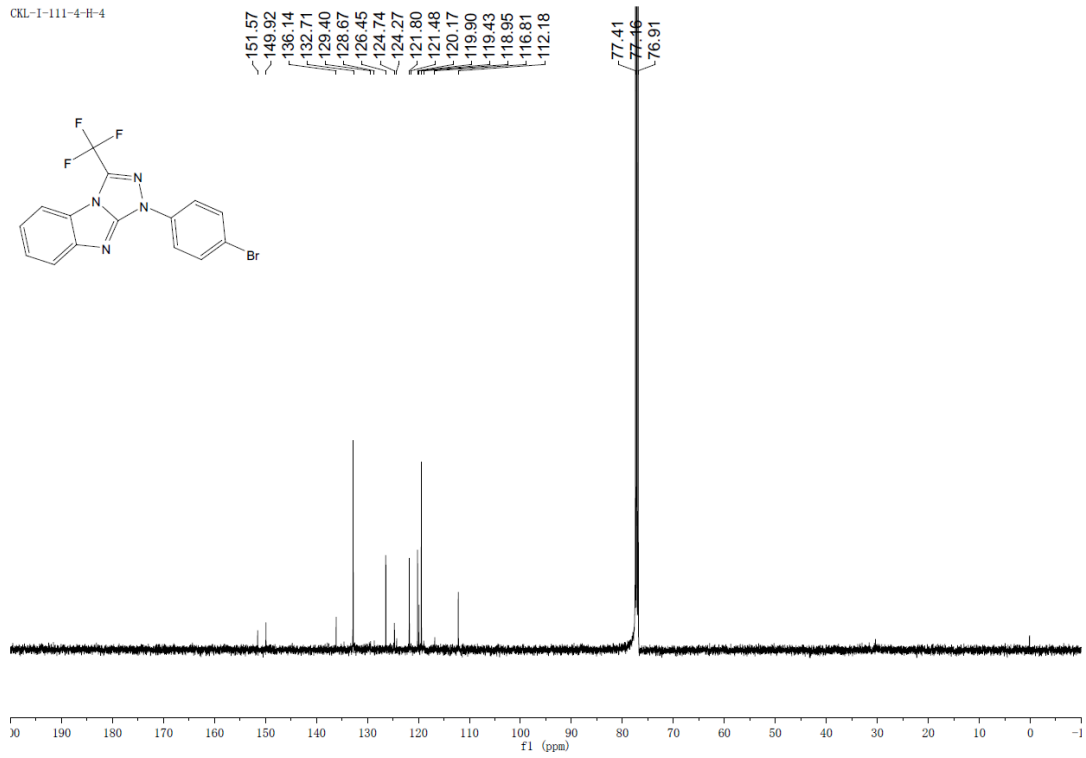

$^{13}\text{C}$  NMR (125 MHz,  $\text{CDCl}_3$ ) of **3j**.

CKL-1-111-4-H-3

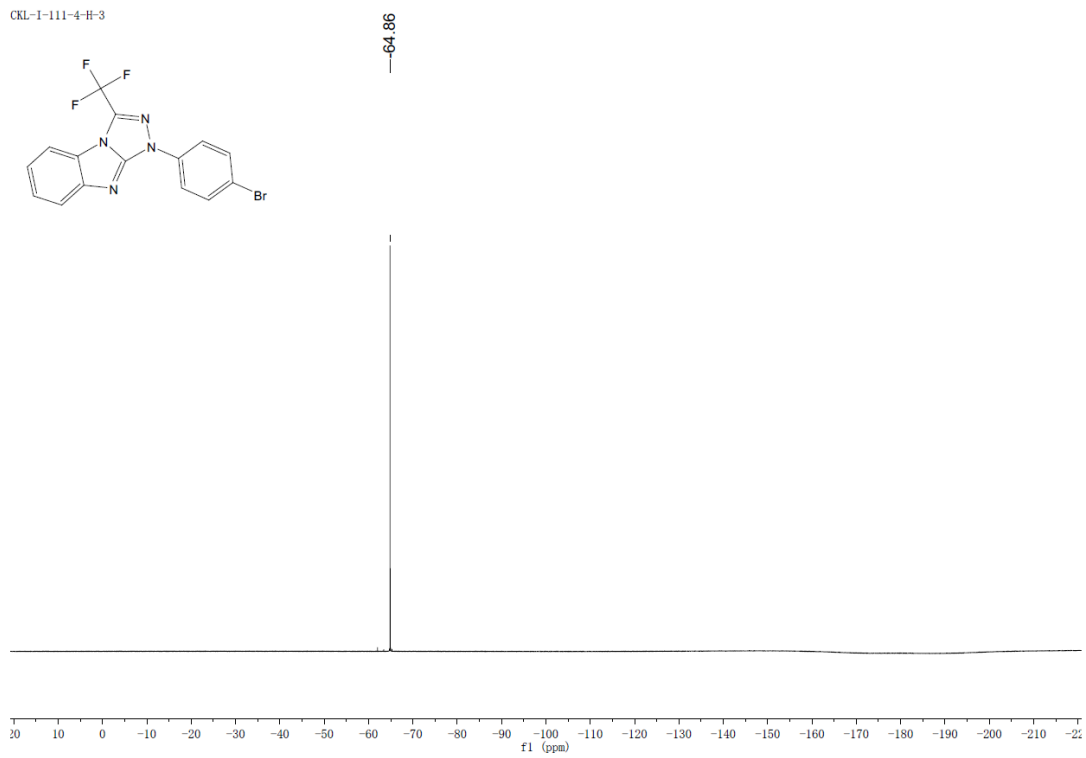

$^{19}\text{F}$  NMR (471 MHz,  $\text{CDCl}_3$ ) of **3j**.



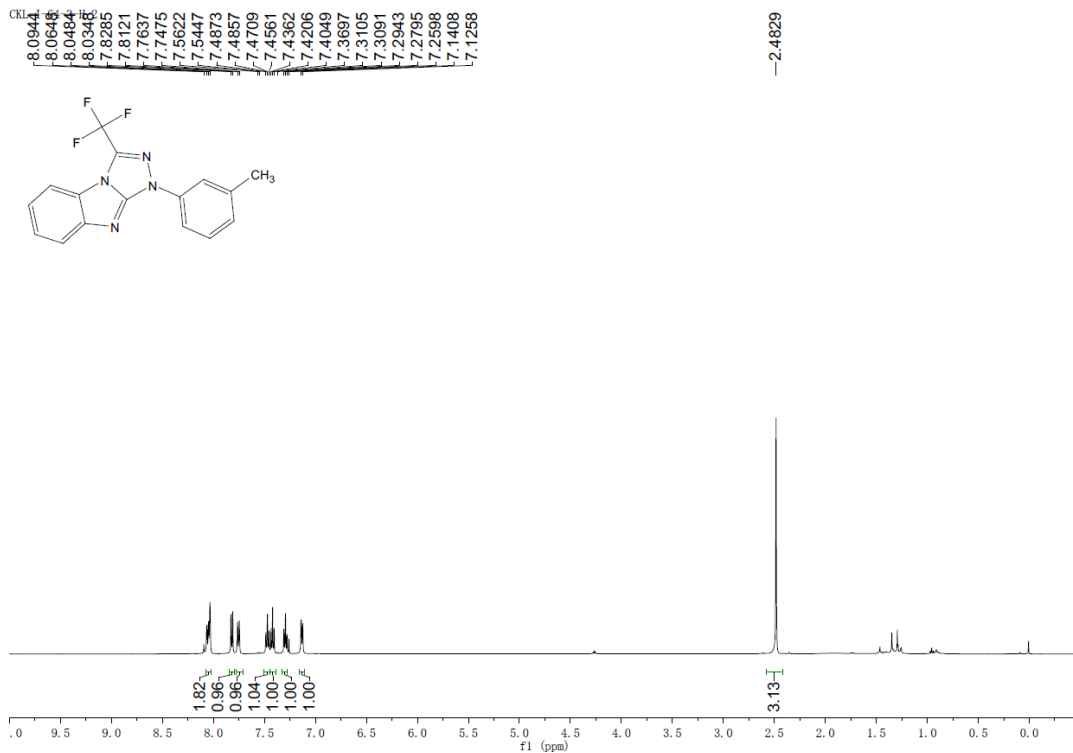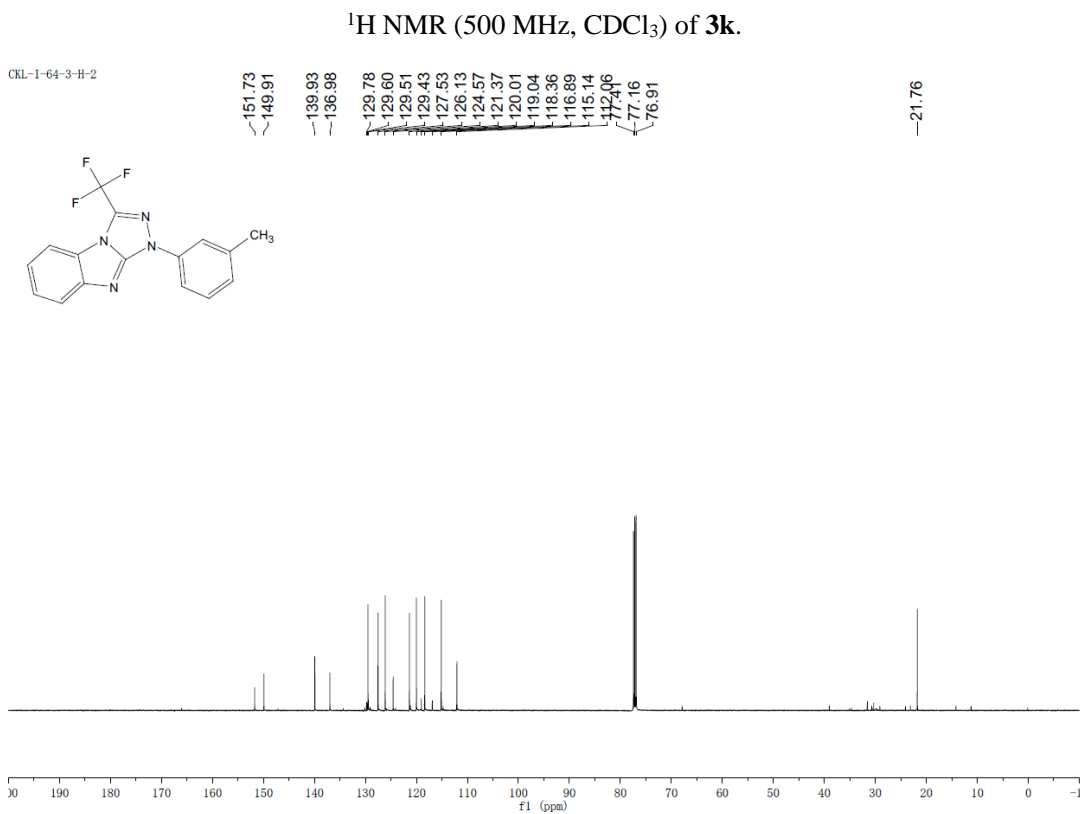

<sup>13</sup>C NMR (125 MHz, CDCl<sub>3</sub>) of **3k**.

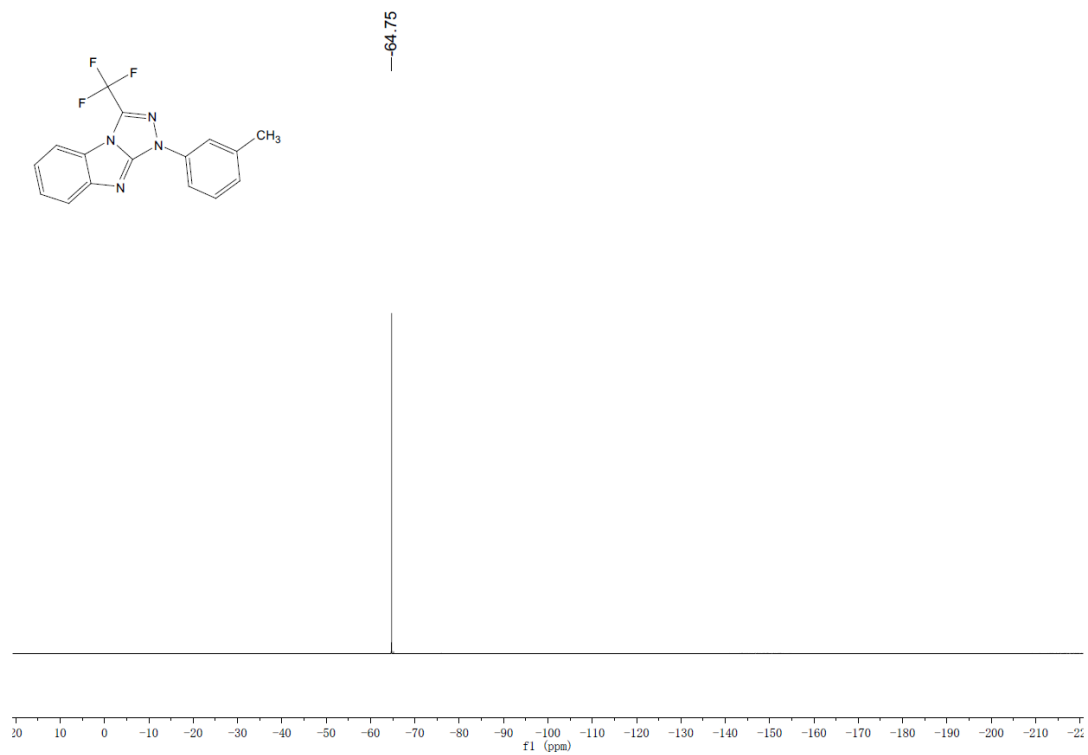

$^{19}\text{F}$  NMR (471 MHz,  $\text{CDCl}_3$ ) of **3k**.

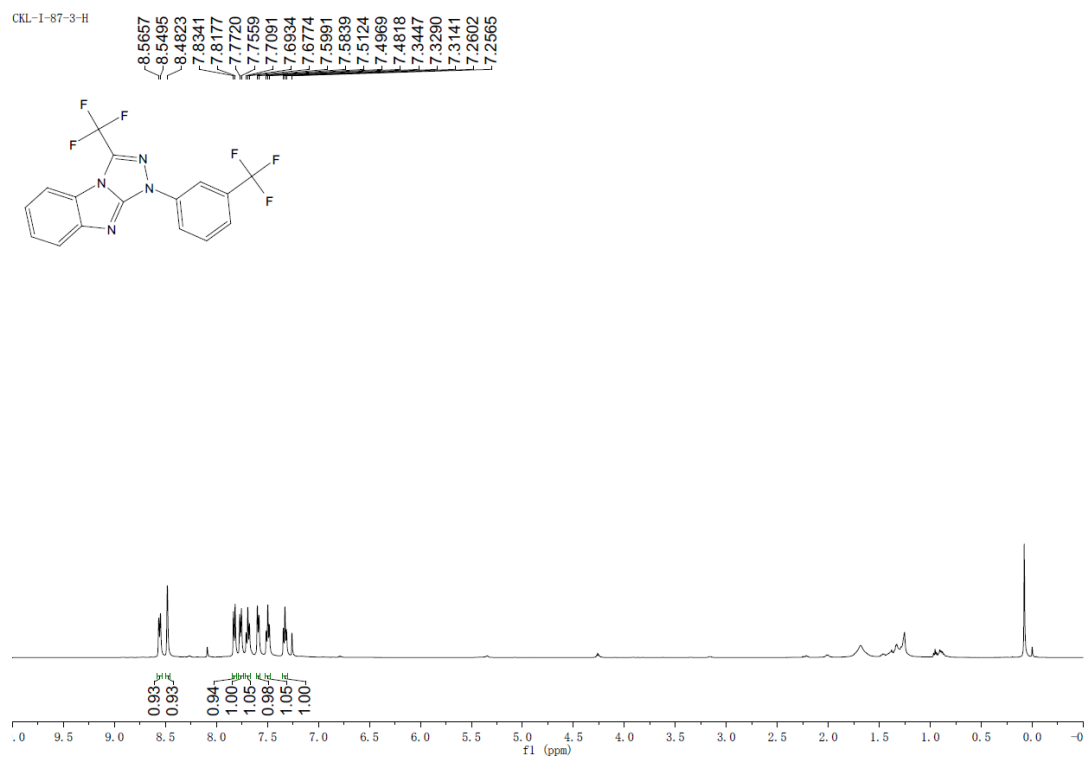

$^1\text{H}$  NMR (500 MHz,  $\text{CDCl}_3$ ) of **3l**.

CKL-1-87-3-H

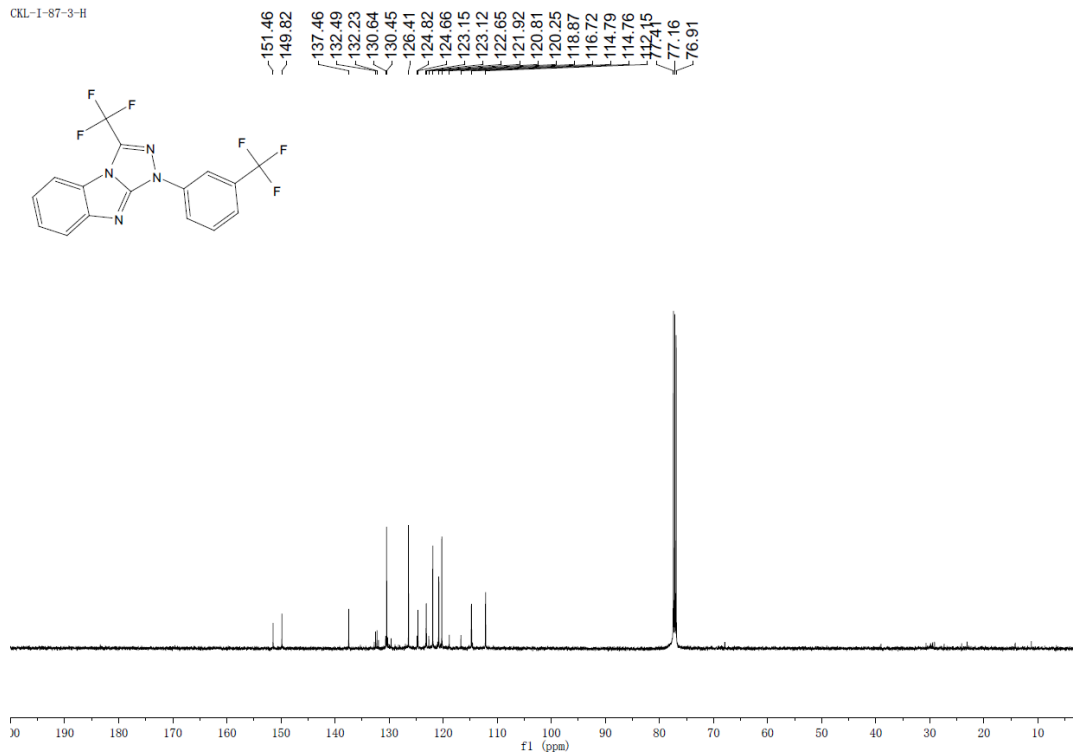

$^{13}\text{C}$  NMR (125 MHz,  $\text{CDCl}_3$ ) of **31**.

CKL-1-87-3-H

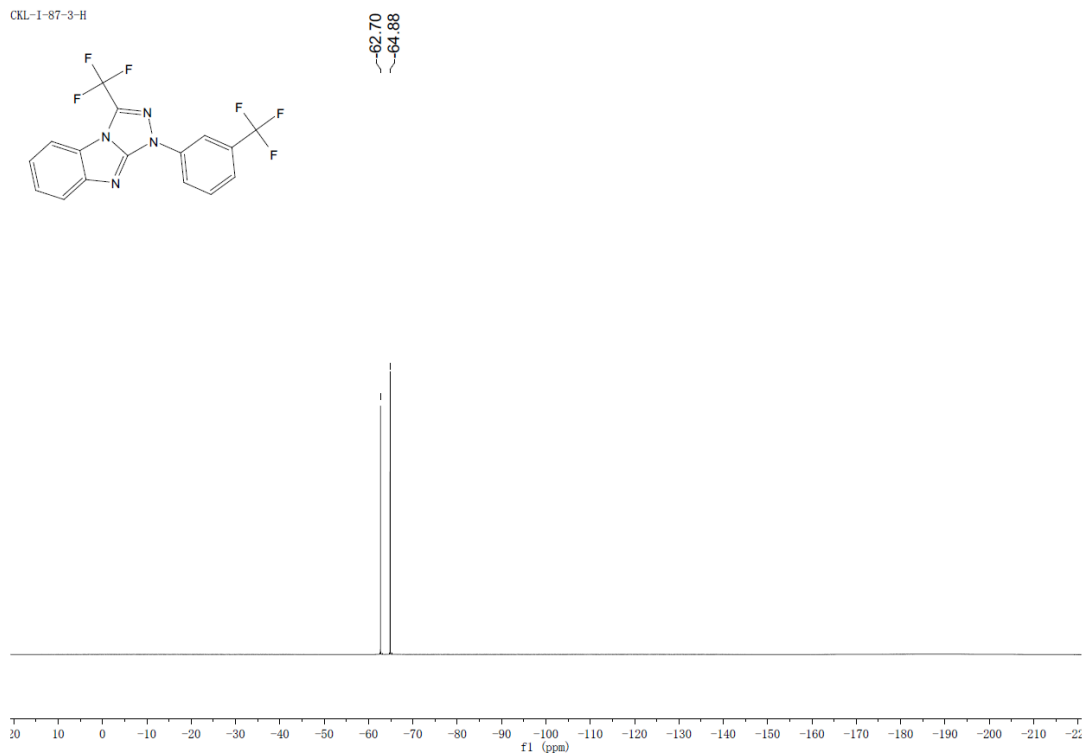

$^{19}\text{F}$  NMR (471 MHz,  $\text{CDCl}_3$ ) of **31**.

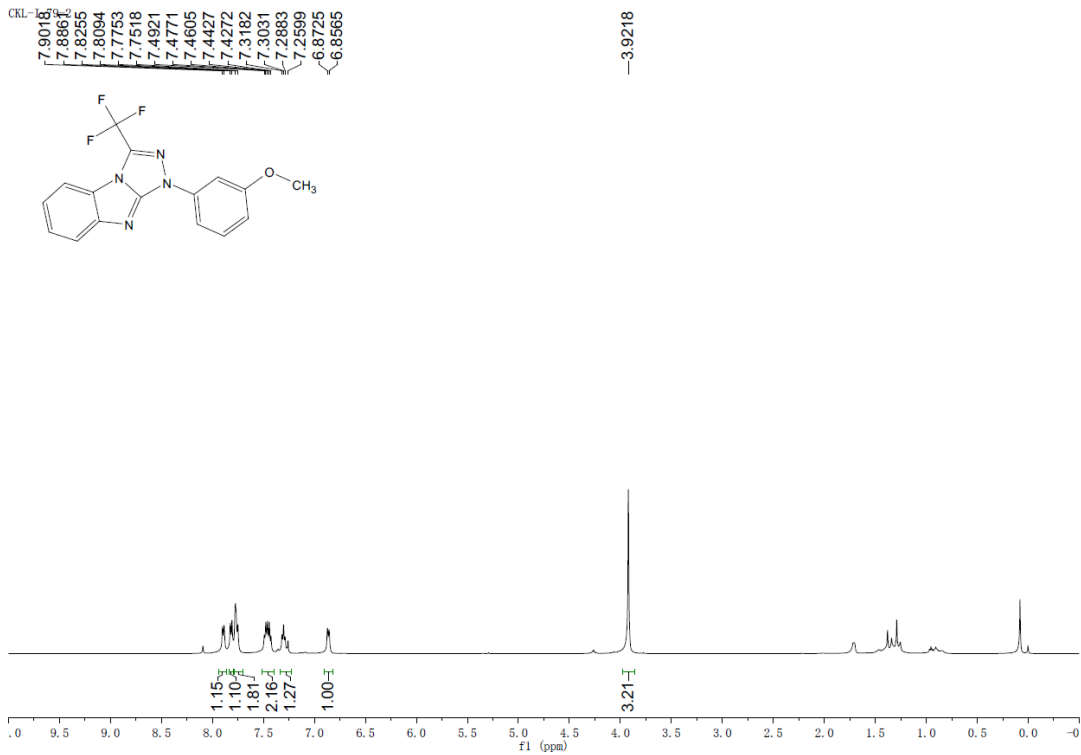

<sup>1</sup>H NMR (500 MHz, CDCl<sub>3</sub>) of **3m**.

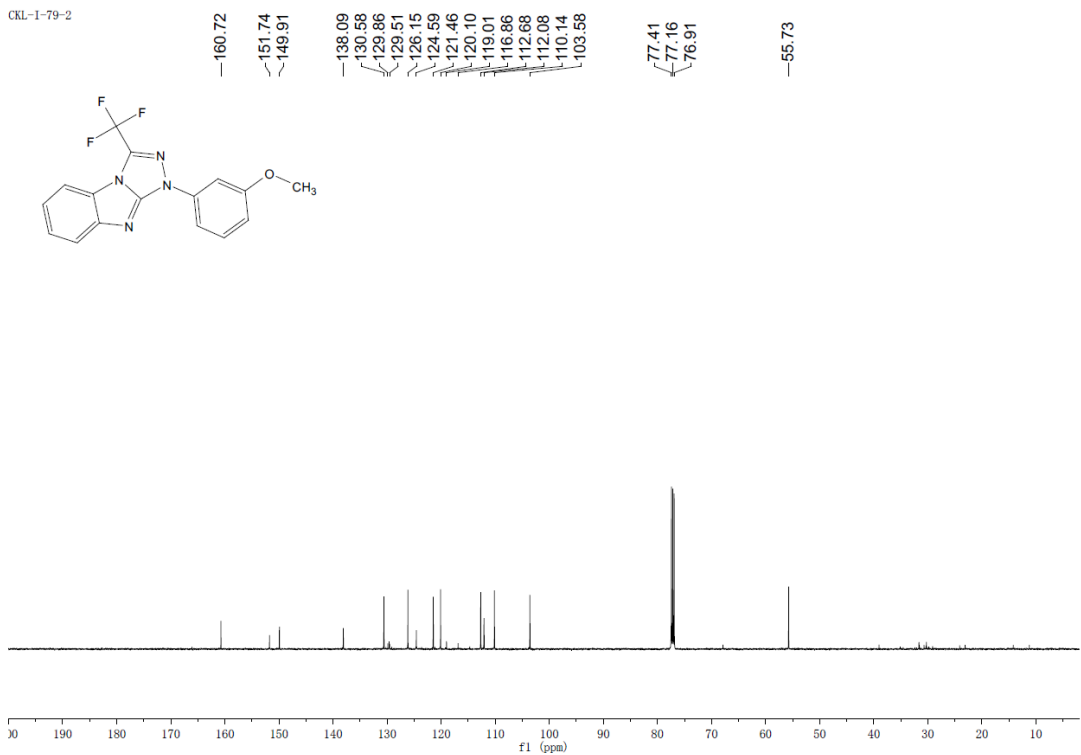

<sup>13</sup>C NMR (125 MHz, CDCl<sub>3</sub>) of **3m**.

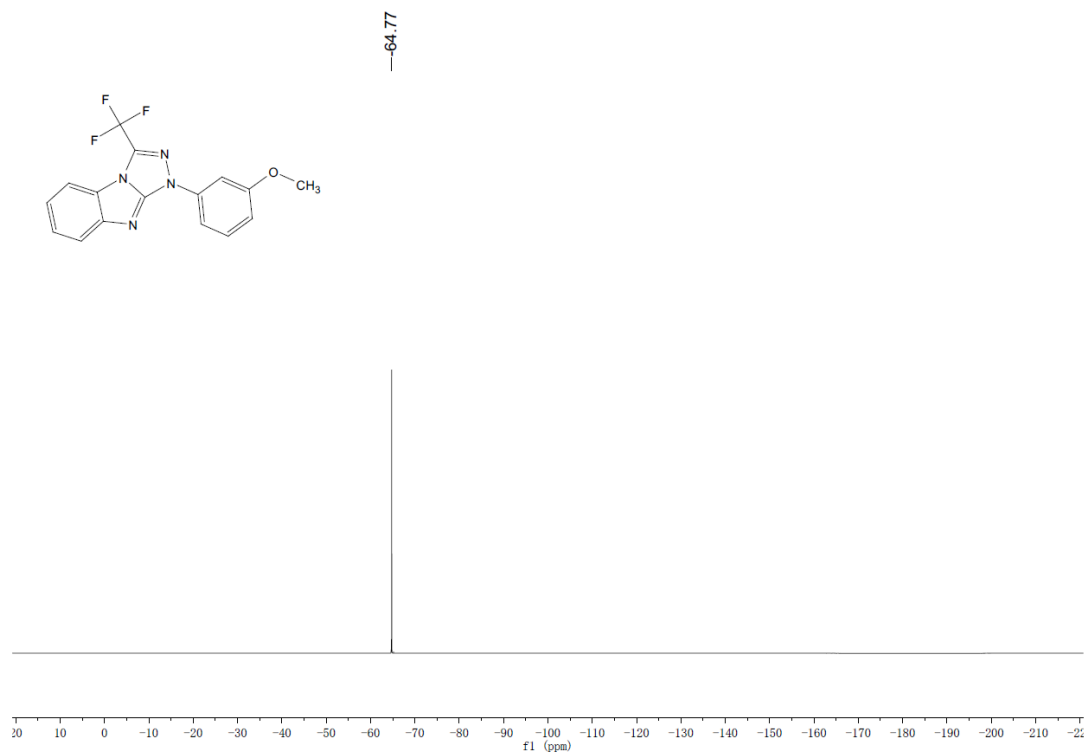

$^{19}\text{F}$  NMR (471 MHz,  $\text{CDCl}_3$ ) of **3m**.

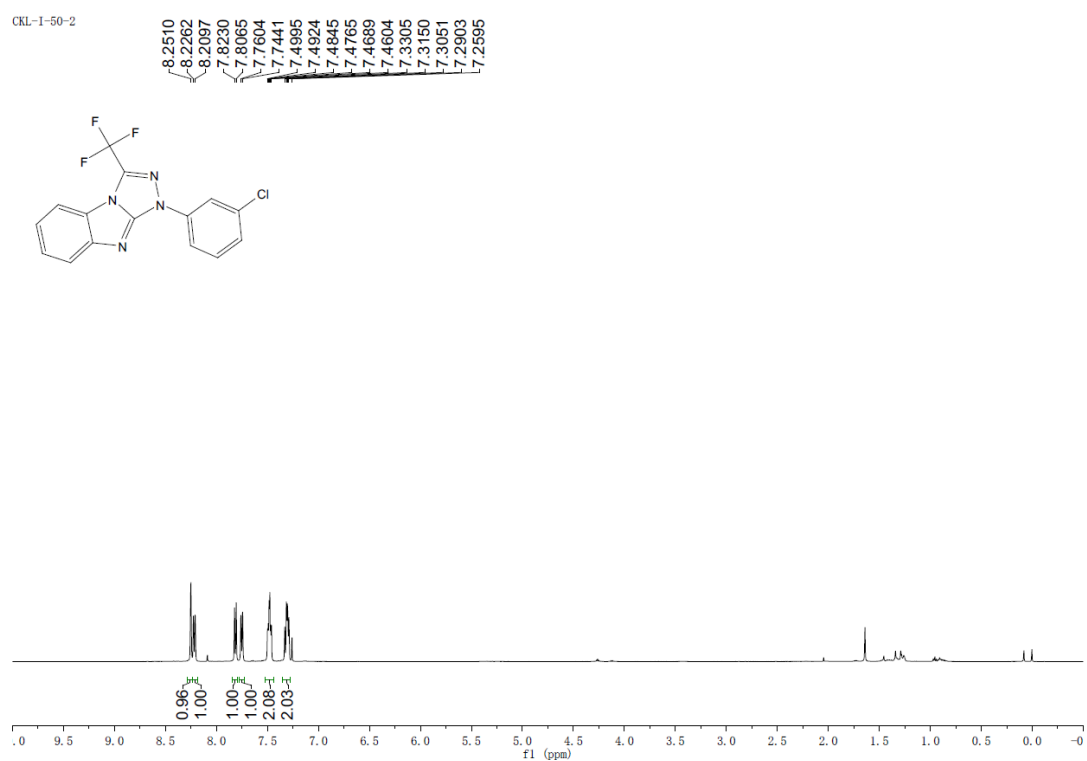

$^1\text{H}$  NMR (500 MHz,  $\text{CDCl}_3$ ) of **3n**.

CRL-1-50-2

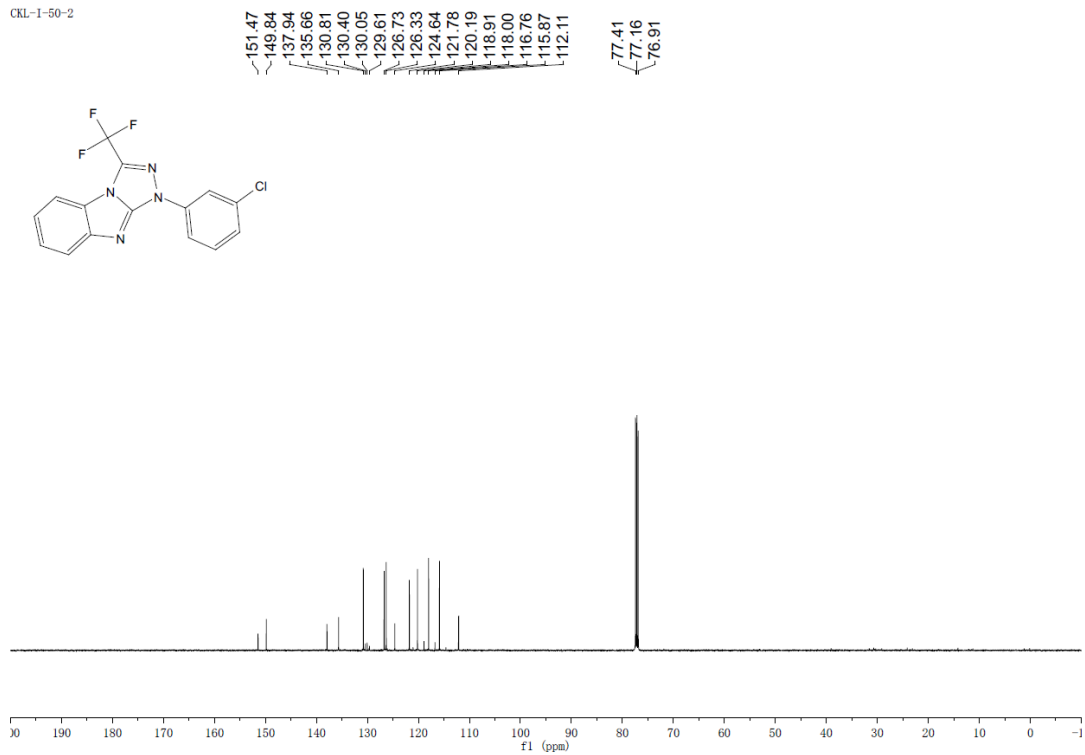

<sup>13</sup>C NMR (125 MHz, CDCl<sub>3</sub>) of 3n.

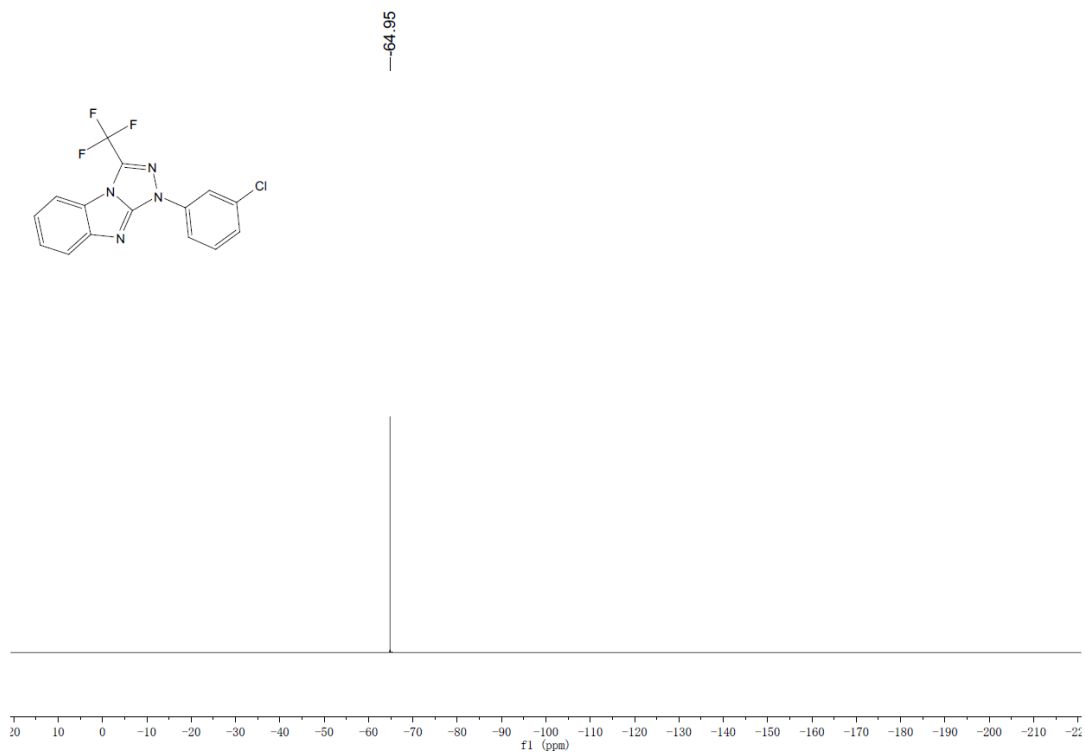

<sup>19</sup>F NMR (471 MHz, CDCl<sub>3</sub>) of 3n.

CEL-1-79-3-H-2

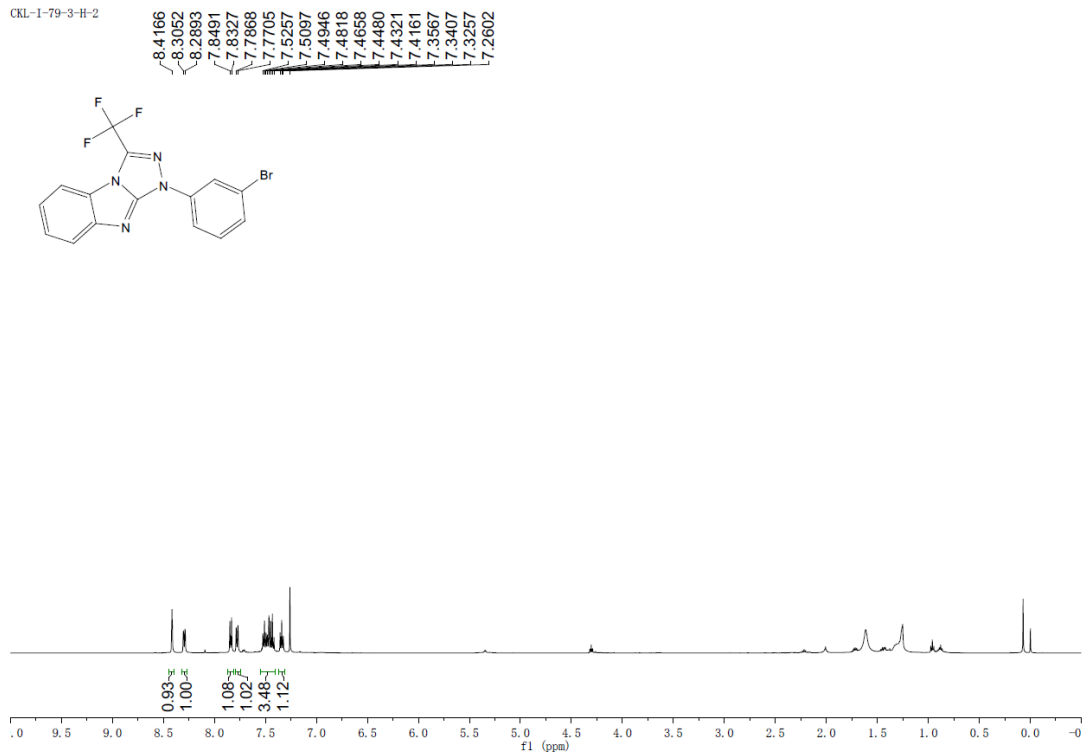

$^1\text{H}$  NMR (500 MHz,  $\text{CDCl}_3$ ) of **3o**.

CEL-1-79-3-H

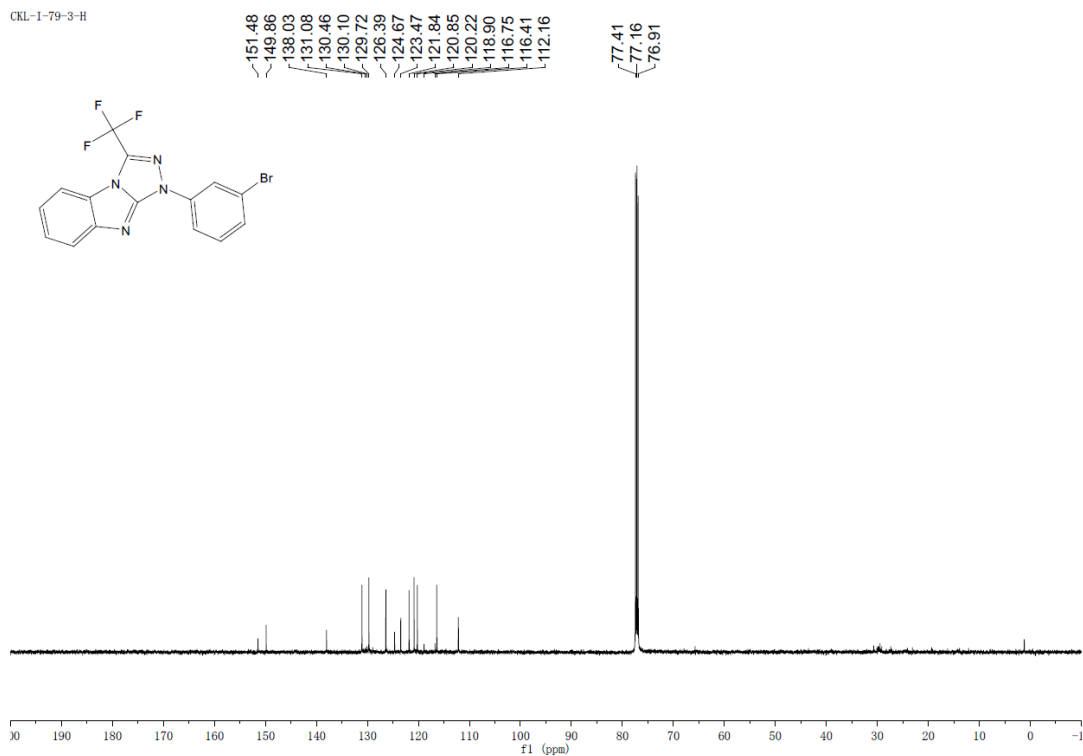

$^{13}\text{C}$  NMR (125 MHz,  $\text{CDCl}_3$ ) of **3o**.

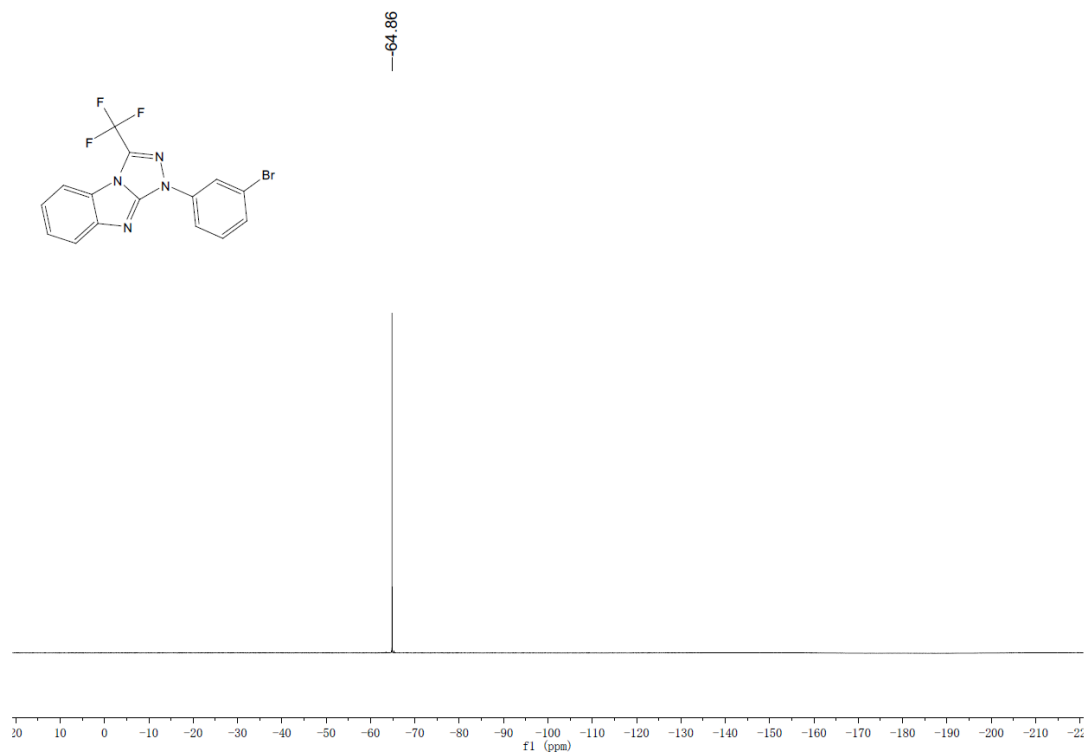

$^{19}\text{F}$  NMR (471 MHz,  $\text{CDCl}_3$ ) of **3o**.

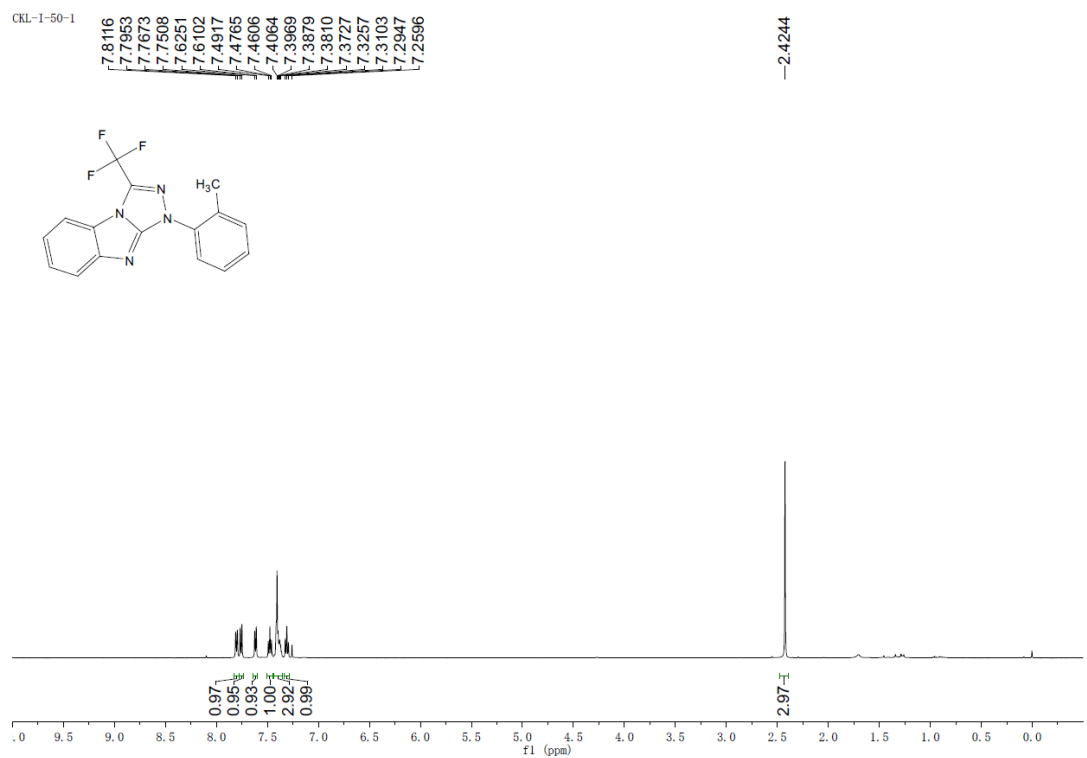

$^1\text{H}$  NMR (500 MHz,  $\text{CDCl}_3$ ) of **3p**.



CKL-1-50-1

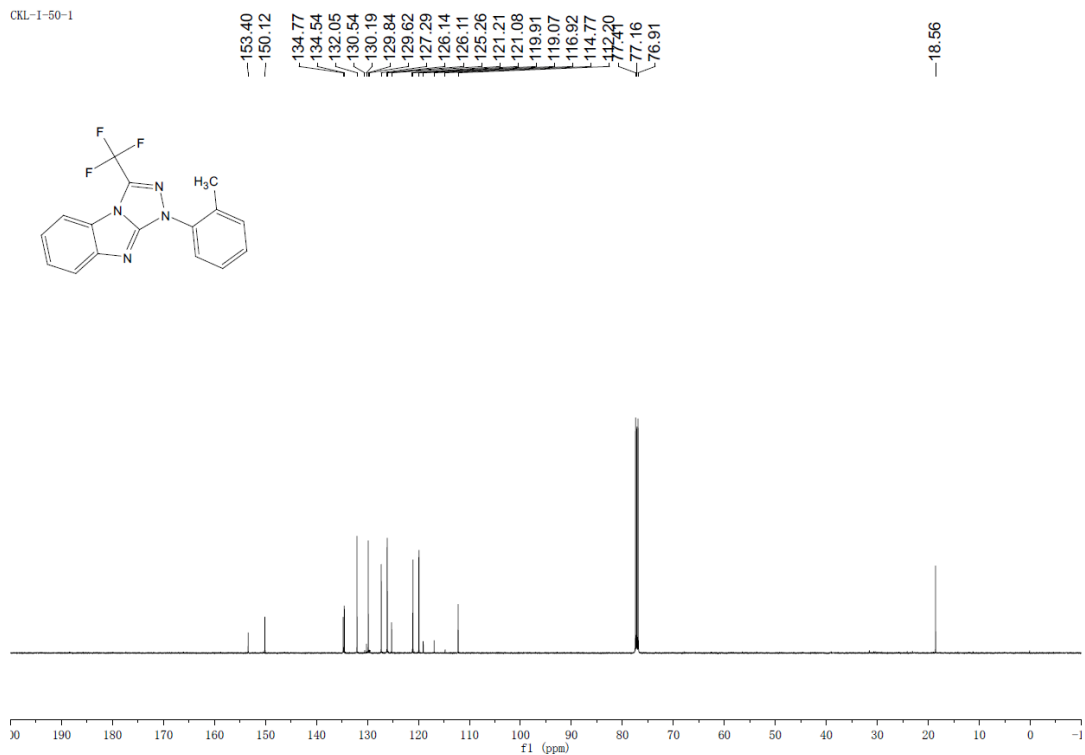

<sup>13</sup>C NMR (125 MHz, CDCl<sub>3</sub>) of 3p.

CKL-1-50-1

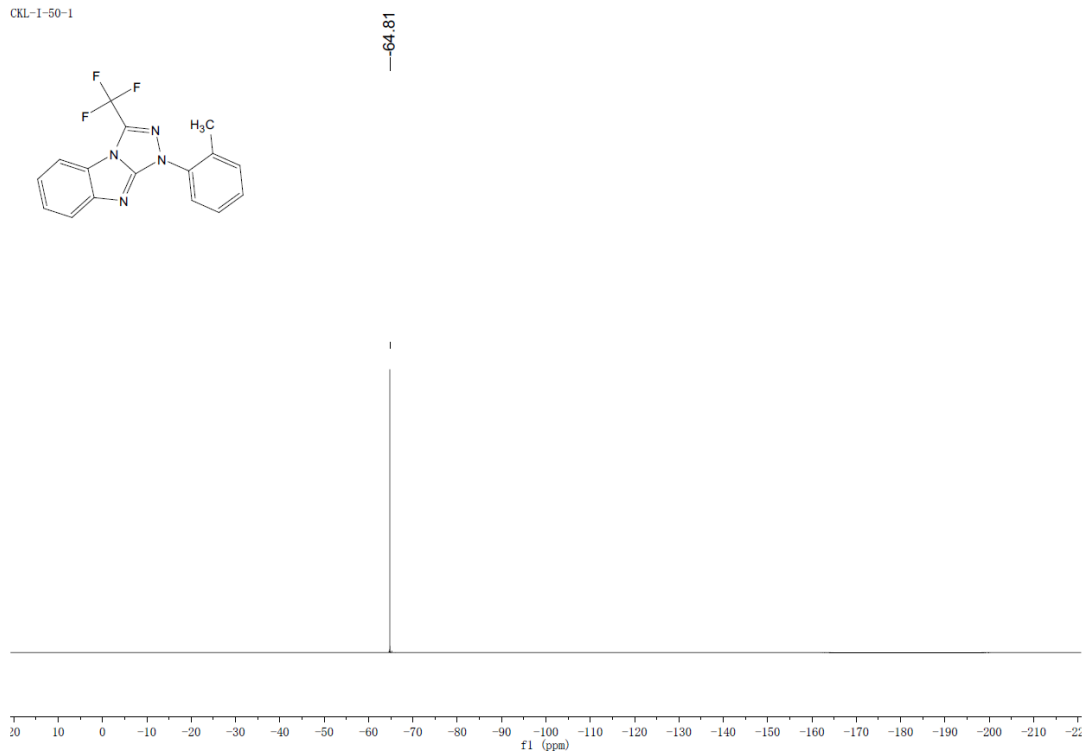

<sup>19</sup>F NMR (471 MHz, CDCl<sub>3</sub>) of 3p.

CKL-1-141  
7.80541  
7.78914  
7.7706  
7.7542  
7.7126  
7.7094  
7.7064  
7.6989  
7.6943  
7.6355  
7.6317  
7.6202  
7.6170  
7.5056  
7.4908  
7.4889  
7.4787  
7.4642  
7.4619  
7.3361  
7.3203  
7.3051  
7.2599

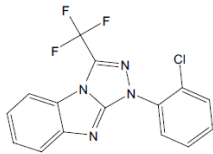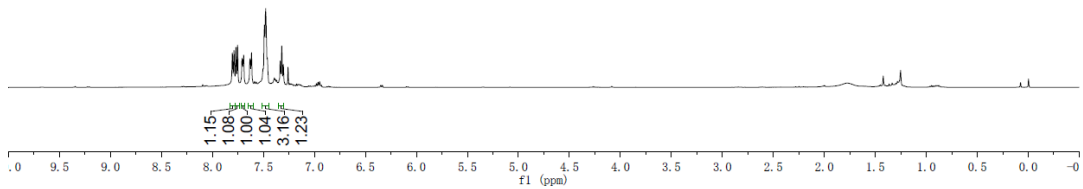

<sup>1</sup>H NMR (500 MHz, CDCl<sub>3</sub>) of **3q**.

CKL-1-177-2

153.24  
149.99  
133.31  
131.44  
131.33  
130.48  
130.13  
128.61  
128.15  
126.18  
125.36  
121.35  
120.02  
118.92  
116.77  
112.20

77.41  
77.16  
76.91

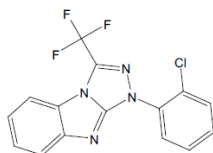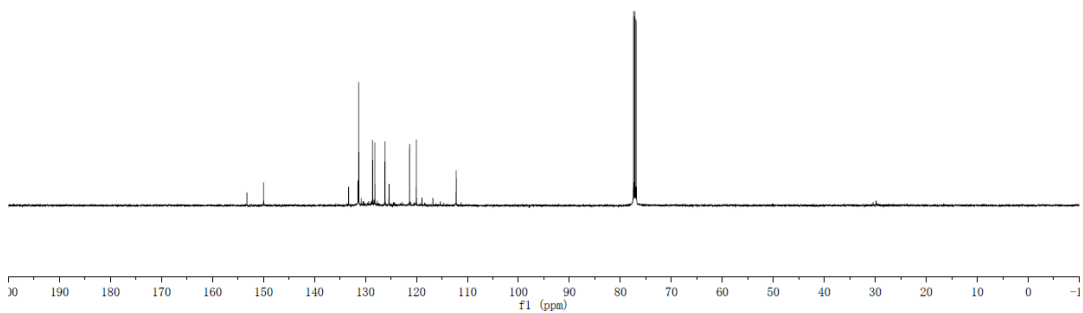

<sup>13</sup>C NMR (125 MHz, CDCl<sub>3</sub>) of **3q**.

CRL-1-177-2

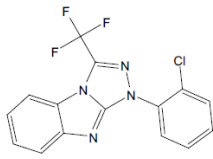

-64.94

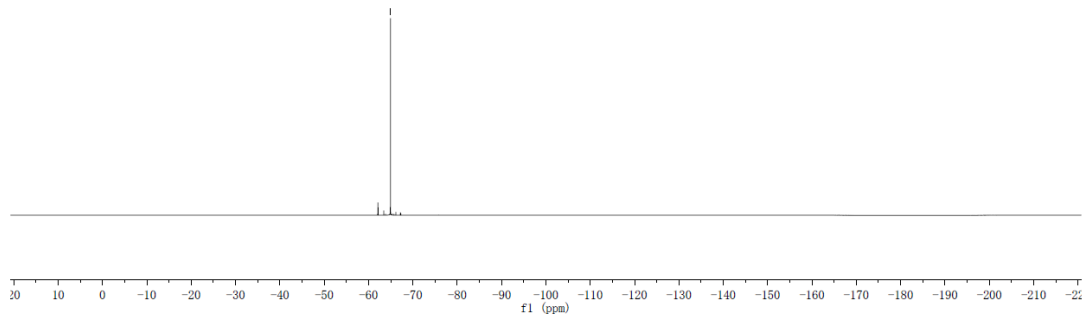

$^{19}\text{F}$  NMR (471 MHz,  $\text{CDCl}_3$ ) of **3q**.

8.2411  
8.2369  
8.1225  
8.1182  
8.1059  
8.1016  
8.0944  
7.8413  
7.8248  
7.7796  
7.7633  
7.6757  
7.6581  
7.5151  
7.4991  
7.4840  
7.4668  
7.4063  
7.3897  
7.3417  
7.3258  
7.3108  
7.2604  
7.2275  
7.1628

-2.4309

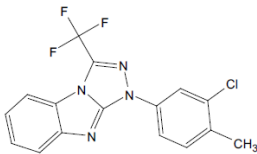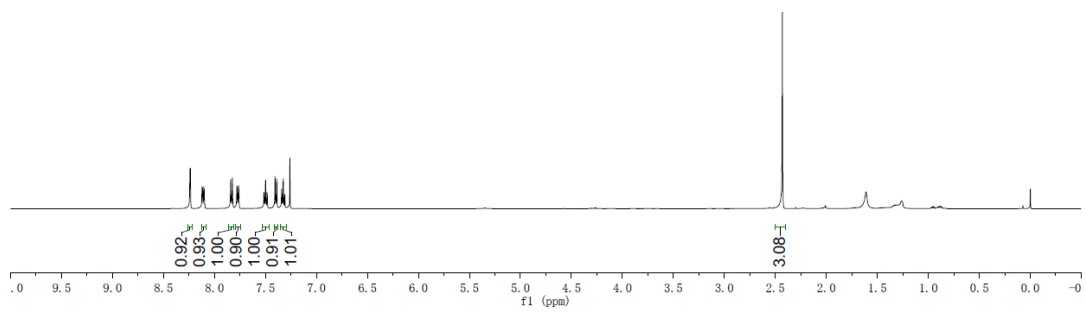

$^1\text{H}$  NMR (500 MHz,  $\text{CDCl}_3$ ) of **3r**.

CEL-1-64-2-H-2

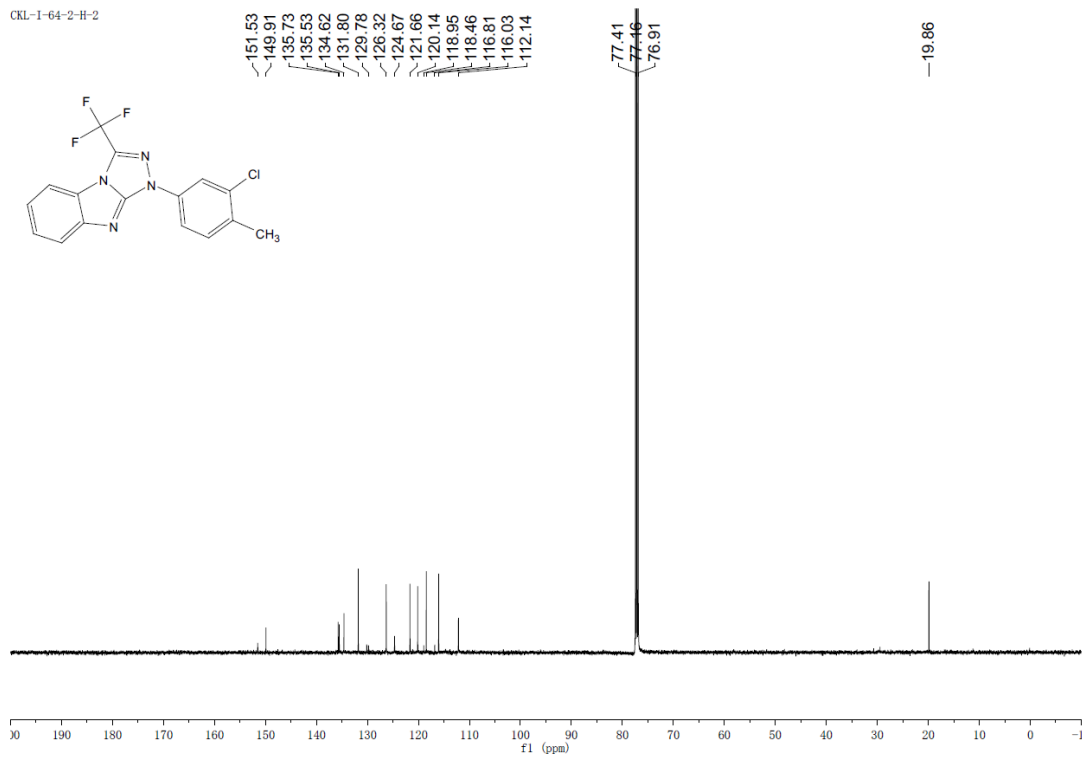

<sup>13</sup>C NMR (125 MHz, CDCl<sub>3</sub>) of 3r.

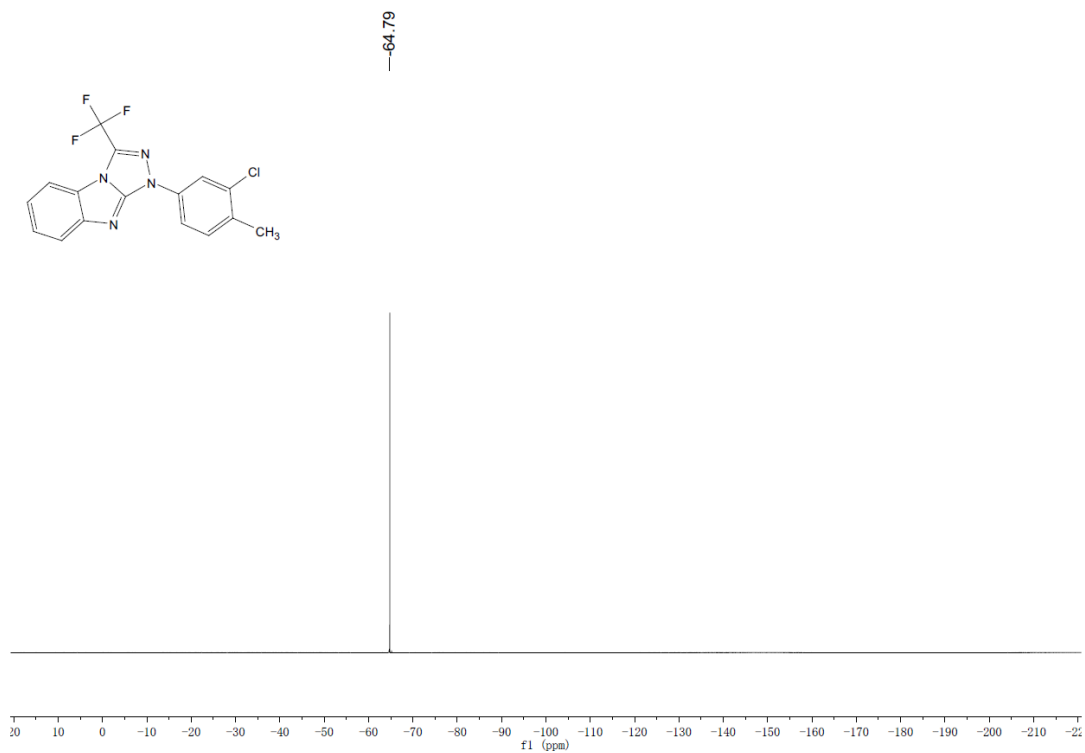

<sup>19</sup>F NMR (471 MHz, CDCl<sub>3</sub>) of 3r.

CEL-1-81-1-H  
7.7968  
7.7805  
7.7658  
7.7493  
7.6668  
7.6496  
7.6467  
7.6421  
7.4979  
7.4831  
7.4679  
7.4635  
7.4508  
7.4463  
7.3427  
7.3279  
7.3130  
7.3116  
7.2597

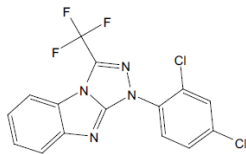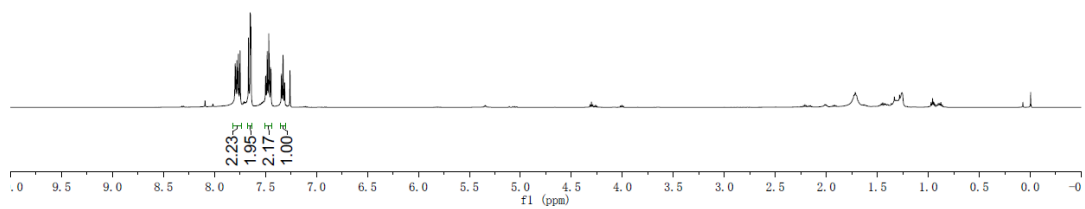

$^1\text{H}$  NMR (500 MHz,  $\text{CDCl}_3$ ) of **3s**.

CEL-1-81-1-H

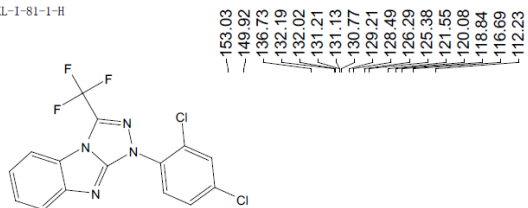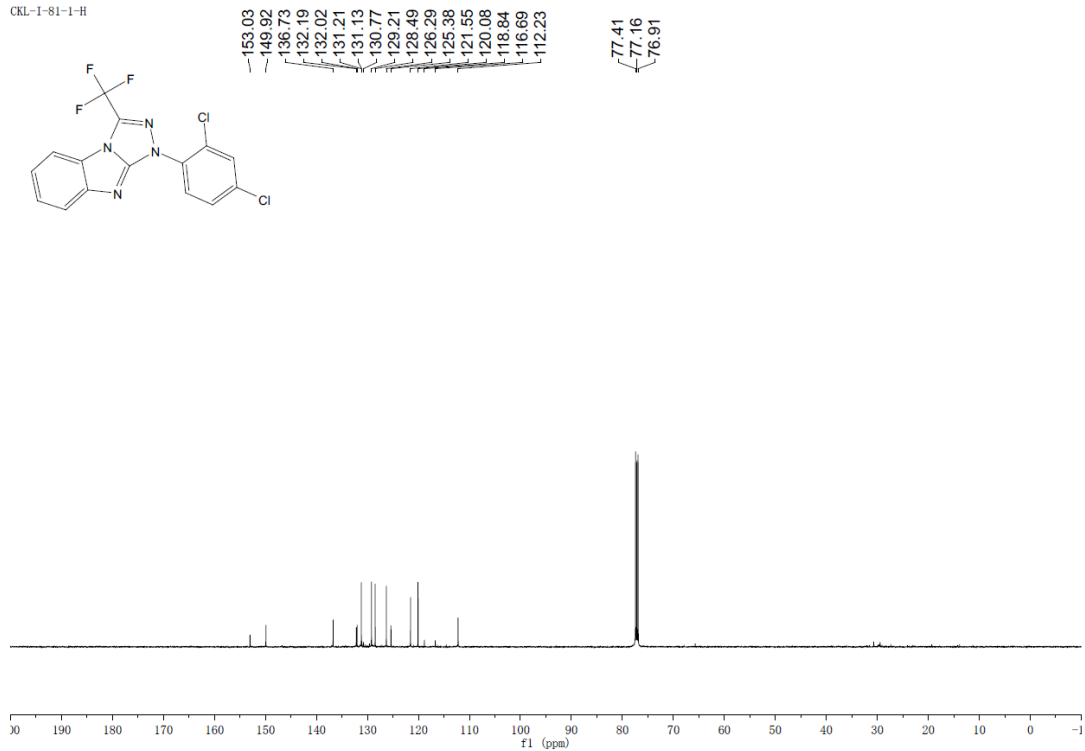

$^{13}\text{C}$  NMR (125 MHz,  $\text{CDCl}_3$ ) of **3s**.

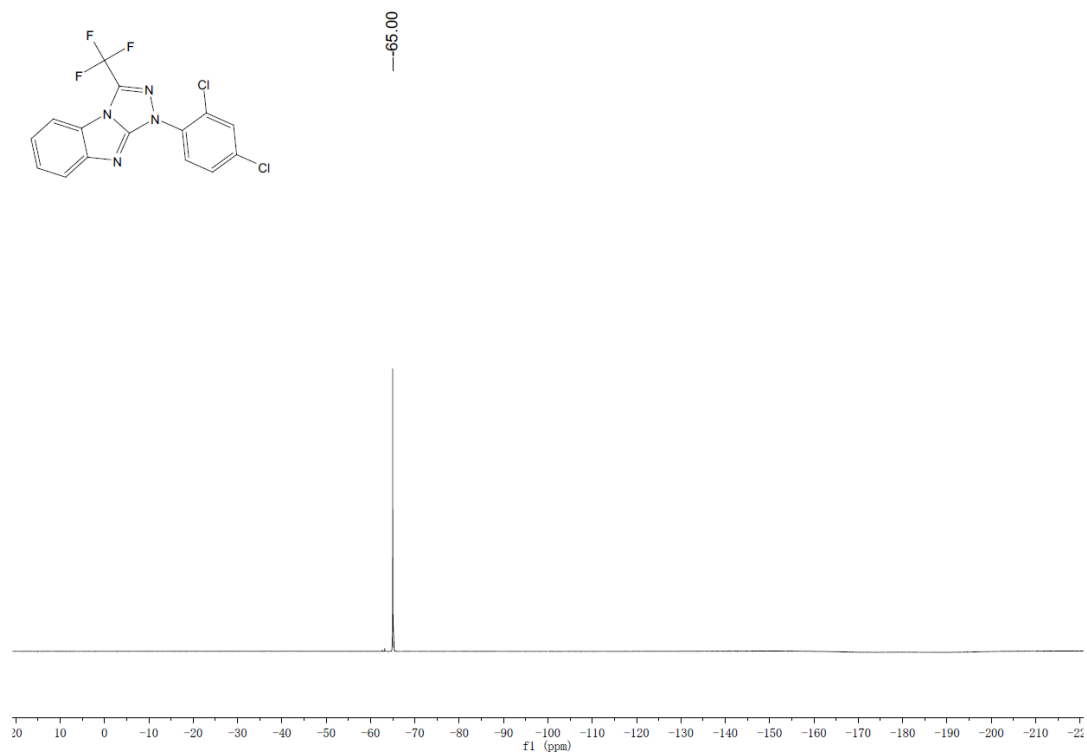

$^{19}\text{F}$  NMR (471 MHz,  $\text{CDCl}_3$ ) of **3s**.

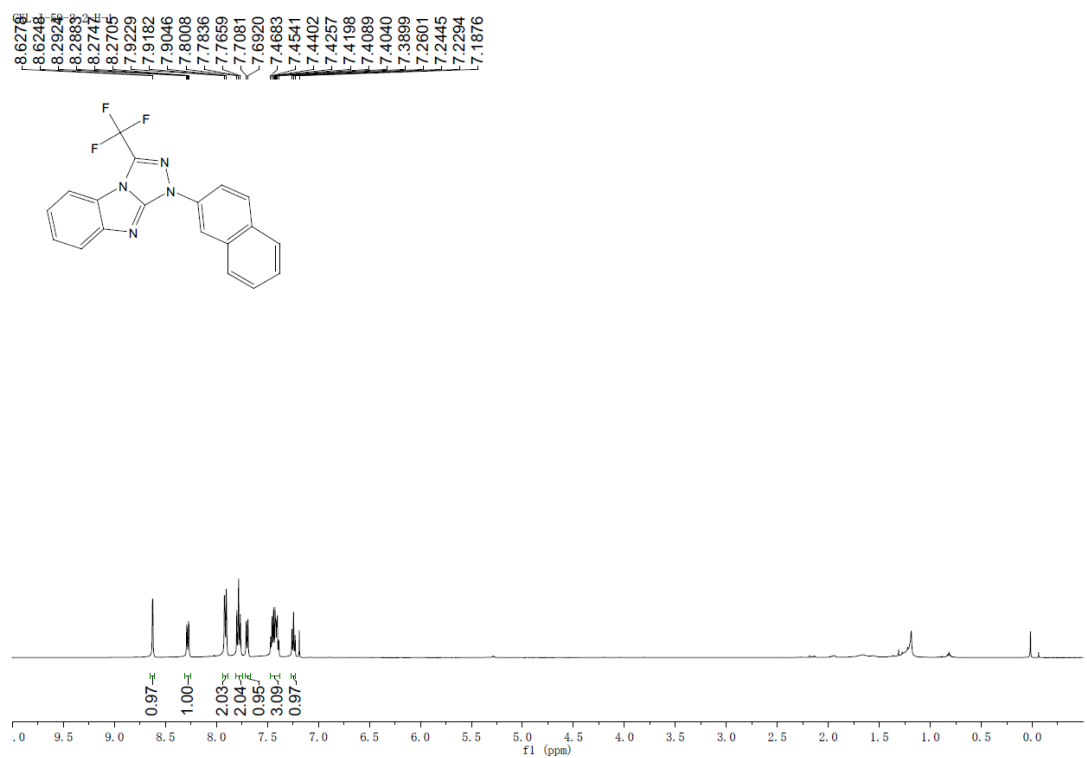

$^1\text{H}$  NMR (500 MHz,  $\text{CDCl}_3$ ) of **3t**.

CRL-1-59-2-2-H-1

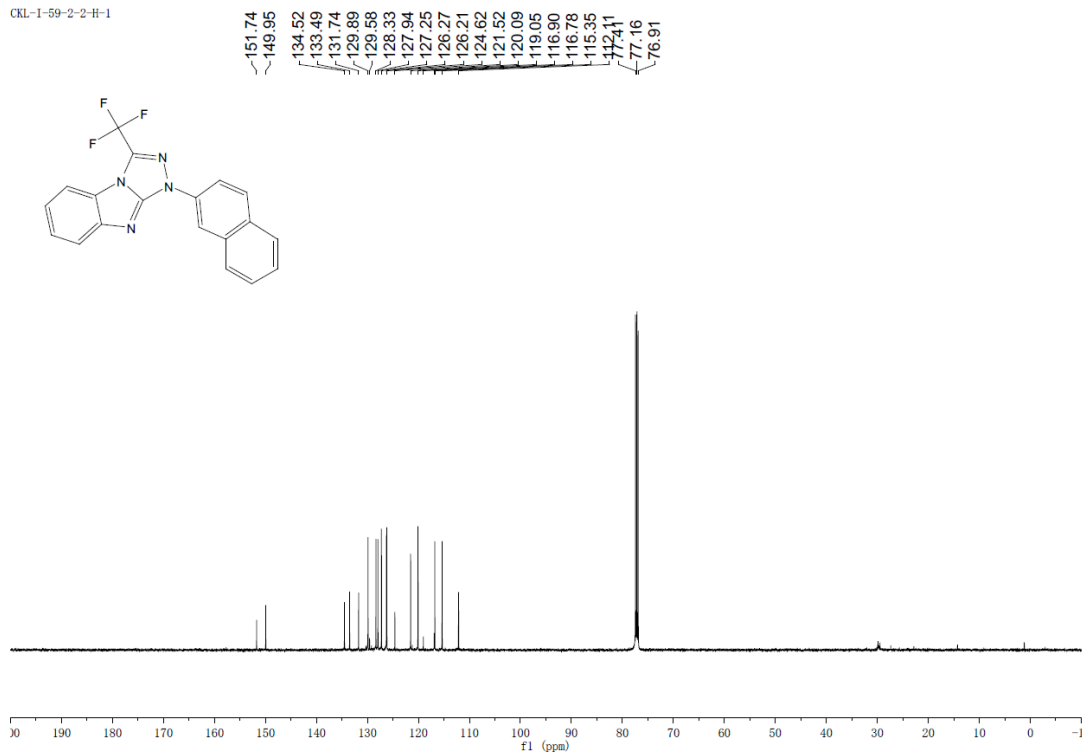

$^{13}\text{C}$  NMR (125 MHz,  $\text{CDCl}_3$ ) of **3t**.

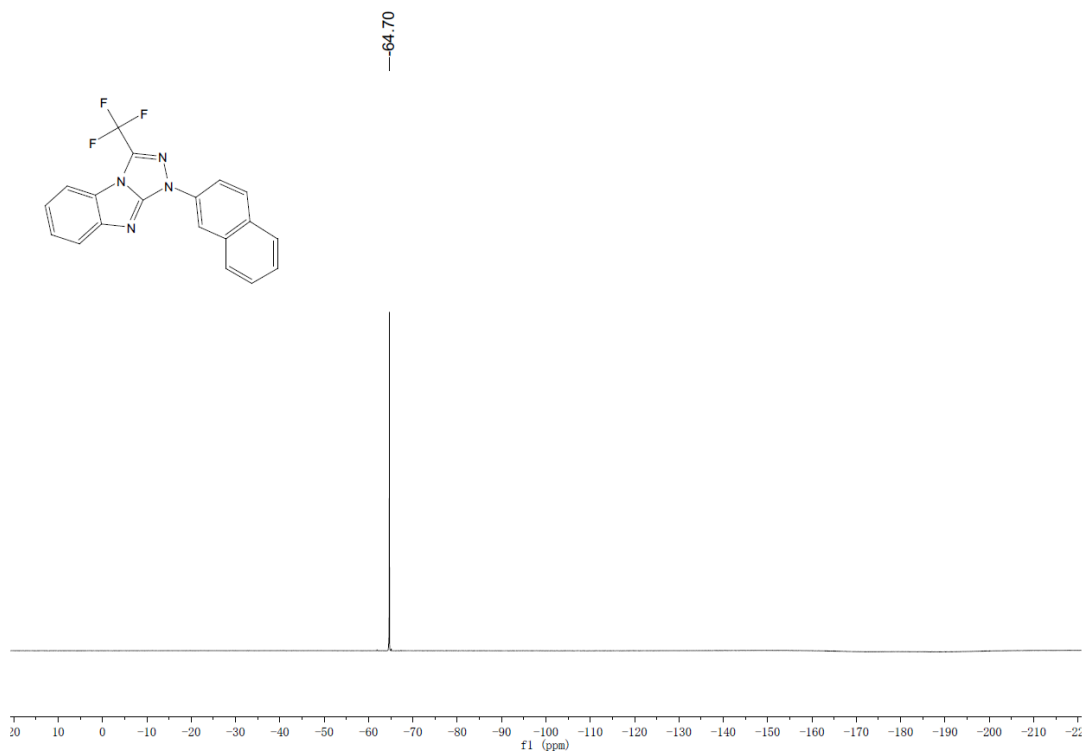

$^{19}\text{F}$  NMR (471 MHz,  $\text{CDCl}_3$ ) of **3t**.

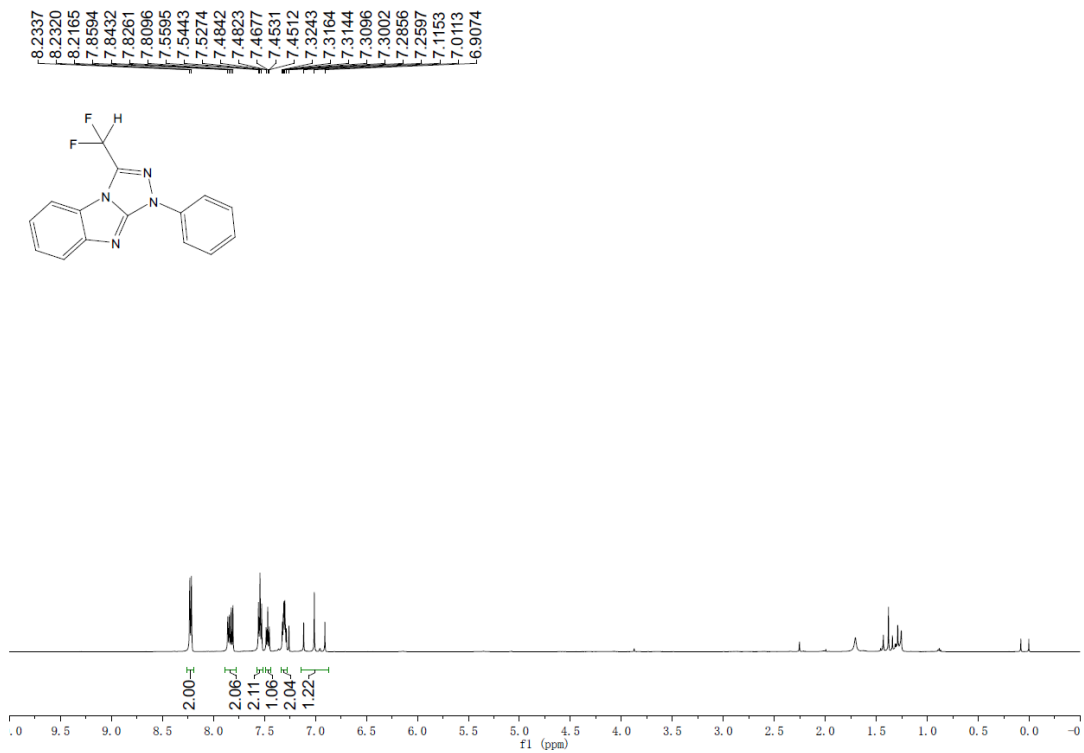

$^1\text{H}$  NMR (500 MHz,  $\text{CDCl}_3$ ) of **3u**.

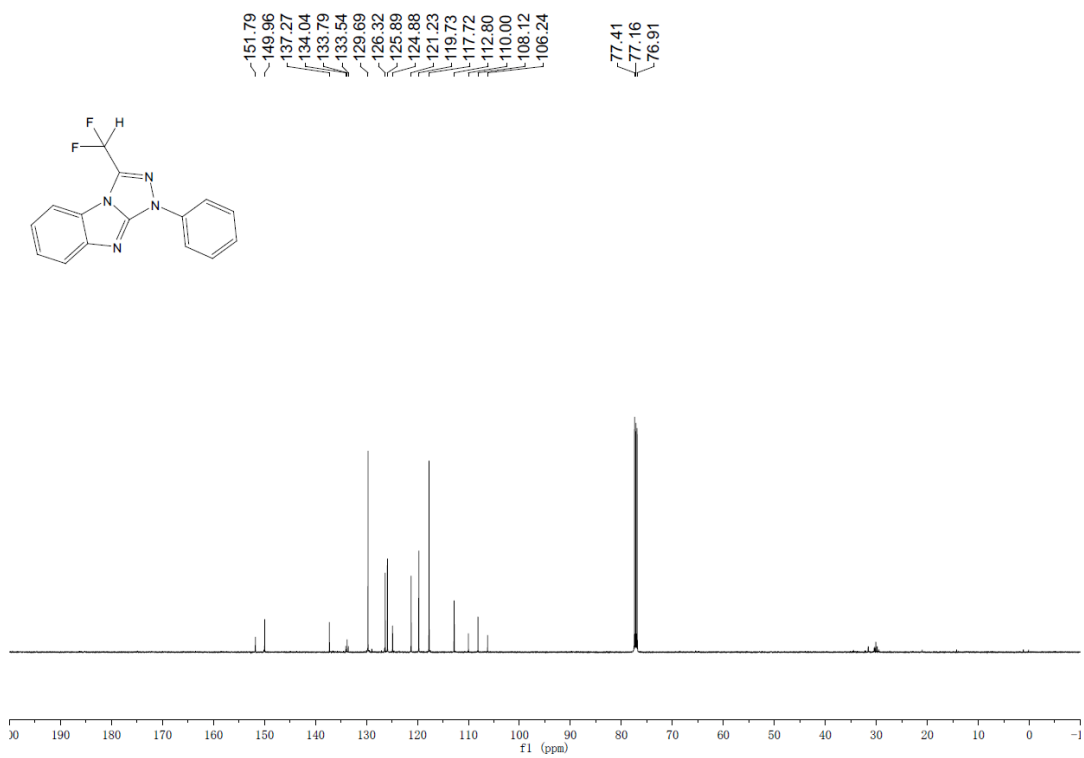

$^{13}\text{C}$  NMR (125 MHz,  $\text{CDCl}_3$ ) of **3u**.



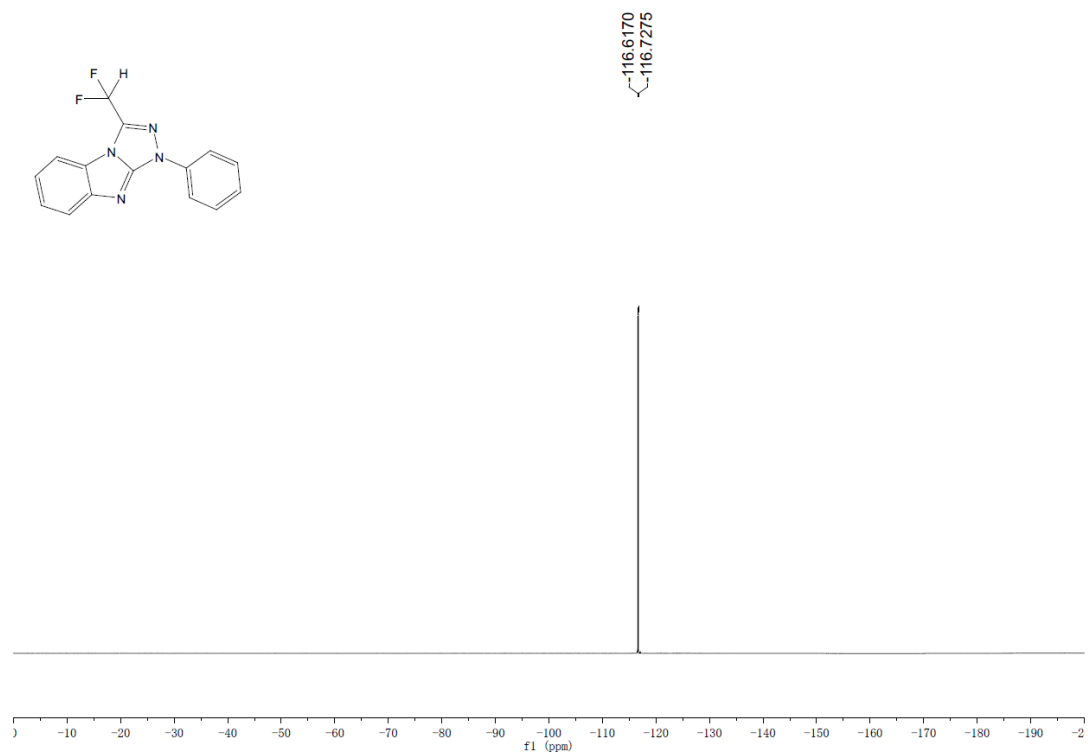

$^{19}\text{F}$  NMR (471 MHz,  $\text{CDCl}_3$ ) of **3u**.

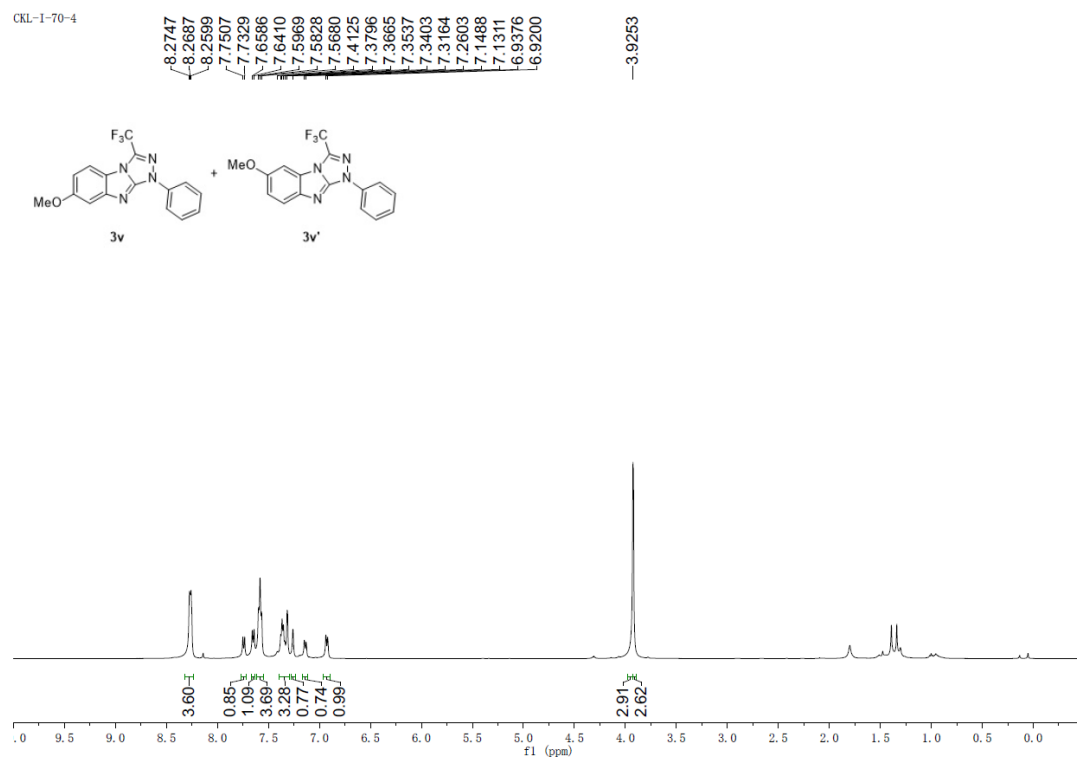

$^1\text{H}$  NMR (500 MHz,  $\text{CDCl}_3$ ) of **3v** and **3v'**.

CKL-1-70-4

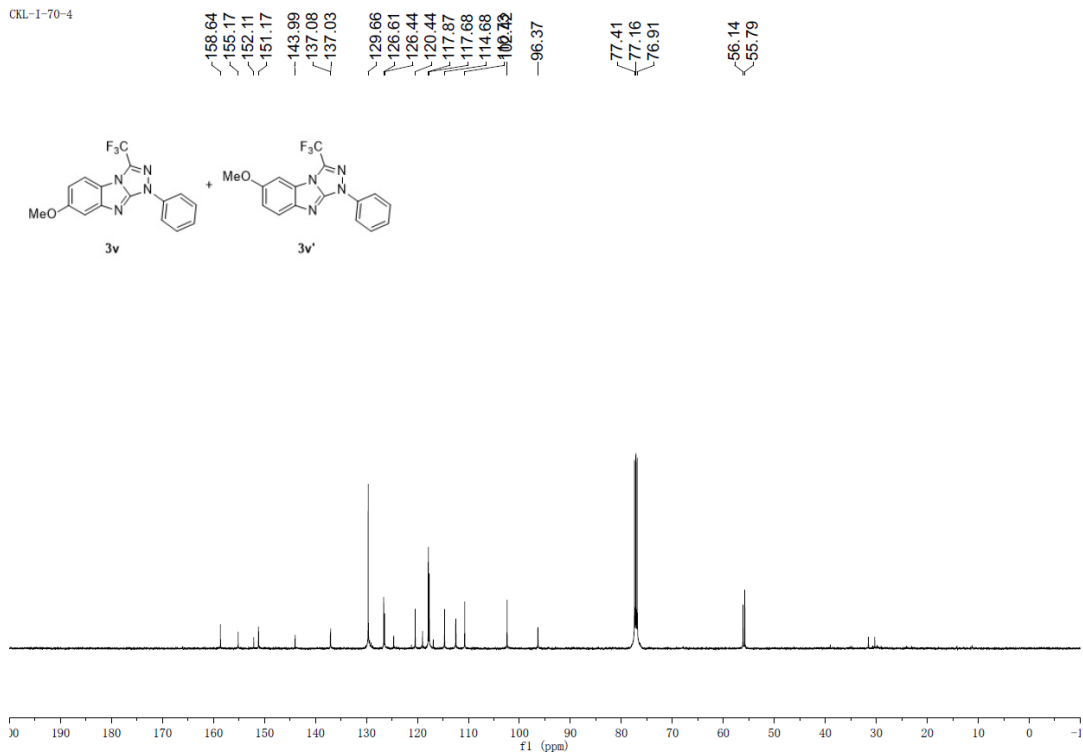

<sup>13</sup>C NMR (125 MHz, CDCl<sub>3</sub>) of **3v** and **3v'**.

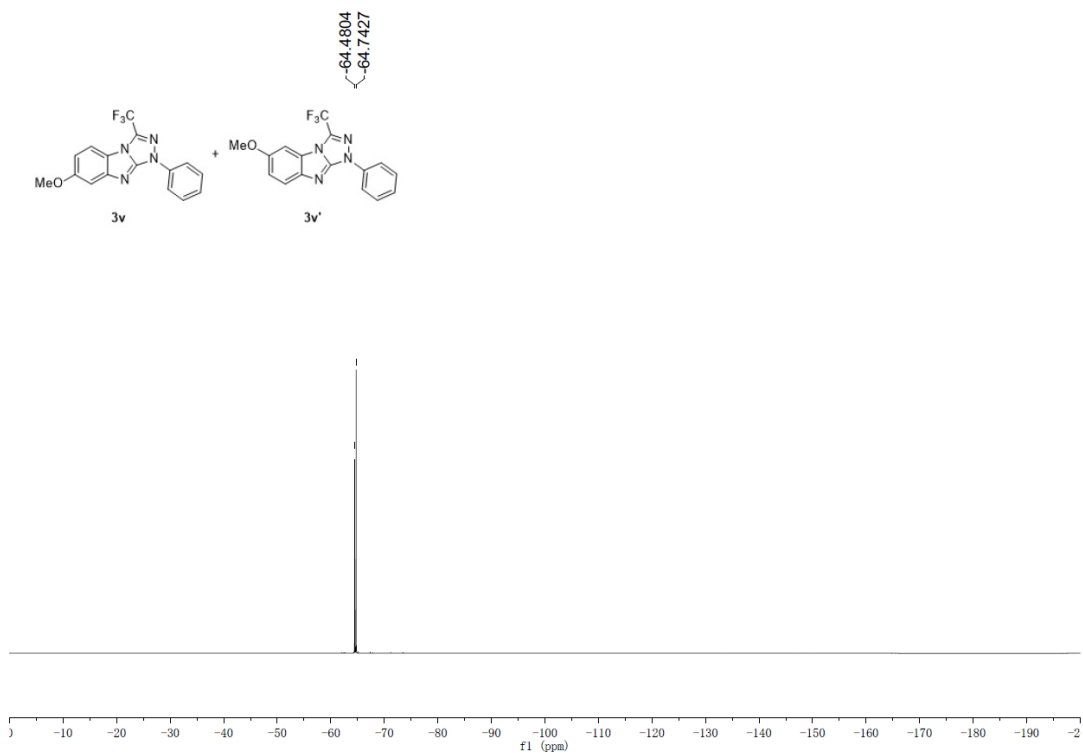

<sup>19</sup>F NMR (471 MHz, CDCl<sub>3</sub>) of **3v** and **3v'**.

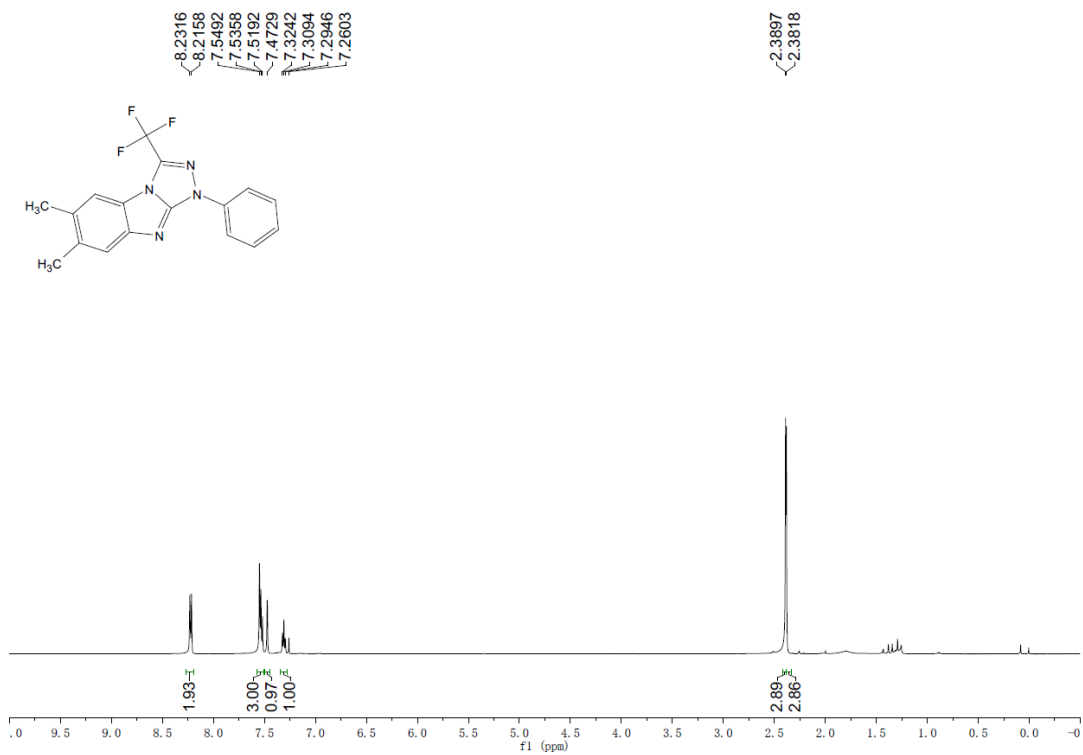

$^1\text{H}$  NMR (500 MHz,  $\text{CDCl}_3$ ) of **3w**.

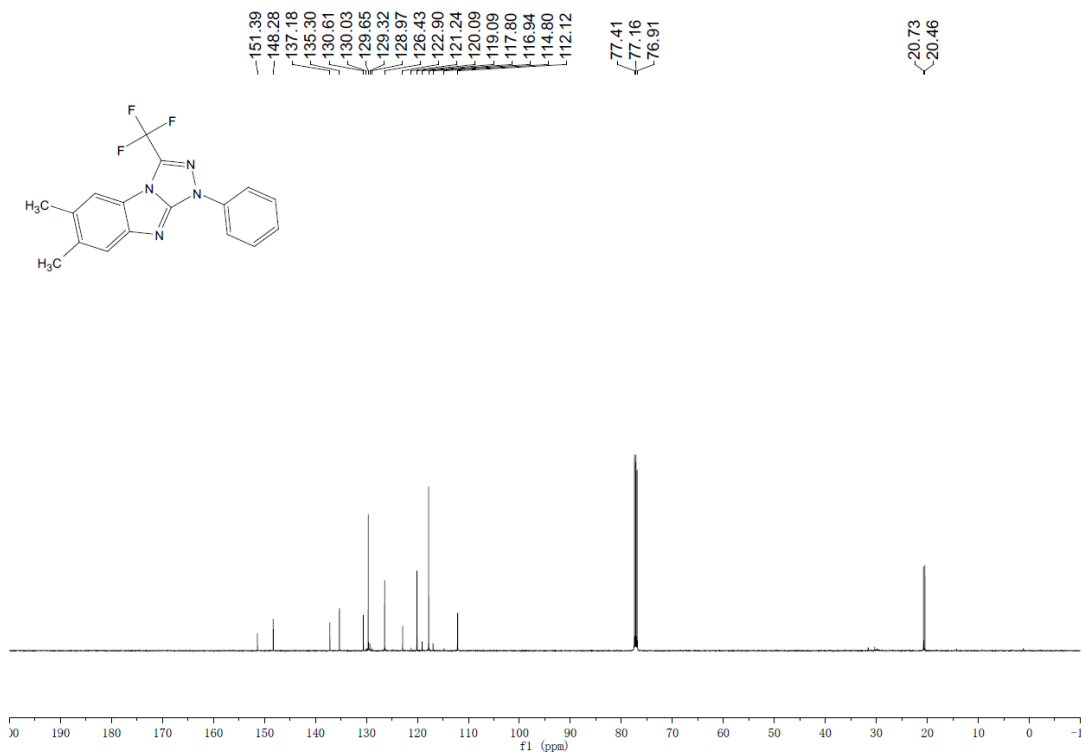

$^{13}\text{C}$  NMR (125 MHz,  $\text{CDCl}_3$ ) of **3w**.

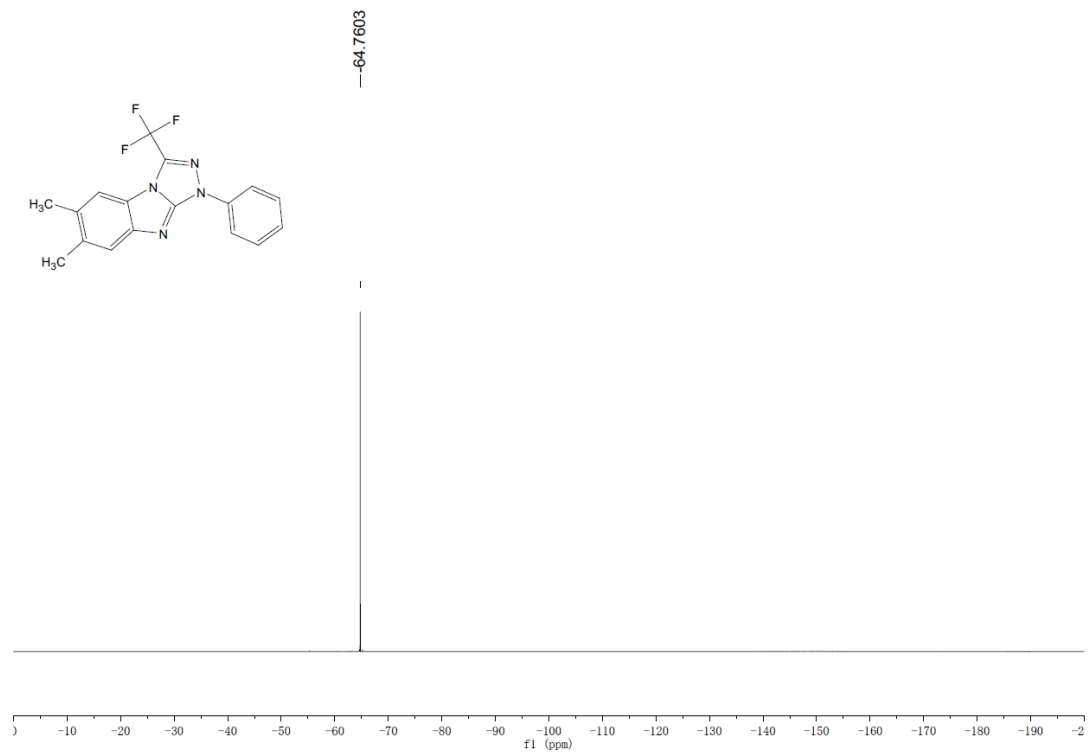

$^{19}\text{F}$  NMR (471 MHz,  $\text{CDCl}_3$ ) of **3w**.

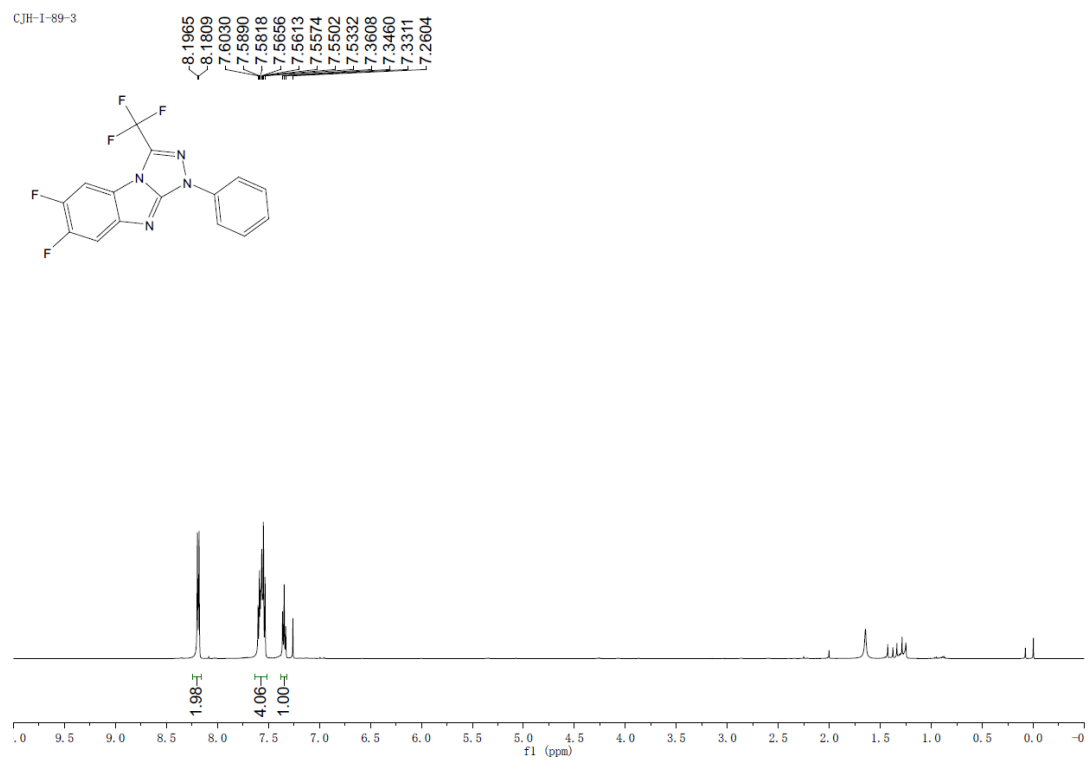

$^1\text{H}$  NMR (500 MHz,  $\text{CDCl}_3$ ) of **3x**.

CJH-1-89-3

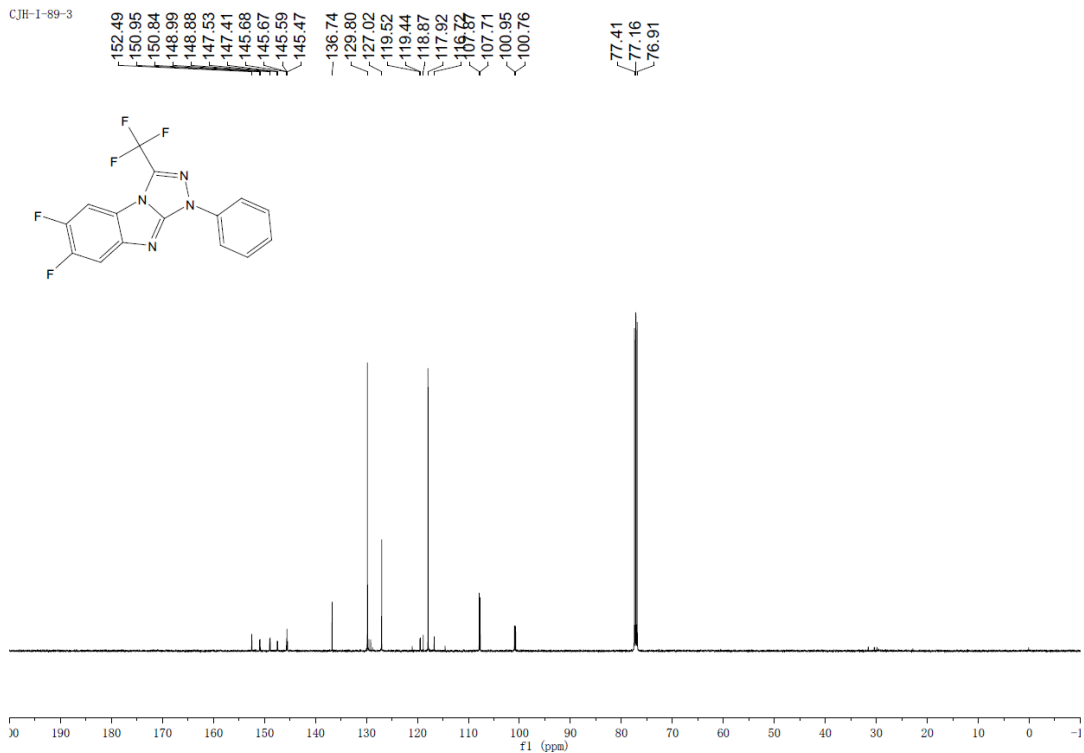

$^{13}\text{C}$  NMR (125 MHz,  $\text{CDCl}_3$ ) of **3x**.

CJH-1-89-3

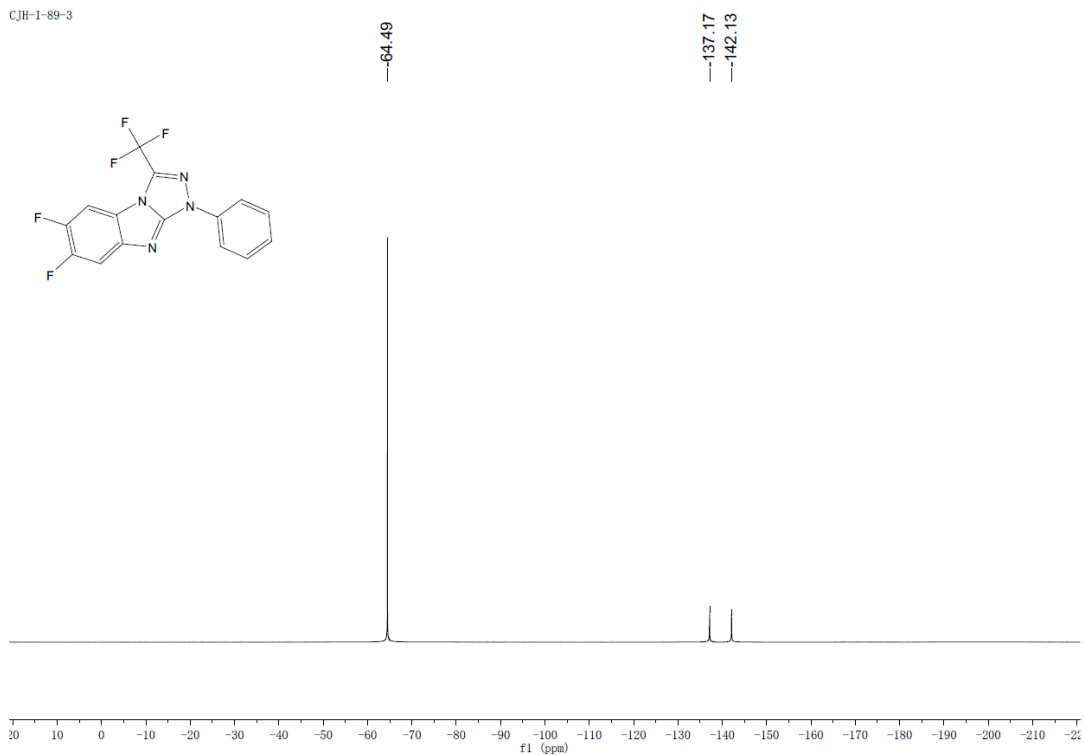

$^{19}\text{F}$  NMR (471 MHz,  $\text{CDCl}_3$ ) of **3x**.

CKL-1-137-2-H

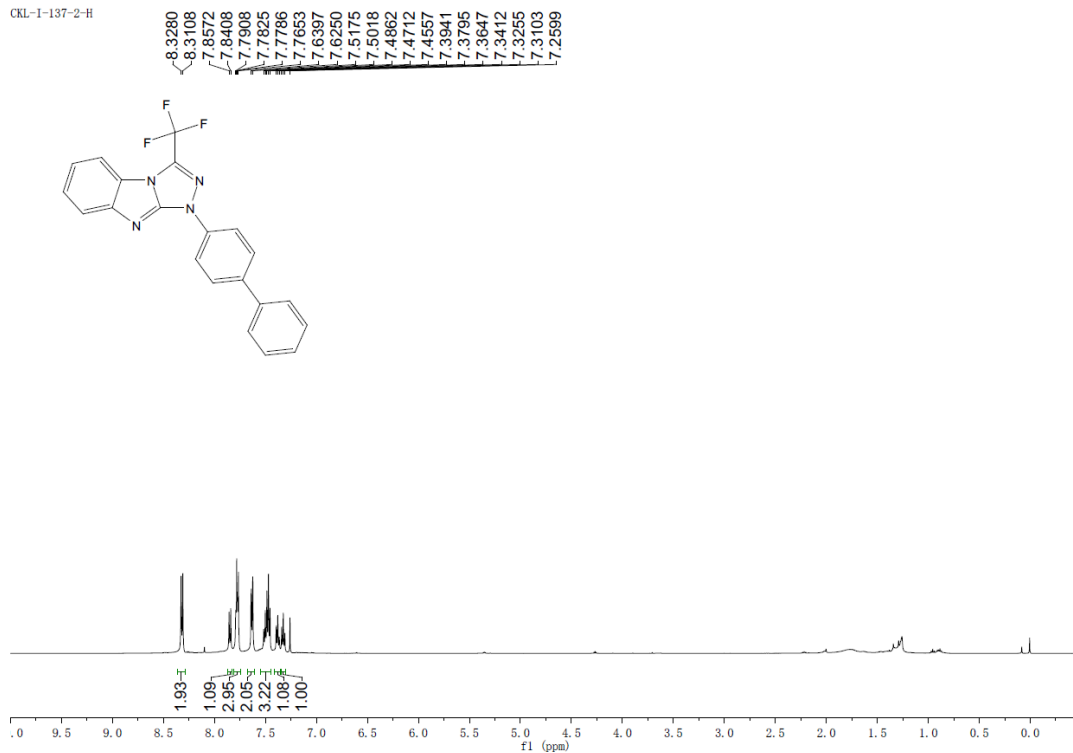

$^1\text{H NMR}$  (500 MHz,  $\text{CDCl}_3$ ) of 4.

CKL-1-137-2-H

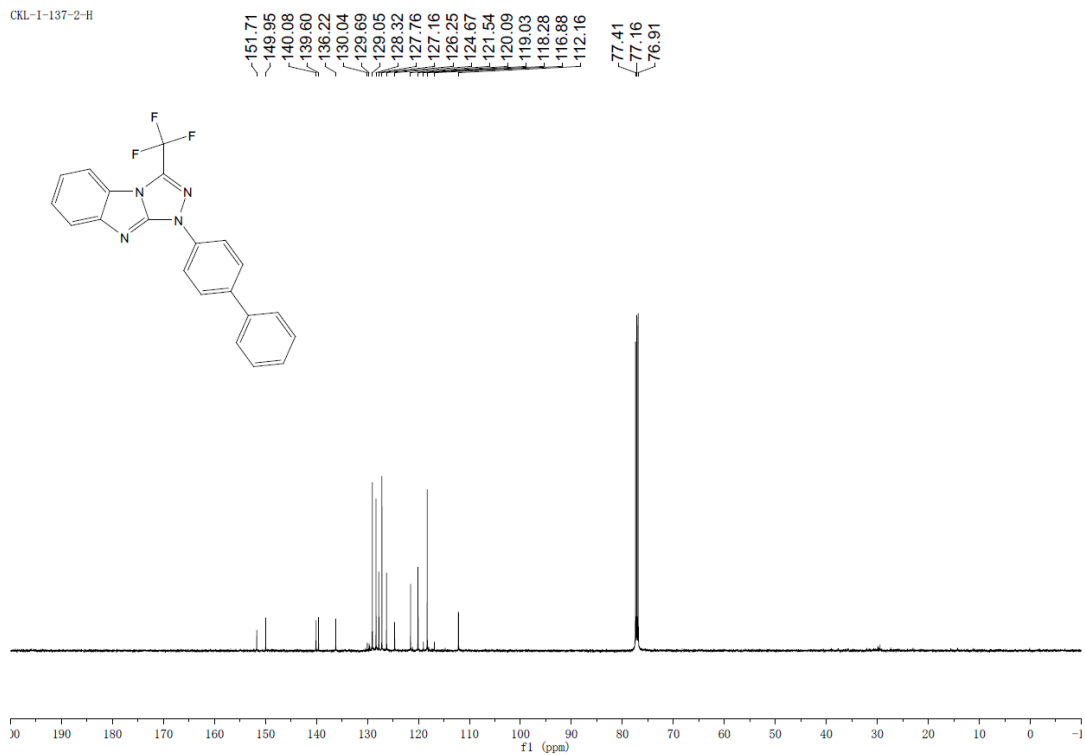

$^{13}\text{C NMR}$  (125 MHz,  $\text{CDCl}_3$ ) of 4.

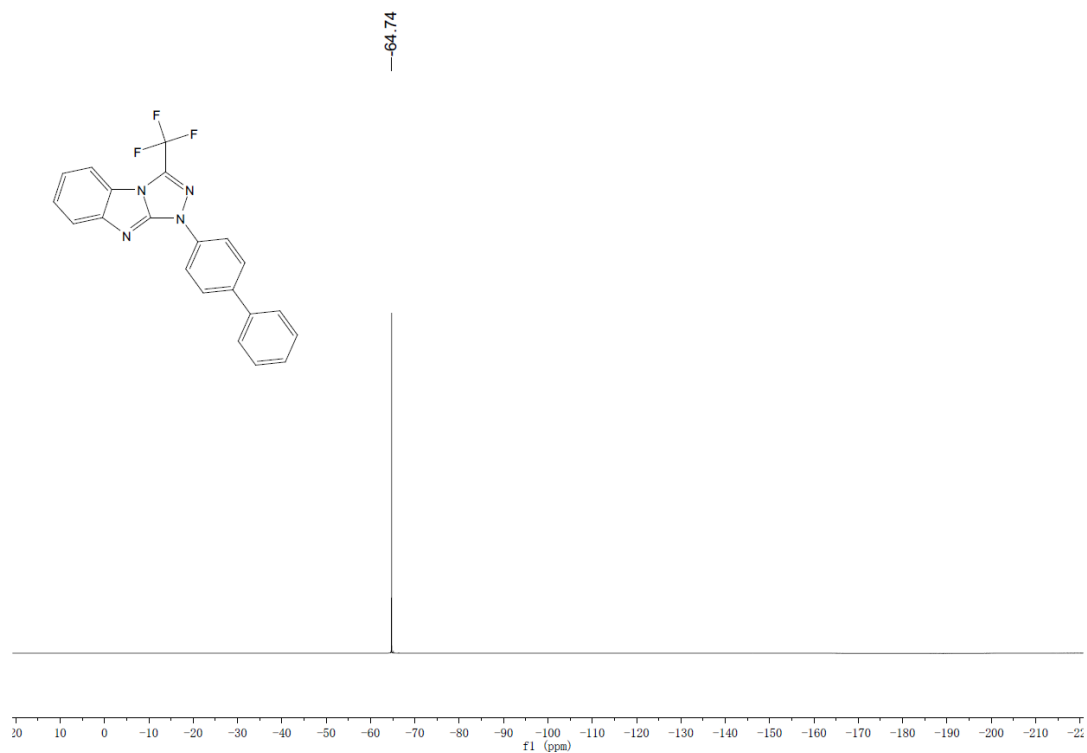

$^{19}\text{F}$  NMR (471 MHz,  $\text{CDCl}_3$ ) of 4.

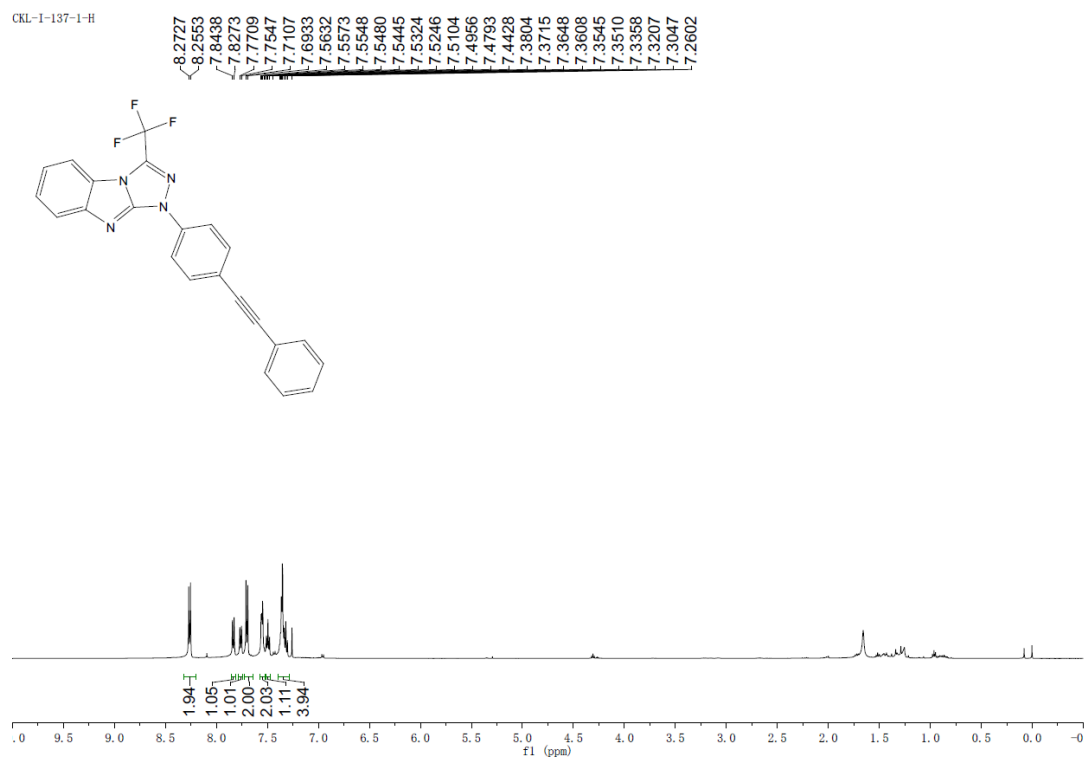

$^1\text{H}$  NMR (500 MHz,  $\text{CDCl}_3$ ) of 5.

CRL-1-137-1-H

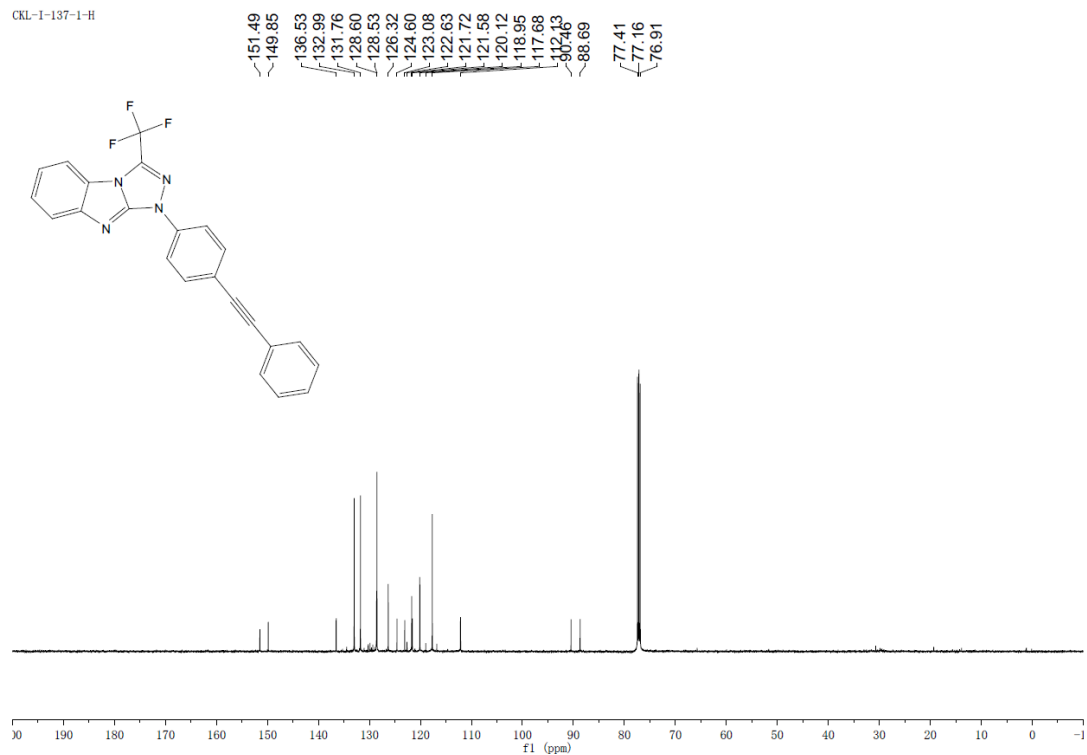

<sup>13</sup>C NMR (125 MHz, CDCl<sub>3</sub>) of 5.

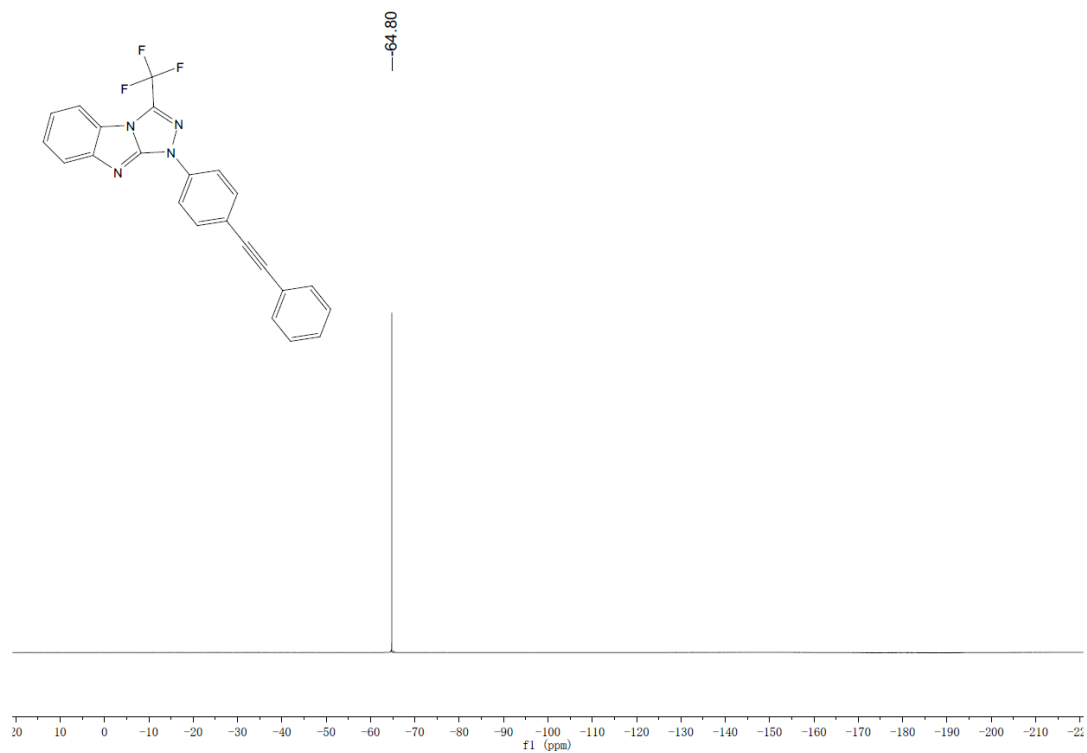

<sup>19</sup>F NMR (471 MHz, CDCl<sub>3</sub>) of 5.



CKL-1-156-1-H-2

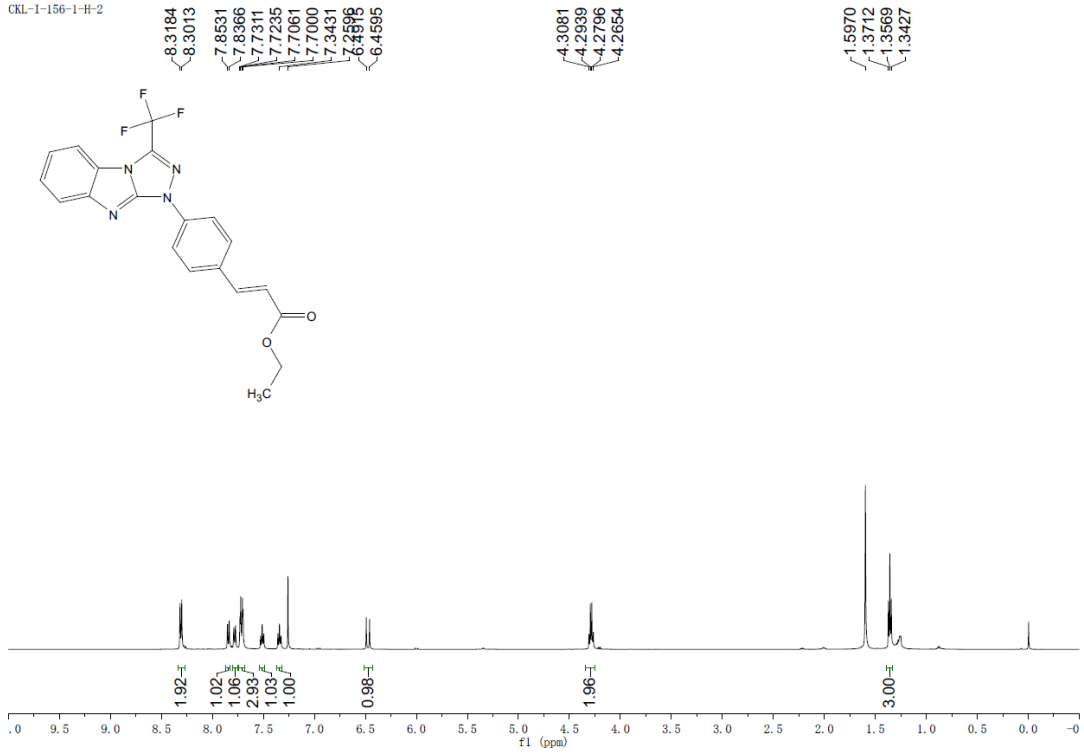

**<sup>1</sup>H NMR (500 MHz, CDCl<sub>3</sub>) of 6.**

CKL-1-156-1-H-2

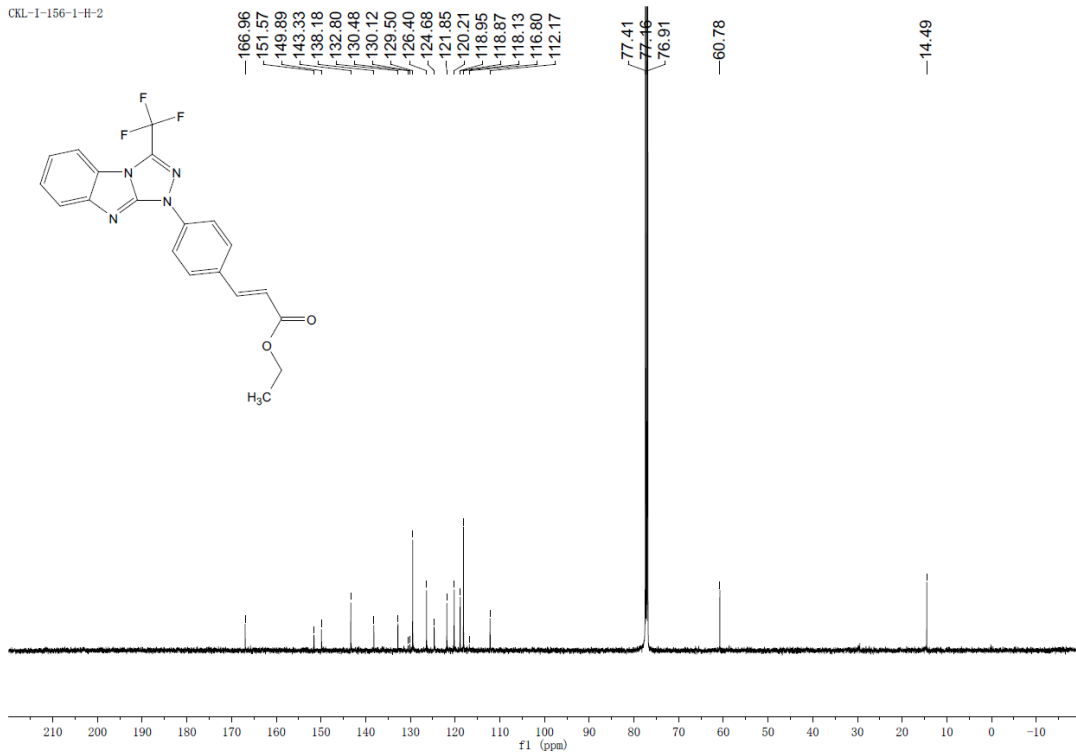

**<sup>13</sup>C NMR (125 MHz, CDCl<sub>3</sub>) of 6.**

CEL-1-156-1

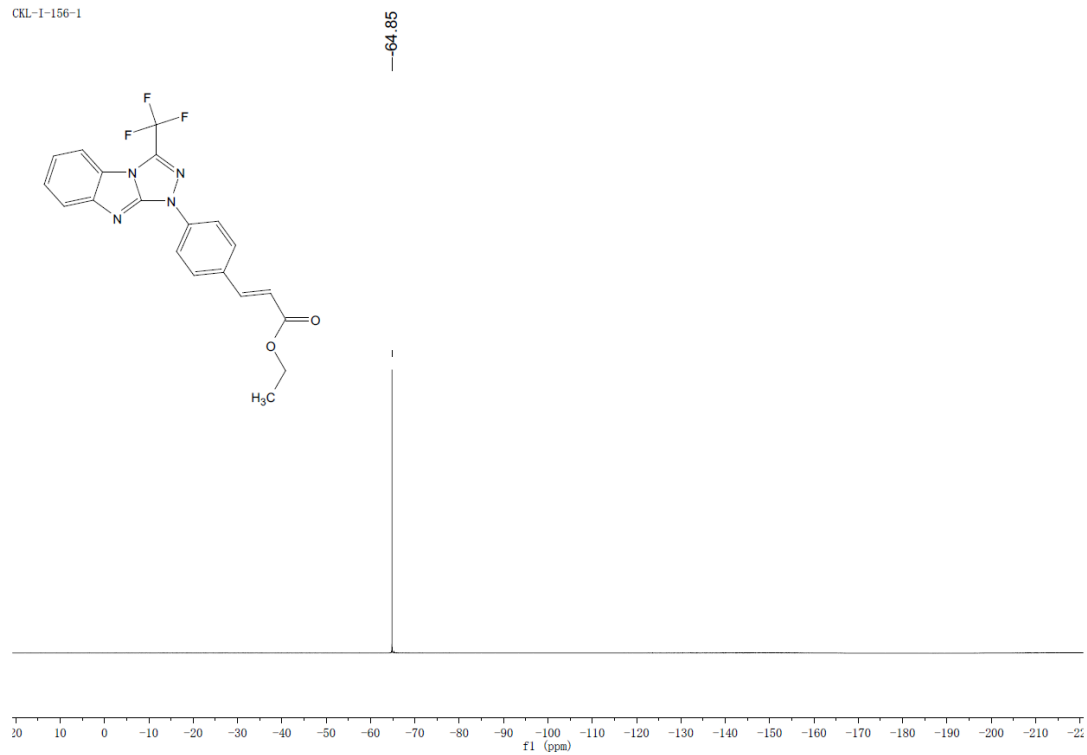

$^{19}\text{F}$  NMR (471 MHz,  $\text{CDCl}_3$ ) of **6**.
